# Supplementary material for: Large-scale analysis of putative plasmids in clinical multidrug-resistant Escherichia coli isolates from Vietnamese patients
Source: Frontiers journal article supplement (doi:10.3389/fmicb.2023.1094119), 2023-05-31
Supplement: Image_1.PDF [file Image_1.PDF]

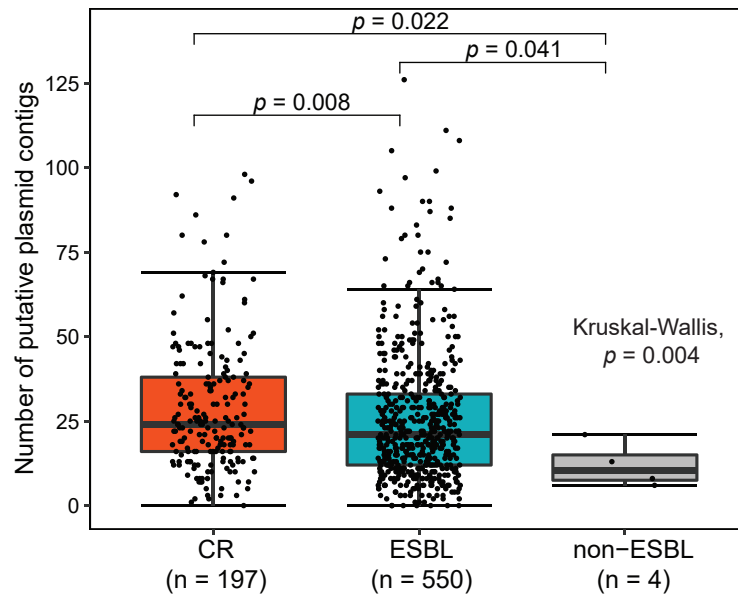

**Supplementary Figure S1.** Boxplot shows the distributions of contigs from the plasmidSPAdes assembler in carbapenem-resistant (CR) isolates, extended-spectrum beta-lactamase (ESBL)-producing isolates, and non-ESBL-producing isolates; n, number of isolates. Distributions were compared with the Kruskal-Wallis test followed by the Dunn's post-hoc test and corrected for multiple testing with the Benjamini-Hochberg method.
