# Supplementary material for: Large-scale analysis of putative plasmids in clinical multidrug-resistant Escherichia coli isolates from Vietnamese patients
Source: Front Microbiol. 2023 May 31;14:1094119. doi: 10.3389/fmicb.2023.1094119 (PMC10265513; doi:10.3389/fmicb.2023.1094119)
Supplement: Supplementary file 3 [file Table_1.XLSX]

## Sheet: TableS1
Supplementary Table S1. List of the E. coli isolates used in this study.
IsolateID	Study	Genomic DNA extraction method	Isolated location	Clinical/Env	Isolate date	Sequencing Platform	MLST	Resistant Phenotype	Total raw reads	Read length (bp)	Sequencing coverage (×)	Number of contigs of length > 500bp from PlasmidSPAdes	Total assembly length of contigs of length > 500bp from PlasmidSPAdes (Kb)
MH13-051M	Hirabayashi et al., 2021	Phenol-chloroform method	A medical institution, Hanoi	clinical	2013	MiniSeq	405	CR	2366156	301	153.949	61	435.208
MH17-008M	Hirabayashi et al., 2021	Phenol-chloroform method	A medical institution, Hanoi	clinical	2017	HiSeq 4000	457	ESBL	4811358	150	234.781	48	236.361
XP817	Our laboratory	Norgen Bacterial Genomic DNA Isolation Kit	Sainpaul hospital, Hanoi	clinical	2012	HiSeq 4000	617	non-ESBL	9570452	150	311.341	24	186.738
TN1393	Our laboratory	Norgen Bacterial Genomic DNA Isolation Kit	Thanh Nhan hospital, Hanoi	clinical	2013	HiSeq 4000	73	CR	11035370	150	358.997	21	71.455
BMP002	Roberts et al., 2022	QIACube and QIAamp 96 DNA QIACube HT kit (Qiagen)	Bach Mai Hospital, Hanoi (BMH)	clinical	2017-06-27	Illumina HiSeq X10 machine	405	CR	4588970	151	150.275	9	136.171
BMP005	Roberts et al., 2022	QIACube and QIAamp 96 DNA QIACube HT kit (Qiagen)	Bach Mai Hospital, Hanoi (BMH)	clinical	2017-06-27	Illumina HiSeq X10 machine	405	CR	3863174	151	126.507	11	137.564
BMP018	Roberts et al., 2022	QIACube and QIAamp 96 DNA QIACube HT kit (Qiagen)	Bach Mai Hospital, Hanoi (BMH)	clinical	2017-06-29	Illumina HiSeq X10 machine	405	CR	4541830	151	148.731	26	793.844
BMP021	Roberts et al., 2022	QIACube and QIAamp 96 DNA QIACube HT kit (Qiagen)	Bach Mai Hospital, Hanoi (BMH)	clinical	2017-06-29	Illumina HiSeq X10 machine	405	ESBL	3862914	151	126.499	17	288.892
BMP023	Roberts et al., 2022	QIACube and QIAamp 96 DNA QIACube HT kit (Qiagen)	Bach Mai Hospital, Hanoi (BMH)	clinical	2017-06-29	Illumina HiSeq X10 machine	4598	CR	4332104	151	141.863	21	215.27
BMP141	Roberts et al., 2022	QIACube and QIAamp 96 DNA QIACube HT kit (Qiagen)	Bach Mai Hospital, Hanoi (BMH)	clinical	2017-07-04	Illumina HiSeq X10 machine	167	ESBL	3870058	151	126.733	13	99.264
BMP143	Roberts et al., 2022	QIACube and QIAamp 96 DNA QIACube HT kit (Qiagen)	Bach Mai Hospital, Hanoi (BMH)	clinical	2017-07-04	Illumina HiSeq X10 machine	405	ESBL	3891532	151	127.436	15	294.996
BMP007	Roberts et al., 2022	QIACube and QIAamp 96 DNA QIACube HT kit (Qiagen)	Bach Mai Hospital, Hanoi (BMH)	clinical	2017-06-27	Illumina HiSeq X10 machine	4981	ESBL	4598894	151	150.6	14	24.539
BMP009	Roberts et al., 2022	QIACube and QIAamp 96 DNA QIACube HT kit (Qiagen)	Bach Mai Hospital, Hanoi (BMH)	clinical	2017-06-27	Illumina HiSeq X10 machine	354	ESBL	4143984	151	135.703	90	1538.48
BMP024	Roberts et al., 2022	QIACube and QIAamp 96 DNA QIACube HT kit (Qiagen)	Bach Mai Hospital, Hanoi (BMH)	clinical	2017-06-29	Illumina HiSeq X10 machine	354	CR	4582980	151	150.079	75	916.005
BMP105	Roberts et al., 2022	QIACube and QIAamp 96 DNA QIACube HT kit (Qiagen)	Bach Mai Hospital, Hanoi (BMH)	clinical	2017-07-01	Illumina HiSeq X10 machine	354	ESBL	3825338	151	125.268	93	1396.47
BMP026	Roberts et al., 2022	QIACube and QIAamp 96 DNA QIACube HT kit (Qiagen)	Bach Mai Hospital, Hanoi (BMH)	clinical	2017-06-29	Illumina HiSeq X10 machine	10	CR	4173330	151	136.664	54	135.086
BMP011	Roberts et al., 2022	QIACube and QIAamp 96 DNA QIACube HT kit (Qiagen)	Bach Mai Hospital, Hanoi (BMH)	clinical	2017-06-28	Illumina HiSeq X10 machine	131	ESBL	4574670	151	149.807	18	999.126
BMP012	Roberts et al., 2022	QIACube and QIAamp 96 DNA QIACube HT kit (Qiagen)	Bach Mai Hospital, Hanoi (BMH)	clinical	2017-06-28	Illumina HiSeq X10 machine	1722	ESBL	4173380	151	136.666	34	780.748
BMP027	Roberts et al., 2022	QIACube and QIAamp 96 DNA QIACube HT kit (Qiagen)	Bach Mai Hospital, Hanoi (BMH)	clinical	2017-06-29	Illumina HiSeq X10 machine	1722	CR	4724062	151	154.699	30	638.204
BMP107	Roberts et al., 2022	QIACube and QIAamp 96 DNA QIACube HT kit (Qiagen)	Bach Mai Hospital, Hanoi (BMH)	clinical	2017-07-01	Illumina HiSeq X10 machine	1722	ESBL	4061100	151	132.989	30	662.579
BMP031	Roberts et al., 2022	QIACube and QIAamp 96 DNA QIACube HT kit (Qiagen)	Bach Mai Hospital, Hanoi (BMH)	clinical	2017-06-29	Illumina HiSeq X10 machine	2064	CR	2325656	151	76.1582	23	72.633
BMP147	Roberts et al., 2022	QIACube and QIAamp 96 DNA QIACube HT kit (Qiagen)	Bach Mai Hospital, Hanoi (BMH)	clinical	2017-07-04	Illumina HiSeq X10 machine	617	ESBL	4958086	151	162.362	39	195.691
BMP148	Roberts et al., 2022	QIACube and QIAamp 96 DNA QIACube HT kit (Qiagen)	Bach Mai Hospital, Hanoi (BMH)	clinical	2017-07-04	Illumina HiSeq X10 machine	617	ESBL	3487428	151	114.203	37	194.368
BMP144	Roberts et al., 2022	QIACube and QIAamp 96 DNA QIACube HT kit (Qiagen)	Bach Mai Hospital, Hanoi (BMH)	clinical	2017-07-04	Illumina HiSeq X10 machine	617	CR	2178044	151	71.3243	18	32.866
BMP145	Roberts et al., 2022	QIACube and QIAamp 96 DNA QIACube HT kit (Qiagen)	Bach Mai Hospital, Hanoi (BMH)	clinical	2017-07-04	Illumina HiSeq X10 machine	617	ESBL	1992788	151	65.2578	16	30.876
BMP035	Roberts et al., 2022	QIACube and QIAamp 96 DNA QIACube HT kit (Qiagen)	Bach Mai Hospital, Hanoi (BMH)	clinical	2017-06-30	Illumina HiSeq X10 machine	617	ESBL	4143878	151	135.699	42	251.39
BMP037	Roberts et al., 2022	QIACube and QIAamp 96 DNA QIACube HT kit (Qiagen)	Bach Mai Hospital, Hanoi (BMH)	clinical	2017-06-30	Illumina HiSeq X10 machine	617	ESBL	2193198	151	71.8206	21	44.952
BMP164	Roberts et al., 2022	QIACube and QIAamp 96 DNA QIACube HT kit (Qiagen)	Bach Mai Hospital, Hanoi (BMH)	clinical	2017-07-06	Illumina HiSeq X10 machine	617	ESBL	3990376	151	130.673	38	206.223
BMP167	Roberts et al., 2022	QIACube and QIAamp 96 DNA QIACube HT kit (Qiagen)	Bach Mai Hospital, Hanoi (BMH)	clinical	2017-07-06	Illumina HiSeq X10 machine	617	ESBL	3764178	151	123.265	39	211.571
BMP437	Roberts et al., 2022	QIACube and QIAamp 96 DNA QIACube HT kit (Qiagen)	Bach Mai Hospital, Hanoi (BMH)	clinical	2017-07-19	Illumina HiSeq X10 machine	773	ESBL	3938754	151	128.982	88	342.824
BMP046	Roberts et al., 2022	QIACube and QIAamp 96 DNA QIACube HT kit (Qiagen)	Bach Mai Hospital, Hanoi (BMH)	clinical	2017-06-30	Illumina HiSeq X10 machine	131	ESBL	4593194	151	150.413	22	851.799
BMP175	Roberts et al., 2022	QIACube and QIAamp 96 DNA QIACube HT kit (Qiagen)	Bach Mai Hospital, Hanoi (BMH)	clinical	2017-07-06	Illumina HiSeq X10 machine	38	ESBL	2778128	151	90.9753	42	150.628
BMP233	Roberts et al., 2022	QIACube and QIAamp 96 DNA QIACube HT kit (Qiagen)	Bach Mai Hospital, Hanoi (BMH)	clinical	2017-07-07	Illumina HiSeq X10 machine	648	ESBL	4572634	151	149.74	29	193.652
BMP049	Roberts et al., 2022	QIACube and QIAamp 96 DNA QIACube HT kit (Qiagen)	Bach Mai Hospital, Hanoi (BMH)	clinical	2017-06-30	Illumina HiSeq X10 machine	617	ESBL	4274772	151	139.986	33	155.471
BMP050	Roberts et al., 2022	QIACube and QIAamp 96 DNA QIACube HT kit (Qiagen)	Bach Mai Hospital, Hanoi (BMH)	clinical	2017-06-30	Illumina HiSeq X10 machine	167	ESBL	4154518	151	136.048	10	34.946
BMP074	Roberts et al., 2022	QIACube and QIAamp 96 DNA QIACube HT kit (Qiagen)	Bach Mai Hospital, Hanoi (BMH)	clinical	2017-06-30	Illumina HiSeq X10 machine	405	ESBL	4205660	151	137.723	20	245.002
BMP113	Roberts et al., 2022	QIACube and QIAamp 96 DNA QIACube HT kit (Qiagen)	Bach Mai Hospital, Hanoi (BMH)	clinical	2017-07-01	Illumina HiSeq X10 machine	405	ESBL	4685656	151	153.441	6	109.357
BMP089	Roberts et al., 2022	QIACube and QIAamp 96 DNA QIACube HT kit (Qiagen)	Bach Mai Hospital, Hanoi (BMH)	clinical	2017-06-30	Illumina HiSeq X10 machine	448	CR	3885986	151	127.254	39	319.895
BMP092	Roberts et al., 2022	QIACube and QIAamp 96 DNA QIACube HT kit (Qiagen)	Bach Mai Hospital, Hanoi (BMH)	clinical	2017-06-30	Illumina HiSeq X10 machine	448	CR	4649614	151	152.261	42	426.889
BMP178	Roberts et al., 2022	QIACube and QIAamp 96 DNA QIACube HT kit (Qiagen)	Bach Mai Hospital, Hanoi (BMH)	clinical	2017-07-06	Illumina HiSeq X10 machine	448	CR	3506992	151	114.843	42	321.534
BMP181	Roberts et al., 2022	QIACube and QIAamp 96 DNA QIACube HT kit (Qiagen)	Bach Mai Hospital, Hanoi (BMH)	clinical	2017-07-06	Illumina HiSeq X10 machine	448	ESBL	4226250	151	138.397	39	320.109
BMP101	Roberts et al., 2022	QIACube and QIAamp 96 DNA QIACube HT kit (Qiagen)	Bach Mai Hospital, Hanoi (BMH)	clinical	2017-06-30	Illumina HiSeq X10 machine	167	CR	2728718	151	89.3572	15	153.333
BMP103	Roberts et al., 2022	QIACube and QIAamp 96 DNA QIACube HT kit (Qiagen)	Bach Mai Hospital, Hanoi (BMH)	clinical	2017-06-30	Illumina HiSeq X10 machine	648	ESBL	3744872	151	122.633	50	1448.35
BMP191	Roberts et al., 2022	QIACube and QIAamp 96 DNA QIACube HT kit (Qiagen)	Bach Mai Hospital, Hanoi (BMH)	clinical	2017-07-06	Illumina HiSeq X10 machine	410	ESBL	3956490	151	129.563	42	719.585
BMP343	Roberts et al., 2022	QIACube and QIAamp 96 DNA QIACube HT kit (Qiagen)	Bach Mai Hospital, Hanoi (BMH)	clinical	2017-07-13	Illumina HiSeq X10 machine	410	ESBL	3666414	151	120.064	48	545.043
BMP346	Roberts et al., 2022	QIACube and QIAamp 96 DNA QIACube HT kit (Qiagen)	Bach Mai Hospital, Hanoi (BMH)	clinical	2017-07-13	Illumina HiSeq X10 machine	410	ESBL	3587218	151	117.47	29	333.408
BMP193	Roberts et al., 2022	QIACube and QIAamp 96 DNA QIACube HT kit (Qiagen)	Bach Mai Hospital, Hanoi (BMH)	clinical	2017-07-06	Illumina HiSeq X10 machine	1674	ESBL	3956618	151	129.567	8	160.84
BMP126	Roberts et al., 2022	QIACube and QIAamp 96 DNA QIACube HT kit (Qiagen)	Bach Mai Hospital, Hanoi (BMH)	clinical	2017-07-01	Illumina HiSeq X10 machine	38	CR	3661066	151	119.889	20	191.006
BMP127	Roberts et al., 2022	QIACube and QIAamp 96 DNA QIACube HT kit (Qiagen)	Bach Mai Hospital, Hanoi (BMH)	clinical	2017-07-01	Illumina HiSeq X10 machine	131	ESBL	3717742	151	121.745	27	178.669
BMP129	Roberts et al., 2022	QIACube and QIAamp 96 DNA QIACube HT kit (Qiagen)	Bach Mai Hospital, Hanoi (BMH)	clinical	2017-07-02	Illumina HiSeq X10 machine	648	CR	3551528	151	116.302	5	18.274
BMP270	Roberts et al., 2022	QIACube and QIAamp 96 DNA QIACube HT kit (Qiagen)	Bach Mai Hospital, Hanoi (BMH)	clinical	2017-07-10	Illumina HiSeq X10 machine	648	ESBL	4120036	151	134.919	50	1255.26
BMP131	Roberts et al., 2022	QIACube and QIAamp 96 DNA QIACube HT kit (Qiagen)	Bach Mai Hospital, Hanoi (BMH)	clinical	2017-07-02	Illumina HiSeq X10 machine	648	CR	3724146	151	121.954	55	306.457
BMP132	Roberts et al., 2022	QIACube and QIAamp 96 DNA QIACube HT kit (Qiagen)	Bach Mai Hospital, Hanoi (BMH)	clinical	2017-07-02	Illumina HiSeq X10 machine	101	ESBL	3749474	151	122.784	11	519.21
BMP138	Roberts et al., 2022	QIACube and QIAamp 96 DNA QIACube HT kit (Qiagen)	Bach Mai Hospital, Hanoi (BMH)	clinical	2017-07-03	Illumina HiSeq X10 machine	648	CR	3459482	151	113.288	25	304.724
BMP206	Roberts et al., 2022	QIACube and QIAamp 96 DNA QIACube HT kit (Qiagen)	Bach Mai Hospital, Hanoi (BMH)	clinical	2017-07-06	Illumina HiSeq X10 machine	167	ESBL	4271312	151	139.872	23	194.064
BMP139	Roberts et al., 2022	QIACube and QIAamp 96 DNA QIACube HT kit (Qiagen)	Bach Mai Hospital, Hanoi (BMH)	clinical	2017-07-03	Illumina HiSeq X10 machine	648	ESBL	3423428	151	112.107	43	1015.47
BMP215	Roberts et al., 2022	QIACube and QIAamp 96 DNA QIACube HT kit (Qiagen)	Bach Mai Hospital, Hanoi (BMH)	clinical	2017-07-06	Illumina HiSeq X10 machine	3711	ESBL	4310306	151	141.149	22	203.573
BMP160	Roberts et al., 2022	QIACube and QIAamp 96 DNA QIACube HT kit (Qiagen)	Bach Mai Hospital, Hanoi (BMH)	clinical	2017-07-05	Illumina HiSeq X10 machine	10	ESBL	4034506	151	132.118	15	209.897
BMP162	Roberts et al., 2022	QIACube and QIAamp 96 DNA QIACube HT kit (Qiagen)	Bach Mai Hospital, Hanoi (BMH)	clinical	2017-07-05	Illumina HiSeq X10 machine	10	CR	4401370	151	144.131	21	176.582
BMP216	Roberts et al., 2022	QIACube and QIAamp 96 DNA QIACube HT kit (Qiagen)	Bach Mai Hospital, Hanoi (BMH)	clinical	2017-07-06	Illumina HiSeq X10 machine	2003	ESBL	4799062	151	157.155	11	27.916
BMP308	Roberts et al., 2022	QIACube and QIAamp 96 DNA QIACube HT kit (Qiagen)	Bach Mai Hospital, Hanoi (BMH)	clinical	2017-07-11	Illumina HiSeq X10 machine	48	ESBL	4087404	151	133.85	38	208.238
BMP350	Roberts et al., 2022	QIACube and QIAamp 96 DNA QIACube HT kit (Qiagen)	Bach Mai Hospital, Hanoi (BMH)	clinical	2017-07-13	Illumina HiSeq X10 machine	410	ESBL	3740496	151	122.49	48	1159.81
BMP353	Roberts et al., 2022	QIACube and QIAamp 96 DNA QIACube HT kit (Qiagen)	Bach Mai Hospital, Hanoi (BMH)	clinical	2017-07-13	Illumina HiSeq X10 machine	410	ESBL	3362432	151	110.109	46	1021.2
BMP390	Roberts et al., 2022	QIACube and QIAamp 96 DNA QIACube HT kit (Qiagen)	Bach Mai Hospital, Hanoi (BMH)	clinical	2017-07-14	Illumina HiSeq X10 machine	648	ESBL	3713716	151	121.613	24	280.687
BMP394	Roberts et al., 2022	QIACube and QIAamp 96 DNA QIACube HT kit (Qiagen)	Bach Mai Hospital, Hanoi (BMH)	clinical	2017-07-14	Illumina HiSeq X10 machine	410	ESBL	2768690	151	90.6662	48	1014.3
BMP243	Roberts et al., 2022	QIACube and QIAamp 96 DNA QIACube HT kit (Qiagen)	Bach Mai Hospital, Hanoi (BMH)	clinical	2017-07-07	Illumina HiSeq X10 machine	167	ESBL	4674258	151	153.068	52	235.035
BMP245	Roberts et al., 2022	QIACube and QIAamp 96 DNA QIACube HT kit (Qiagen)	Bach Mai Hospital, Hanoi (BMH)	clinical	2017-07-07	Illumina HiSeq X10 machine	167	ESBL	4076512	151	133.493	58	319.042
BMP247	Roberts et al., 2022	QIACube and QIAamp 96 DNA QIACube HT kit (Qiagen)	Bach Mai Hospital, Hanoi (BMH)	clinical	2017-07-07	Illumina HiSeq X10 machine	167	ESBL	2847732	151	93.2546	42	165.879
BMP248	Roberts et al., 2022	QIACube and QIAamp 96 DNA QIACube HT kit (Qiagen)	Bach Mai Hospital, Hanoi (BMH)	clinical	2017-07-07	Illumina HiSeq X10 machine	602	ESBL	3491962	151	114.351	9	144.44
BMP327	Roberts et al., 2022	QIACube and QIAamp 96 DNA QIACube HT kit (Qiagen)	Bach Mai Hospital, Hanoi (BMH)	clinical	2017-07-12	Illumina HiSeq X10 machine	46	ESBL	4085540	151	133.789	23	43.903
BMP259	Roberts et al., 2022	QIACube and QIAamp 96 DNA QIACube HT kit (Qiagen)	Bach Mai Hospital, Hanoi (BMH)	clinical	2017-07-08	Illumina HiSeq X10 machine	48	ESBL	4479132	151	146.678	46	493.423
BMP310	Roberts et al., 2022	QIACube and QIAamp 96 DNA QIACube HT kit (Qiagen)	Bach Mai Hospital, Hanoi (BMH)	clinical	2017-07-11	Illumina HiSeq X10 machine	101	ESBL	2460996	151	80.5901	22	213.62
BMP311	Roberts et al., 2022	QIACube and QIAamp 96 DNA QIACube HT kit (Qiagen)	Bach Mai Hospital, Hanoi (BMH)	clinical	2017-07-11	Illumina HiSeq X10 machine	101	ESBL	2200862	151	72.0715	17	209.995
BMP264	Roberts et al., 2022	QIACube and QIAamp 96 DNA QIACube HT kit (Qiagen)	Bach Mai Hospital, Hanoi (BMH)	clinical	2017-07-09	Illumina HiSeq X10 machine	1193	ESBL	3817978	151	125.027	11	17.878
BMP279	Roberts et al., 2022	QIACube and QIAamp 96 DNA QIACube HT kit (Qiagen)	Bach Mai Hospital, Hanoi (BMH)	clinical	2017-07-10	Illumina HiSeq X10 machine	2179	ESBL	4974060	151	162.885	0	0
BMP285	Roberts et al., 2022	QIACube and QIAamp 96 DNA QIACube HT kit (Qiagen)	Bach Mai Hospital, Hanoi (BMH)	clinical	2017-07-10	Illumina HiSeq X10 machine	457	CR	3297576	151	107.986	10	147.268
BMP358	Roberts et al., 2022	QIACube and QIAamp 96 DNA QIACube HT kit (Qiagen)	Bach Mai Hospital, Hanoi (BMH)	clinical	2017-07-13	Illumina HiSeq X10 machine	405	ESBL	4143956	151	135.702	25	593.095
BMP360	Roberts et al., 2022	QIACube and QIAamp 96 DNA QIACube HT kit (Qiagen)	Bach Mai Hospital, Hanoi (BMH)	clinical	2017-07-13	Illumina HiSeq X10 machine	405	CR	3717754	151	121.745	20	543.07
BMP447	Roberts et al., 2022	QIACube and QIAamp 96 DNA QIACube HT kit (Qiagen)	Bach Mai Hospital, Hanoi (BMH)	clinical	2017-07-20	Illumina HiSeq X10 machine	405	ESBL	4300090	151	140.815	21	315.287
BMP451	Roberts et al., 2022	QIACube and QIAamp 96 DNA QIACube HT kit (Qiagen)	Bach Mai Hospital, Hanoi (BMH)	clinical	2017-07-20	Illumina HiSeq X10 machine	405	CR	3978184	151	130.273	25	238.822
BMP595	Roberts et al., 2022	QIACube and QIAamp 96 DNA QIACube HT kit (Qiagen)	Bach Mai Hospital, Hanoi (BMH)	clinical	2017-07-27	Illumina HiSeq X10 machine	405	ESBL	3754350	151	122.944	20	128.278
BMP600	Roberts et al., 2022	QIACube and QIAamp 96 DNA QIACube HT kit (Qiagen)	Bach Mai Hospital, Hanoi (BMH)	clinical	2017-07-27	Illumina HiSeq X10 machine	405	ESBL	3836006	151	125.618	17	211.759
BMP541	Roberts et al., 2022	QIACube and QIAamp 96 DNA QIACube HT kit (Qiagen)	Bach Mai Hospital, Hanoi (BMH)	clinical	2017-07-28	Illumina HiSeq X10 machine	405	ESBL	4177328	151	136.795	20	128.218
BMP659	Roberts et al., 2022	QIACube and QIAamp 96 DNA QIACube HT kit (Qiagen)	Bach Mai Hospital, Hanoi (BMH)	clinical	2017-07-28	Illumina HiSeq X10 machine	405	ESBL	3812346	151	124.843	29	810.857
BMP662	Roberts et al., 2022	QIACube and QIAamp 96 DNA QIACube HT kit (Qiagen)	Bach Mai Hospital, Hanoi (BMH)	clinical	2017-07-28	Illumina HiSeq X10 machine	405	ESBL	3826486	151	125.306	18	531.785
BMP296	Roberts et al., 2022	QIACube and QIAamp 96 DNA QIACube HT kit (Qiagen)	Bach Mai Hospital, Hanoi (BMH)	clinical	2017-07-10	Illumina HiSeq X10 machine	224	CR	4244722	151	139.002	12	183.29
BMP317	Roberts et al., 2022	QIACube and QIAamp 96 DNA QIACube HT kit (Qiagen)	Bach Mai Hospital, Hanoi (BMH)	clinical	2017-07-11	Illumina HiSeq X10 machine	405	ESBL	3768188	151	123.397	7	156.604
BMP370	Roberts et al., 2022	QIACube and QIAamp 96 DNA QIACube HT kit (Qiagen)	Bach Mai Hospital, Hanoi (BMH)	clinical	2017-07-13	Illumina HiSeq X10 machine	405	ESBL	3756784	151	123.023	6	145.493
BMP369	Roberts et al., 2022	QIACube and QIAamp 96 DNA QIACube HT kit (Qiagen)	Bach Mai Hospital, Hanoi (BMH)	clinical	2017-07-13	Illumina HiSeq X10 machine	405	ESBL	2564228	151	83.9707	13	290.245
BMP372	Roberts et al., 2022	QIACube and QIAamp 96 DNA QIACube HT kit (Qiagen)	Bach Mai Hospital, Hanoi (BMH)	clinical	2017-07-13	Illumina HiSeq X10 machine	648	ESBL	3621668	151	118.599	25	207.726
BMP318	Roberts et al., 2022	QIACube and QIAamp 96 DNA QIACube HT kit (Qiagen)	Bach Mai Hospital, Hanoi (BMH)	clinical	2017-07-11	Illumina HiSeq X10 machine	410	CR	3564632	151	116.731	19	190.657
BMP319	Roberts et al., 2022	QIACube and QIAamp 96 DNA QIACube HT kit (Qiagen)	Bach Mai Hospital, Hanoi (BMH)	clinical	2017-07-11	Illumina HiSeq X10 machine	410	ESBL	3670804	151	120.208	18	141.57
BMP320	Roberts et al., 2022	QIACube and QIAamp 96 DNA QIACube HT kit (Qiagen)	Bach Mai Hospital, Hanoi (BMH)	clinical	2017-07-11	Illumina HiSeq X10 machine	410	CR	3852474	151	126.157	14	118.912
BMP373	Roberts et al., 2022	QIACube and QIAamp 96 DNA QIACube HT kit (Qiagen)	Bach Mai Hospital, Hanoi (BMH)	clinical	2017-07-13	Illumina HiSeq X10 machine	410	ESBL	2871498	151	94.0328	22	375.457
BMP375	Roberts et al., 2022	QIACube and QIAamp 96 DNA QIACube HT kit (Qiagen)	Bach Mai Hospital, Hanoi (BMH)	clinical	2017-07-13	Illumina HiSeq X10 machine	410	CR	2403474	151	78.7065	21	495.112
BMP419	Roberts et al., 2022	QIACube and QIAamp 96 DNA QIACube HT kit (Qiagen)	Bach Mai Hospital, Hanoi (BMH)	clinical	2017-07-17	Illumina HiSeq X10 machine	648	ESBL	3698540	151	121.116	36	276.502
BMP422	Roberts et al., 2022	QIACube and QIAamp 96 DNA QIACube HT kit (Qiagen)	Bach Mai Hospital, Hanoi (BMH)	clinical	2017-07-17	Illumina HiSeq X10 machine	648	ESBL	3527250	151	115.507	41	335.539
BMP324	Roberts et al., 2022	QIACube and QIAamp 96 DNA QIACube HT kit (Qiagen)	Bach Mai Hospital, Hanoi (BMH)	clinical	2017-07-11	Illumina HiSeq X10 machine	648	CR	4221146	151	138.23	35	706.577
BMP379	Roberts et al., 2022	QIACube and QIAamp 96 DNA QIACube HT kit (Qiagen)	Bach Mai Hospital, Hanoi (BMH)	clinical	2017-07-13	Illumina HiSeq X10 machine	648	ESBL	3550340	151	116.263	25	484.629
BMP380	Roberts et al., 2022	QIACube and QIAamp 96 DNA QIACube HT kit (Qiagen)	Bach Mai Hospital, Hanoi (BMH)	clinical	2017-07-13	Illumina HiSeq X10 machine	648	ESBL	3447806	151	112.905	12	166.078
BMP331	Roberts et al., 2022	QIACube and QIAamp 96 DNA QIACube HT kit (Qiagen)	Bach Mai Hospital, Hanoi (BMH)	clinical	2017-07-12	Illumina HiSeq X10 machine	410	ESBL	3909184	151	128.014	27	157.874
BMP334	Roberts et al., 2022	QIACube and QIAamp 96 DNA QIACube HT kit (Qiagen)	Bach Mai Hospital, Hanoi (BMH)	clinical	2017-07-12	Illumina HiSeq X10 machine	410	ESBL	3794136	151	124.246	32	234.842
BMP335	Roberts et al., 2022	QIACube and QIAamp 96 DNA QIACube HT kit (Qiagen)	Bach Mai Hospital, Hanoi (BMH)	clinical	2017-07-12	Illumina HiSeq X10 machine	1193	ESBL	3666348	151	120.062	25	715.068
BMP336	Roberts et al., 2022	QIACube and QIAamp 96 DNA QIACube HT kit (Qiagen)	Bach Mai Hospital, Hanoi (BMH)	clinical	2017-07-12	Illumina HiSeq X10 machine	1193	ESBL	2458618	151	80.5123	11	26.252
BMP456	Roberts et al., 2022	QIACube and QIAamp 96 DNA QIACube HT kit (Qiagen)	Bach Mai Hospital, Hanoi (BMH)	clinical	2017-07-20	Illumina HiSeq X10 machine	1193	ESBL	4267176	151	139.737	32	524.738
BMP497	Roberts et al., 2022	QIACube and QIAamp 96 DNA QIACube HT kit (Qiagen)	Bach Mai Hospital, Hanoi (BMH)	clinical	2017-07-22	Illumina HiSeq X10 machine	1193	CR	3654888	151	119.686	20	631.966
BMP384	Roberts et al., 2022	QIACube and QIAamp 96 DNA QIACube HT kit (Qiagen)	Bach Mai Hospital, Hanoi (BMH)	clinical	2017-07-13	Illumina HiSeq X10 machine	648	ESBL	3955538	151	129.532	18	949.064
BMP386	Roberts et al., 2022	QIACube and QIAamp 96 DNA QIACube HT kit (Qiagen)	Bach Mai Hospital, Hanoi (BMH)	clinical	2017-07-13	Illumina HiSeq X10 machine	517	CR	3811602	151	124.818	53	120.807
BMP457	Roberts et al., 2022	QIACube and QIAamp 96 DNA QIACube HT kit (Qiagen)	Bach Mai Hospital, Hanoi (BMH)	clinical	2017-07-20	Illumina HiSeq X10 machine	617	ESBL	4080258	151	133.616	38	204.731
BMP459	Roberts et al., 2022	QIACube and QIAamp 96 DNA QIACube HT kit (Qiagen)	Bach Mai Hospital, Hanoi (BMH)	clinical	2017-07-20	Illumina HiSeq X10 machine	617	CR	3762714	151	123.217	37	194.678
BMP397	Roberts et al., 2022	QIACube and QIAamp 96 DNA QIACube HT kit (Qiagen)	Bach Mai Hospital, Hanoi (BMH)	clinical	2017-07-14	Illumina HiSeq X10 machine	38	ESBL	4145210	151	135.743	8	60.538
BMP462	Roberts et al., 2022	QIACube and QIAamp 96 DNA QIACube HT kit (Qiagen)	Bach Mai Hospital, Hanoi (BMH)	clinical	2017-07-20	Illumina HiSeq X10 machine	410	ESBL	4204376	151	137.681	13	84.493
BMP464	Roberts et al., 2022	QIACube and QIAamp 96 DNA QIACube HT kit (Qiagen)	Bach Mai Hospital, Hanoi (BMH)	clinical	2017-07-20	Illumina HiSeq X10 machine	405	ESBL	3595738	151	117.749	48	325.005
BMP505	Roberts et al., 2022	QIACube and QIAamp 96 DNA QIACube HT kit (Qiagen)	Bach Mai Hospital, Hanoi (BMH)	clinical	2017-07-22	Illumina HiSeq X10 machine	69	ESBL	3615034	151	118.381	18	363.18
BMP403	Roberts et al., 2022	QIACube and QIAamp 96 DNA QIACube HT kit (Qiagen)	Bach Mai Hospital, Hanoi (BMH)	clinical	2017-07-15	Illumina HiSeq X10 machine	226	CR	2655868	151	86.9716	7	19.322
BMP408	Roberts et al., 2022	QIACube and QIAamp 96 DNA QIACube HT kit (Qiagen)	Bach Mai Hospital, Hanoi (BMH)	clinical	2017-07-16	Illumina HiSeq X10 machine	38	ESBL	3721278	151	121.861	12	252.061
BMP428	Roberts et al., 2022	QIACube and QIAamp 96 DNA QIACube HT kit (Qiagen)	Bach Mai Hospital, Hanoi (BMH)	clinical	2017-07-18	Illumina HiSeq X10 machine	648	ESBL	3930774	151	128.721	87	367.351
BMP478	Roberts et al., 2022	QIACube and QIAamp 96 DNA QIACube HT kit (Qiagen)	Bach Mai Hospital, Hanoi (BMH)	clinical	2017-07-20	Illumina HiSeq X10 machine	31	ESBL	3476282	151	113.838	4	58.555
BMP484	Roberts et al., 2022	QIACube and QIAamp 96 DNA QIACube HT kit (Qiagen)	Bach Mai Hospital, Hanoi (BMH)	clinical	2017-07-20	Illumina HiSeq X10 machine	414	ESBL	2633620	151	86.2431	14	114.341
BMP487	Roberts et al., 2022	QIACube and QIAamp 96 DNA QIACube HT kit (Qiagen)	Bach Mai Hospital, Hanoi (BMH)	clinical	2017-07-21	Illumina HiSeq X10 machine	457	ESBL	4172090	151	136.623	16	178.512
BMP490	Roberts et al., 2022	QIACube and QIAamp 96 DNA QIACube HT kit (Qiagen)	Bach Mai Hospital, Hanoi (BMH)	clinical	2017-07-21	Illumina HiSeq X10 machine	457	ESBL	3886368	151	127.267	19	563.218
BMP513	Roberts et al., 2022	QIACube and QIAamp 96 DNA QIACube HT kit (Qiagen)	Bach Mai Hospital, Hanoi (BMH)	clinical	2017-07-24	Illumina HiSeq X10 machine	457	ESBL	4433404	151	145.181	12	194.913
BMP515	Roberts et al., 2022	QIACube and QIAamp 96 DNA QIACube HT kit (Qiagen)	Bach Mai Hospital, Hanoi (BMH)	clinical	2017-07-24	Illumina HiSeq X10 machine	457	CR	3799986	151	124.438	10	64.708
BMP520	Roberts et al., 2022	QIACube and QIAamp 96 DNA QIACube HT kit (Qiagen)	Bach Mai Hospital, Hanoi (BMH)	clinical	2017-07-24	Illumina HiSeq X10 machine	648	ESBL	3649124	151	119.498	19	201.366
BMP506	Roberts et al., 2022	QIACube and QIAamp 96 DNA QIACube HT kit (Qiagen)	Bach Mai Hospital, Hanoi (BMH)	clinical	2017-07-24	Illumina HiSeq X10 machine	69	ESBL	3832864	151	125.515	19	352.321
BMP568	Roberts et al., 2022	QIACube and QIAamp 96 DNA QIACube HT kit (Qiagen)	Bach Mai Hospital, Hanoi (BMH)	clinical	2017-07-26	Illumina HiSeq X10 machine	69	CR	4080828	151	133.635	33	915.835
BMP567	Roberts et al., 2022	QIACube and QIAamp 96 DNA QIACube HT kit (Qiagen)	Bach Mai Hospital, Hanoi (BMH)	clinical	2017-07-26	Illumina HiSeq X10 machine	410	ESBL	4392486	151	143.841	21	508.633
BMP525	Roberts et al., 2022	QIACube and QIAamp 96 DNA QIACube HT kit (Qiagen)	Bach Mai Hospital, Hanoi (BMH)	clinical	2017-07-24	Illumina HiSeq X10 machine	648	ESBL	3918306	151	128.313	26	305.713
BMP529	Roberts et al., 2022	QIACube and QIAamp 96 DNA QIACube HT kit (Qiagen)	Bach Mai Hospital, Hanoi (BMH)	clinical	2017-07-24	Illumina HiSeq X10 machine	746	ESBL	3620432	151	118.558	16	88.135
BMP546	Roberts et al., 2022	QIACube and QIAamp 96 DNA QIACube HT kit (Qiagen)	Bach Mai Hospital, Hanoi (BMH)	clinical	2017-07-25	Illumina HiSeq X10 machine	224	ESBL	4033824	151	132.095	16	147.341
BMP578	Roberts et al., 2022	QIACube and QIAamp 96 DNA QIACube HT kit (Qiagen)	Bach Mai Hospital, Hanoi (BMH)	clinical	2017-07-26	Illumina HiSeq X10 machine	405	ESBL	3804990	151	124.602	7	25.988
BMP532	Roberts et al., 2022	QIACube and QIAamp 96 DNA QIACube HT kit (Qiagen)	Bach Mai Hospital, Hanoi (BMH)	clinical	2017-07-24	Illumina HiSeq X10 machine	540	ESBL	3522596	151	115.354	13	57.28
BMP536	Roberts et al., 2022	QIACube and QIAamp 96 DNA QIACube HT kit (Qiagen)	Bach Mai Hospital, Hanoi (BMH)	clinical	2017-07-24	Illumina HiSeq X10 machine	540	ESBL	3442548	151	112.733	12	50.321
BMP537	Roberts et al., 2022	QIACube and QIAamp 96 DNA QIACube HT kit (Qiagen)	Bach Mai Hospital, Hanoi (BMH)	clinical	2017-07-24	Illumina HiSeq X10 machine	155	CR	3456250	151	113.182	14	158.746
BMP539	Roberts et al., 2022	QIACube and QIAamp 96 DNA QIACube HT kit (Qiagen)	Bach Mai Hospital, Hanoi (BMH)	clinical	2017-07-24	Illumina HiSeq X10 machine	155	ESBL	3655524	151	119.707	7	25.005
BMP777	Roberts et al., 2022	QIACube and QIAamp 96 DNA QIACube HT kit (Qiagen)	Bach Mai Hospital, Hanoi (BMH)	clinical	2017-08-10	Illumina HiSeq X10 machine	206	CR	4331940	151	141.858	12	111.341
BMP780	Roberts et al., 2022	QIACube and QIAamp 96 DNA QIACube HT kit (Qiagen)	Bach Mai Hospital, Hanoi (BMH)	clinical	2017-08-10	Illumina HiSeq X10 machine	206	ESBL	3842380	151	125.826	13	135.858
BMP549	Roberts et al., 2022	QIACube and QIAamp 96 DNA QIACube HT kit (Qiagen)	Bach Mai Hospital, Hanoi (BMH)	clinical	2017-07-25	Illumina HiSeq X10 machine	361	ESBL	4141748	151	135.63	60	1438.95
BMP550	Roberts et al., 2022	QIACube and QIAamp 96 DNA QIACube HT kit (Qiagen)	Bach Mai Hospital, Hanoi (BMH)	clinical	2017-07-25	Illumina HiSeq X10 machine	1193	ESBL	4055240	151	132.797	24	188.779
BMP616	Roberts et al., 2022	QIACube and QIAamp 96 DNA QIACube HT kit (Qiagen)	Bach Mai Hospital, Hanoi (BMH)	clinical	2017-07-27	Illumina HiSeq X10 machine	1193	ESBL	3368366	151	110.304	44	1589.03
BMP703	Roberts et al., 2022	QIACube and QIAamp 96 DNA QIACube HT kit (Qiagen)	Bach Mai Hospital, Hanoi (BMH)	clinical	2017-08-03	Illumina HiSeq X10 machine	1193	ESBL	4379454	151	143.414	28	391.046
BMP556	Roberts et al., 2022	QIACube and QIAamp 96 DNA QIACube HT kit (Qiagen)	Bach Mai Hospital, Hanoi (BMH)	clinical	2017-07-25	Illumina HiSeq X10 machine	131	ESBL	3582710	151	117.323	17	165.288
BMP559	Roberts et al., 2022	QIACube and QIAamp 96 DNA QIACube HT kit (Qiagen)	Bach Mai Hospital, Hanoi (BMH)	clinical	2017-07-25	Illumina HiSeq X10 machine	131	ESBL	4218740	151	138.151	20	121.082
BMP562	Roberts et al., 2022	QIACube and QIAamp 96 DNA QIACube HT kit (Qiagen)	Bach Mai Hospital, Hanoi (BMH)	clinical	2017-07-25	Illumina HiSeq X10 machine	131	CR	4101998	151	134.328	27	217.153
BMP586	Roberts et al., 2022	QIACube and QIAamp 96 DNA QIACube HT kit (Qiagen)	Bach Mai Hospital, Hanoi (BMH)	clinical	2017-07-26	Illumina HiSeq X10 machine	131	ESBL	3874192	151	126.868	22	176.452
BMP618	Roberts et al., 2022	QIACube and QIAamp 96 DNA QIACube HT kit (Qiagen)	Bach Mai Hospital, Hanoi (BMH)	clinical	2017-07-27	Illumina HiSeq X10 machine	141	ESBL	3789982	151	124.11	5	67.857
BMP619	Roberts et al., 2022	QIACube and QIAamp 96 DNA QIACube HT kit (Qiagen)	Bach Mai Hospital, Hanoi (BMH)	clinical	2017-07-27	Illumina HiSeq X10 machine	155	ESBL	4239884	151	138.843	35	222.79
BMP663	Roberts et al., 2022	QIACube and QIAamp 96 DNA QIACube HT kit (Qiagen)	Bach Mai Hospital, Hanoi (BMH)	clinical	2017-07-28	Illumina HiSeq X10 machine	155	ESBL	3770090	151	123.459	33	239.439
BMP589	Roberts et al., 2022	QIACube and QIAamp 96 DNA QIACube HT kit (Qiagen)	Bach Mai Hospital, Hanoi (BMH)	clinical	2017-07-26	Illumina HiSeq X10 machine	405	ESBL	3797534	151	124.358	6	136.144
BMP591	Roberts et al., 2022	QIACube and QIAamp 96 DNA QIACube HT kit (Qiagen)	Bach Mai Hospital, Hanoi (BMH)	clinical	2017-07-26	Illumina HiSeq X10 machine	405	CR	4433308	151	145.177	6	136.337
BMP683	Roberts et al., 2022	QIACube and QIAamp 96 DNA QIACube HT kit (Qiagen)	Bach Mai Hospital, Hanoi (BMH)	clinical	2017-08-01	Illumina HiSeq X10 machine	44	ESBL	4739808	151	155.214	22	129.237
BMP692	Roberts et al., 2022	QIACube and QIAamp 96 DNA QIACube HT kit (Qiagen)	Bach Mai Hospital, Hanoi (BMH)	clinical	2017-08-01	Illumina HiSeq X10 machine	2171	ESBL	4503678	151	147.482	56	846.174
BMP624	Roberts et al., 2022	QIACube and QIAamp 96 DNA QIACube HT kit (Qiagen)	Bach Mai Hospital, Hanoi (BMH)	clinical	2017-07-27	Illumina HiSeq X10 machine	167	ESBL	1913830	151	62.6721	7	80.123
BMP710	Roberts et al., 2022	QIACube and QIAamp 96 DNA QIACube HT kit (Qiagen)	Bach Mai Hospital, Hanoi (BMH)	clinical	2017-08-03	Illumina HiSeq X10 machine	167	ESBL	4249302	151	139.152	24	324.932
BMP664	Roberts et al., 2022	QIACube and QIAamp 96 DNA QIACube HT kit (Qiagen)	Bach Mai Hospital, Hanoi (BMH)	clinical	2017-07-28	Illumina HiSeq X10 machine	58	ESBL	2524244	151	82.6613	2	6.01
BMP720	Roberts et al., 2022	QIACube and QIAamp 96 DNA QIACube HT kit (Qiagen)	Bach Mai Hospital, Hanoi (BMH)	clinical	2017-08-03	Illumina HiSeq X10 machine	131	ESBL	4897686	151	160.384	6	22.386
BMP669	Roberts et al., 2022	QIACube and QIAamp 96 DNA QIACube HT kit (Qiagen)	Bach Mai Hospital, Hanoi (BMH)	clinical	2017-07-29	Illumina HiSeq X10 machine	1722	ESBL	3862310	151	126.479	6	62.558
BMP673	Roberts et al., 2022	QIACube and QIAamp 96 DNA QIACube HT kit (Qiagen)	Bach Mai Hospital, Hanoi (BMH)	clinical	2017-07-29	Illumina HiSeq X10 machine	648	ESBL	2313096	151	75.7469	20	378.835
BMP694	Roberts et al., 2022	QIACube and QIAamp 96 DNA QIACube HT kit (Qiagen)	Bach Mai Hospital, Hanoi (BMH)	clinical	2017-08-02	Illumina HiSeq X10 machine	648	ESBL	4578558	151	149.934	17	105.682
BMP686	Roberts et al., 2022	QIACube and QIAamp 96 DNA QIACube HT kit (Qiagen)	Bach Mai Hospital, Hanoi (BMH)	clinical	2017-08-01	Illumina HiSeq X10 machine	131	ESBL	4463268	151	146.158	24	159.302
BMP729	Roberts et al., 2022	QIACube and QIAamp 96 DNA QIACube HT kit (Qiagen)	Bach Mai Hospital, Hanoi (BMH)	clinical	2017-08-03	Illumina HiSeq X10 machine	131	ESBL	4698556	151	153.863	28	271.972
BMP770	Roberts et al., 2022	QIACube and QIAamp 96 DNA QIACube HT kit (Qiagen)	Bach Mai Hospital, Hanoi (BMH)	clinical	2017-08-09	Illumina HiSeq X10 machine	131	ESBL	3583690	151	117.355	27	297.425
BMP687	Roberts et al., 2022	QIACube and QIAamp 96 DNA QIACube HT kit (Qiagen)	Bach Mai Hospital, Hanoi (BMH)	clinical	2017-08-01	Illumina HiSeq X10 machine	10	ESBL	4371434	151	143.151	33	277.282
BMP688	Roberts et al., 2022	QIACube and QIAamp 96 DNA QIACube HT kit (Qiagen)	Bach Mai Hospital, Hanoi (BMH)	clinical	2017-08-01	Illumina HiSeq X10 machine	10	ESBL	4945730	151	161.958	23	235.784
BMP752	Roberts et al., 2022	QIACube and QIAamp 96 DNA QIACube HT kit (Qiagen)	Bach Mai Hospital, Hanoi (BMH)	clinical	2017-08-03	Illumina HiSeq X10 machine	10	ESBL	4477516	151	146.625	24	87.101
BMP730	Roberts et al., 2022	QIACube and QIAamp 96 DNA QIACube HT kit (Qiagen)	Bach Mai Hospital, Hanoi (BMH)	clinical	2017-08-03	Illumina HiSeq X10 machine	349	ESBL	2990760	151	97.9383	17	128.499
BMP733	Roberts et al., 2022	QIACube and QIAamp 96 DNA QIACube HT kit (Qiagen)	Bach Mai Hospital, Hanoi (BMH)	clinical	2017-08-03	Illumina HiSeq X10 machine	648	ESBL	4319222	151	141.441	11	116.434
BMP736	Roberts et al., 2022	QIACube and QIAamp 96 DNA QIACube HT kit (Qiagen)	Bach Mai Hospital, Hanoi (BMH)	clinical	2017-08-03	Illumina HiSeq X10 machine	1193	ESBL	4174284	151	136.695	14	52.42
BMP792	Roberts et al., 2022	QIACube and QIAamp 96 DNA QIACube HT kit (Qiagen)	Bach Mai Hospital, Hanoi (BMH)	clinical	2017-08-10	Illumina HiSeq X10 machine	1193	ESBL	4571248	151	149.694	22	312.294
BMP789	Roberts et al., 2022	QIACube and QIAamp 96 DNA QIACube HT kit (Qiagen)	Bach Mai Hospital, Hanoi (BMH)	clinical	2017-08-10	Illumina HiSeq X10 machine	1193	ESBL	4226502	151	138.405	13	81.703
BMP866	Roberts et al., 2022	QIACube and QIAamp 96 DNA QIACube HT kit (Qiagen)	Bach Mai Hospital, Hanoi (BMH)	clinical	2017-08-17	Illumina HiSeq X10 machine	1193	ESBL	4152526	151	135.983	30	231.127
BMP868	Roberts et al., 2022	QIACube and QIAamp 96 DNA QIACube HT kit (Qiagen)	Bach Mai Hospital, Hanoi (BMH)	clinical	2017-08-17	Illumina HiSeq X10 machine	1193	ESBL	4070090	151	133.283	28	175.366
BMP921	Roberts et al., 2022	QIACube and QIAamp 96 DNA QIACube HT kit (Qiagen)	Bach Mai Hospital, Hanoi (BMH)	clinical	2017-08-21	Illumina HiSeq X10 machine	648	ESBL	4183042	151	136.982	5	111.712
BMP923	Roberts et al., 2022	QIACube and QIAamp 96 DNA QIACube HT kit (Qiagen)	Bach Mai Hospital, Hanoi (BMH)	clinical	2017-08-21	Illumina HiSeq X10 machine	648	ESBL	4159076	151	136.197	17	231.379
BMP743	Roberts et al., 2022	QIACube and QIAamp 96 DNA QIACube HT kit (Qiagen)	Bach Mai Hospital, Hanoi (BMH)	clinical	2017-08-03	Illumina HiSeq X10 machine	1286	ESBL	4527852	151	148.273	66	352.281
BMP747	Roberts et al., 2022	QIACube and QIAamp 96 DNA QIACube HT kit (Qiagen)	Bach Mai Hospital, Hanoi (BMH)	clinical	2017-08-03	Illumina HiSeq X10 machine	131	ESBL	4146216	151	135.776	8	480.432
BMP749	Roberts et al., 2022	QIACube and QIAamp 96 DNA QIACube HT kit (Qiagen)	Bach Mai Hospital, Hanoi (BMH)	clinical	2017-08-03	Illumina HiSeq X10 machine	131	CR	4150506	151	135.916	69	154.344
BMP750	Roberts et al., 2022	QIACube and QIAamp 96 DNA QIACube HT kit (Qiagen)	Bach Mai Hospital, Hanoi (BMH)	clinical	2017-08-03	Illumina HiSeq X10 machine	131	ESBL	4263602	151	139.62	48	115.05
BMP751	Roberts et al., 2022	QIACube and QIAamp 96 DNA QIACube HT kit (Qiagen)	Bach Mai Hospital, Hanoi (BMH)	clinical	2017-08-03	Illumina HiSeq X10 machine	1163	ESBL	3917136	151	128.274	5	15.968
BMP827	Roberts et al., 2022	QIACube and QIAamp 96 DNA QIACube HT kit (Qiagen)	Bach Mai Hospital, Hanoi (BMH)	clinical	2017-08-10	Illumina HiSeq X10 machine	617	ESBL	2327838	151	76.2296	43	287.517
BMP959	Roberts et al., 2022	QIACube and QIAamp 96 DNA QIACube HT kit (Qiagen)	Bach Mai Hospital, Hanoi (BMH)	clinical	2017-08-24	Illumina HiSeq X10 machine	8346	CR	4140722	151	135.596	8	108.254
BMP960	Roberts et al., 2022	QIACube and QIAamp 96 DNA QIACube HT kit (Qiagen)	Bach Mai Hospital, Hanoi (BMH)	clinical	2017-08-24	Illumina HiSeq X10 machine	8346	ESBL	4109066	151	134.559	8	108.242
BMP835	Roberts et al., 2022	QIACube and QIAamp 96 DNA QIACube HT kit (Qiagen)	Bach Mai Hospital, Hanoi (BMH)	clinical	2017-08-10	Illumina HiSeq X10 machine	6707	ESBL	4357574	151	142.697	6	18.79
BMP767	Roberts et al., 2022	QIACube and QIAamp 96 DNA QIACube HT kit (Qiagen)	Bach Mai Hospital, Hanoi (BMH)	clinical	2017-08-08	Illumina HiSeq X10 machine	10	CR	2442758	151	79.9929	29	187.444
BMP775	Roberts et al., 2022	QIACube and QIAamp 96 DNA QIACube HT kit (Qiagen)	Bach Mai Hospital, Hanoi (BMH)	clinical	2017-08-09	Illumina HiSeq X10 machine	1193	CR	2626732	151	86.0175	10	180.971
BMP838	Roberts et al., 2022	QIACube and QIAamp 96 DNA QIACube HT kit (Qiagen)	Bach Mai Hospital, Hanoi (BMH)	clinical	2017-08-10	Illumina HiSeq X10 machine	1193	ESBL	2399648	151	78.5812	4	101.027
BMP877	Roberts et al., 2022	QIACube and QIAamp 96 DNA QIACube HT kit (Qiagen)	Bach Mai Hospital, Hanoi (BMH)	clinical	2017-08-17	Illumina HiSeq X10 machine	410	CR	3993322	151	130.769	22	174.314
BMP840	Roberts et al., 2022	QIACube and QIAamp 96 DNA QIACube HT kit (Qiagen)	Bach Mai Hospital, Hanoi (BMH)	clinical	2017-08-10	Illumina HiSeq X10 machine	10	ESBL	4284904	151	140.318	8	89.322
BMP843	Roberts et al., 2022	QIACube and QIAamp 96 DNA QIACube HT kit (Qiagen)	Bach Mai Hospital, Hanoi (BMH)	clinical	2017-08-11	Illumina HiSeq X10 machine	648	ESBL	4665228	151	152.772	47	190.841
BMP844	Roberts et al., 2022	QIACube and QIAamp 96 DNA QIACube HT kit (Qiagen)	Bach Mai Hospital, Hanoi (BMH)	clinical	2017-08-11	Illumina HiSeq X10 machine	648	ESBL	4049802	151	132.619	51	219.286
BMP845	Roberts et al., 2022	QIACube and QIAamp 96 DNA QIACube HT kit (Qiagen)	Bach Mai Hospital, Hanoi (BMH)	clinical	2017-08-11	Illumina HiSeq X10 machine	648	CR	4258176	151	139.442	30	124.505
BMP887	Roberts et al., 2022	QIACube and QIAamp 96 DNA QIACube HT kit (Qiagen)	Bach Mai Hospital, Hanoi (BMH)	clinical	2017-08-17	Illumina HiSeq X10 machine	648	ESBL	4454002	151	145.855	43	135.67
BMP889	Roberts et al., 2022	QIACube and QIAamp 96 DNA QIACube HT kit (Qiagen)	Bach Mai Hospital, Hanoi (BMH)	clinical	2017-08-17	Illumina HiSeq X10 machine	1193	ESBL	2670272	151	87.4433	10	24.379
BMP927	Roberts et al., 2022	QIACube and QIAamp 96 DNA QIACube HT kit (Qiagen)	Bach Mai Hospital, Hanoi (BMH)	clinical	2017-08-21	Illumina HiSeq X10 machine	648	CR	4092704	151	134.024	67	186.722
BMP932	Roberts et al., 2022	QIACube and QIAamp 96 DNA QIACube HT kit (Qiagen)	Bach Mai Hospital, Hanoi (BMH)	clinical	2017-08-21	Illumina HiSeq X10 machine	648	CR	4546316	151	148.878	56	208.939
BMP924	Roberts et al., 2022	QIACube and QIAamp 96 DNA QIACube HT kit (Qiagen)	Bach Mai Hospital, Hanoi (BMH)	clinical	2017-08-21	Illumina HiSeq X10 machine	648	ESBL	4381362	151	143.476	55	203.489
BMP930	Roberts et al., 2022	QIACube and QIAamp 96 DNA QIACube HT kit (Qiagen)	Bach Mai Hospital, Hanoi (BMH)	clinical	2017-08-21	Illumina HiSeq X10 machine	1193	ESBL	2273030	151	74.4348	10	24.379
BMP852	Roberts et al., 2022	QIACube and QIAamp 96 DNA QIACube HT kit (Qiagen)	Bach Mai Hospital, Hanoi (BMH)	clinical	2017-08-11	Illumina HiSeq X10 machine	708	ESBL	4330128	151	141.799	18	116.081
BMP854	Roberts et al., 2022	QIACube and QIAamp 96 DNA QIACube HT kit (Qiagen)	Bach Mai Hospital, Hanoi (BMH)	clinical	2017-08-10	Illumina HiSeq X10 machine	410	ESBL	4144814	151	135.73	29	594.851
BMP862	Roberts et al., 2022	QIACube and QIAamp 96 DNA QIACube HT kit (Qiagen)	Bach Mai Hospital, Hanoi (BMH)	clinical	2017-08-15	Illumina HiSeq X10 machine	624	ESBL	4475148	151	146.547	5	29.072
BMP902	Roberts et al., 2022	QIACube and QIAamp 96 DNA QIACube HT kit (Qiagen)	Bach Mai Hospital, Hanoi (BMH)	clinical	2017-08-17	Illumina HiSeq X10 machine	5150	ESBL	4131824	151	135.305	35	355.886
BMP903	Roberts et al., 2022	QIACube and QIAamp 96 DNA QIACube HT kit (Qiagen)	Bach Mai Hospital, Hanoi (BMH)	clinical	2017-08-17	Illumina HiSeq X10 machine	648	ESBL	4012428	151	131.395	1	112.857
BMP904	Roberts et al., 2022	QIACube and QIAamp 96 DNA QIACube HT kit (Qiagen)	Bach Mai Hospital, Hanoi (BMH)	clinical	2017-08-17	Illumina HiSeq X10 machine	648	CR	3990902	151	130.69	3	123.22
BMP906	Roberts et al., 2022	QIACube and QIAamp 96 DNA QIACube HT kit (Qiagen)	Bach Mai Hospital, Hanoi (BMH)	clinical	2017-08-18	Illumina HiSeq X10 machine	4681	CR	3853318	151	126.184	1	4.895
BMP949	Roberts et al., 2022	QIACube and QIAamp 96 DNA QIACube HT kit (Qiagen)	Bach Mai Hospital, Hanoi (BMH)	clinical	2017-08-23	Illumina HiSeq X10 machine	410	ESBL	4268536	151	139.782	12	42.321
BMP951	Roberts et al., 2022	QIACube and QIAamp 96 DNA QIACube HT kit (Qiagen)	Bach Mai Hospital, Hanoi (BMH)	clinical	2017-08-23	Illumina HiSeq X10 machine	10	CR	4465576	151	146.234	39	343.203
BMP946	Roberts et al., 2022	QIACube and QIAamp 96 DNA QIACube HT kit (Qiagen)	Bach Mai Hospital, Hanoi (BMH)	clinical	2017-08-21	Illumina HiSeq X10 machine	44	ESBL	4714996	151	154.402	27	287.353
BMP913	Roberts et al., 2022	QIACube and QIAamp 96 DNA QIACube HT kit (Qiagen)	Bach Mai Hospital, Hanoi (BMH)	clinical	2017-08-19	Illumina HiSeq X10 machine	167	CR	4242870	151	138.941	25	132.701
BMP983	Roberts et al., 2022	QIACube and QIAamp 96 DNA QIACube HT kit (Qiagen)	Bach Mai Hospital, Hanoi (BMH)	clinical	2017-08-24	Illumina HiSeq X10 machine	648	ESBL	4395102	151	143.926	10	137.601
BMP1009	Roberts et al., 2022	QIACube and QIAamp 96 DNA QIACube HT kit (Qiagen)	Bach Mai Hospital, Hanoi (BMH)	clinical	2017-08-29	Illumina HiSeq X10 machine	648	CR	4451048	151	145.758	22	177.31
BMP916	Roberts et al., 2022	QIACube and QIAamp 96 DNA QIACube HT kit (Qiagen)	Bach Mai Hospital, Hanoi (BMH)	clinical	2017-08-19	Illumina HiSeq X10 machine	410	ESBL	3950746	151	129.375	14	52.804
BMP917	Roberts et al., 2022	QIACube and QIAamp 96 DNA QIACube HT kit (Qiagen)	Bach Mai Hospital, Hanoi (BMH)	clinical	2017-08-19	Illumina HiSeq X10 machine	617	ESBL	2255704	151	73.8675	20	39.776
BMP984	Roberts et al., 2022	QIACube and QIAamp 96 DNA QIACube HT kit (Qiagen)	Bach Mai Hospital, Hanoi (BMH)	clinical	2017-08-24	Illumina HiSeq X10 machine	167	ESBL	2205572	151	72.2258	12	172.862
BMP987	Roberts et al., 2022	QIACube and QIAamp 96 DNA QIACube HT kit (Qiagen)	Bach Mai Hospital, Hanoi (BMH)	clinical	2017-08-24	Illumina HiSeq X10 machine	167	ESBL	2129966	151	69.7499	25	697.503
BMP952	Roberts et al., 2022	QIACube and QIAamp 96 DNA QIACube HT kit (Qiagen)	Bach Mai Hospital, Hanoi (BMH)	clinical	2017-08-23	Illumina HiSeq X10 machine	1193	ESBL	2479514	151	81.1965	17	79.01
BMP988	Roberts et al., 2022	QIACube and QIAamp 96 DNA QIACube HT kit (Qiagen)	Bach Mai Hospital, Hanoi (BMH)	clinical	2017-08-24	Illumina HiSeq X10 machine	10	ESBL	2203090	151	72.1445	3	8.348
BMP989	Roberts et al., 2022	QIACube and QIAamp 96 DNA QIACube HT kit (Qiagen)	Bach Mai Hospital, Hanoi (BMH)	clinical	2017-08-24	Illumina HiSeq X10 machine	10	ESBL	4649732	151	152.265	12	86.017
BMP953	Roberts et al., 2022	QIACube and QIAamp 96 DNA QIACube HT kit (Qiagen)	Bach Mai Hospital, Hanoi (BMH)	clinical	2017-08-23	Illumina HiSeq X10 machine	1193	ESBL	2446890	151	80.1282	14	65.803
BMP1031	Roberts et al., 2022	QIACube and QIAamp 96 DNA QIACube HT kit (Qiagen)	Bach Mai Hospital, Hanoi (BMH)	clinical	2017-08-28	Illumina HiSeq X10 machine	405	CR	3867084	151	126.635	15	218.552
BMP955	Roberts et al., 2022	QIACube and QIAamp 96 DNA QIACube HT kit (Qiagen)	Bach Mai Hospital, Hanoi (BMH)	clinical	2017-08-23	Illumina HiSeq X10 machine	1722	ESBL	4087996	151	133.869	48	222.106
BMP990	Roberts et al., 2022	QIACube and QIAamp 96 DNA QIACube HT kit (Qiagen)	Bach Mai Hospital, Hanoi (BMH)	clinical	2017-08-24	Illumina HiSeq X10 machine	617	ESBL	2045316	151	66.9779	7	75.732
BMP991	Roberts et al., 2022	QIACube and QIAamp 96 DNA QIACube HT kit (Qiagen)	Bach Mai Hospital, Hanoi (BMH)	clinical	2017-08-24	Illumina HiSeq X10 machine	617	ESBL	2148112	151	70.3441	4	18.786
BMP992	Roberts et al., 2022	QIACube and QIAamp 96 DNA QIACube HT kit (Qiagen)	Bach Mai Hospital, Hanoi (BMH)	clinical	2017-08-24	Illumina HiSeq X10 machine	648	ESBL	4083872	151	133.734	17	227.509
BMP995	Roberts et al., 2022	QIACube and QIAamp 96 DNA QIACube HT kit (Qiagen)	Bach Mai Hospital, Hanoi (BMH)	clinical	2017-08-25	Illumina HiSeq X10 machine	46	ESBL	3823470	151	125.207	22	213.942
BMP996	Roberts et al., 2022	QIACube and QIAamp 96 DNA QIACube HT kit (Qiagen)	Bach Mai Hospital, Hanoi (BMH)	clinical	2017-08-25	Illumina HiSeq X10 machine	2011	CR	4122592	151	135.002	45	287.113
BMP997	Roberts et al., 2022	QIACube and QIAamp 96 DNA QIACube HT kit (Qiagen)	Bach Mai Hospital, Hanoi (BMH)	clinical	2017-08-26	Illumina HiSeq X10 machine	410	ESBL	3939536	151	129.008	20	73.81
BMP998	Roberts et al., 2022	QIACube and QIAamp 96 DNA QIACube HT kit (Qiagen)	Bach Mai Hospital, Hanoi (BMH)	clinical	2017-08-26	Illumina HiSeq X10 machine	410	CR	3830352	151	125.432	18	203.627
BMP1000	Roberts et al., 2022	QIACube and QIAamp 96 DNA QIACube HT kit (Qiagen)	Bach Mai Hospital, Hanoi (BMH)	clinical	2017-08-26	Illumina HiSeq X10 machine	1193	ESBL	3712516	151	121.574	14	76.183
BMP1032	Roberts et al., 2022	QIACube and QIAamp 96 DNA QIACube HT kit (Qiagen)	Bach Mai Hospital, Hanoi (BMH)	clinical	2017-08-28	Illumina HiSeq X10 machine	131	ESBL	3566656	151	116.797	18	44.896
BMP1018	Roberts et al., 2022	QIACube and QIAamp 96 DNA QIACube HT kit (Qiagen)	Bach Mai Hospital, Hanoi (BMH)	clinical	2017-08-29	Illumina HiSeq X10 machine	617	ESBL	3764114	151	123.263	80	141.776
BMP1022	Roberts et al., 2022	QIACube and QIAamp 96 DNA QIACube HT kit (Qiagen)	Bach Mai Hospital, Hanoi (BMH)	clinical	2017-08-29	Illumina HiSeq X10 machine	1324	ESBL	4286784	151	140.379	45	401.929
BMP1059	Roberts et al., 2022	QIACube and QIAamp 96 DNA QIACube HT kit (Qiagen)	Bach Mai Hospital, Hanoi (BMH)	clinical	2017-08-31	Illumina HiSeq X10 machine	1324	ESBL	3965938	151	129.872	39	462.329
BMP1139	Roberts et al., 2022	QIACube and QIAamp 96 DNA QIACube HT kit (Qiagen)	Bach Mai Hospital, Hanoi (BMH)	clinical	2017-09-07	Illumina HiSeq X10 machine	617	ESBL	4482868	151	146.8	91	190.587
BMP1061	Roberts et al., 2022	QIACube and QIAamp 96 DNA QIACube HT kit (Qiagen)	Bach Mai Hospital, Hanoi (BMH)	clinical	2017-08-31	Illumina HiSeq X10 machine	410	ESBL	4685140	151	153.424	21	86.134
BMP1062	Roberts et al., 2022	QIACube and QIAamp 96 DNA QIACube HT kit (Qiagen)	Bach Mai Hospital, Hanoi (BMH)	clinical	2017-08-31	Illumina HiSeq X10 machine	410	ESBL	4715738	151	154.426	37	580.546
BMP1024	Roberts et al., 2022	QIACube and QIAamp 96 DNA QIACube HT kit (Qiagen)	Bach Mai Hospital, Hanoi (BMH)	clinical	2017-08-29	Illumina HiSeq X10 machine	448	ESBL	3669726	151	120.172	19	165.025
BMP1028	Roberts et al., 2022	QIACube and QIAamp 96 DNA QIACube HT kit (Qiagen)	Bach Mai Hospital, Hanoi (BMH)	clinical	2017-08-29	Illumina HiSeq X10 machine	648	ESBL	3704902	151	121.324	12	143.163
BMP1066	Roberts et al., 2022	QIACube and QIAamp 96 DNA QIACube HT kit (Qiagen)	Bach Mai Hospital, Hanoi (BMH)	clinical	2017-08-31	Illumina HiSeq X10 machine	453	ESBL	4699282	151	153.887	14	57.484
BMP1143	Roberts et al., 2022	QIACube and QIAamp 96 DNA QIACube HT kit (Qiagen)	Bach Mai Hospital, Hanoi (BMH)	clinical	2017-09-07	Illumina HiSeq X10 machine	617	ESBL	3757230	151	123.038	72	339.296
BMP1033	Roberts et al., 2022	QIACube and QIAamp 96 DNA QIACube HT kit (Qiagen)	Bach Mai Hospital, Hanoi (BMH)	clinical	2017-08-30	Illumina HiSeq X10 machine	457	CR	3421808	151	112.054	16	277.489
BMP1034	Roberts et al., 2022	QIACube and QIAamp 96 DNA QIACube HT kit (Qiagen)	Bach Mai Hospital, Hanoi (BMH)	clinical	2017-08-30	Illumina HiSeq X10 machine	405	ESBL	3858540	151	126.355	19	332.835
BMP1035	Roberts et al., 2022	QIACube and QIAamp 96 DNA QIACube HT kit (Qiagen)	Bach Mai Hospital, Hanoi (BMH)	clinical	2017-08-30	Illumina HiSeq X10 machine	405	ESBL	3752806	151	122.893	21	345.229
BMP1068	Roberts et al., 2022	QIACube and QIAamp 96 DNA QIACube HT kit (Qiagen)	Bach Mai Hospital, Hanoi (BMH)	clinical	2017-08-31	Illumina HiSeq X10 machine	1081	ESBL	4486000	151	146.903	7	181.274
BMP1070	Roberts et al., 2022	QIACube and QIAamp 96 DNA QIACube HT kit (Qiagen)	Bach Mai Hospital, Hanoi (BMH)	clinical	2017-08-31	Illumina HiSeq X10 machine	1081	CR	4136322	151	135.452	8	124.8
BMP1160	Roberts et al., 2022	QIACube and QIAamp 96 DNA QIACube HT kit (Qiagen)	Bach Mai Hospital, Hanoi (BMH)	clinical	2017-09-08	Illumina HiSeq X10 machine	1081	ESBL	3866282	151	126.609	7	361.818
BMP1071	Roberts et al., 2022	QIACube and QIAamp 96 DNA QIACube HT kit (Qiagen)	Bach Mai Hospital, Hanoi (BMH)	clinical	2017-08-31	Illumina HiSeq X10 machine	648	ESBL	4560058	151	149.328	7	164.422
BMP1154	Roberts et al., 2022	QIACube and QIAamp 96 DNA QIACube HT kit (Qiagen)	Bach Mai Hospital, Hanoi (BMH)	clinical	2017-09-07	Illumina HiSeq X10 machine	648	CR	4049310	151	132.603	8	198.243
BMP1116	Roberts et al., 2022	QIACube and QIAamp 96 DNA QIACube HT kit (Qiagen)	Bach Mai Hospital, Hanoi (BMH)	clinical	2017-09-02	Illumina HiSeq X10 machine	648	CR	4387718	151	143.684	47	1228.72
BMP1195	Roberts et al., 2022	QIACube and QIAamp 96 DNA QIACube HT kit (Qiagen)	Bach Mai Hospital, Hanoi (BMH)	clinical	2017-09-14	Illumina HiSeq X10 machine	224	ESBL	4016360	151	131.524	18	117.194
BMP1121	Roberts et al., 2022	QIACube and QIAamp 96 DNA QIACube HT kit (Qiagen)	Bach Mai Hospital, Hanoi (BMH)	clinical	2017-09-05	Illumina HiSeq X10 machine	1722	ESBL	3955620	151	129.535	31	698.103
BMP1122	Roberts et al., 2022	QIACube and QIAamp 96 DNA QIACube HT kit (Qiagen)	Bach Mai Hospital, Hanoi (BMH)	clinical	2017-09-05	Illumina HiSeq X10 machine	410	ESBL	3739678	151	122.463	44	1028.2
BMP1128	Roberts et al., 2022	QIACube and QIAamp 96 DNA QIACube HT kit (Qiagen)	Bach Mai Hospital, Hanoi (BMH)	clinical	2017-09-06	Illumina HiSeq X10 machine	1193	ESBL	2229760	151	73.0179	25	100.803
BMP1132	Roberts et al., 2022	QIACube and QIAamp 96 DNA QIACube HT kit (Qiagen)	Bach Mai Hospital, Hanoi (BMH)	clinical	2017-09-06	Illumina HiSeq X10 machine	2170	CR	3833396	151	125.532	24	969.582
BMP1166	Roberts et al., 2022	QIACube and QIAamp 96 DNA QIACube HT kit (Qiagen)	Bach Mai Hospital, Hanoi (BMH)	clinical	2017-09-08	Illumina HiSeq X10 machine	2170	ESBL	4123810	151	135.042	25	1199.83
BMP1157	Roberts et al., 2022	QIACube and QIAamp 96 DNA QIACube HT kit (Qiagen)	Bach Mai Hospital, Hanoi (BMH)	clinical	2017-09-07	Illumina HiSeq X10 machine	156	ESBL	4030394	151	131.983	26	719.011
BMP1167	Roberts et al., 2022	QIACube and QIAamp 96 DNA QIACube HT kit (Qiagen)	Bach Mai Hospital, Hanoi (BMH)	clinical	2017-09-08	Illumina HiSeq X10 machine	1722	ESBL	3975814	151	130.196	21	324.604
BMP1168	Roberts et al., 2022	QIACube and QIAamp 96 DNA QIACube HT kit (Qiagen)	Bach Mai Hospital, Hanoi (BMH)	clinical	2017-09-09	Illumina HiSeq X10 machine	1722	CR	3753720	151	122.923	16	224.617
BMP1178	Roberts et al., 2022	QIACube and QIAamp 96 DNA QIACube HT kit (Qiagen)	Bach Mai Hospital, Hanoi (BMH)	clinical	2017-09-11	Illumina HiSeq X10 machine	648	ESBL	3570870	151	116.935	30	202.224
BMP1207	Roberts et al., 2022	QIACube and QIAamp 96 DNA QIACube HT kit (Qiagen)	Bach Mai Hospital, Hanoi (BMH)	clinical	2017-09-14	Illumina HiSeq X10 machine	1421	CR	4013462	151	131.429	22	185.236
BMP1218	Roberts et al., 2022	QIACube and QIAamp 96 DNA QIACube HT kit (Qiagen)	Bach Mai Hospital, Hanoi (BMH)	clinical	2017-09-13	Illumina HiSeq X10 machine	405	ESBL	4391732	151	143.816	20	461.758
BMP1220	Roberts et al., 2022	QIACube and QIAamp 96 DNA QIACube HT kit (Qiagen)	Bach Mai Hospital, Hanoi (BMH)	clinical	2017-09-13	Illumina HiSeq X10 machine	405	ESBL	5244584	151	171.744	8	230.224
BMP1247	Roberts et al., 2022	QIACube and QIAamp 96 DNA QIACube HT kit (Qiagen)	Bach Mai Hospital, Hanoi (BMH)	clinical	2017-09-20	Illumina HiSeq X10 machine	405	ESBL	4591790	151	150.367	11	92.1
BMP1250	Roberts et al., 2022	QIACube and QIAamp 96 DNA QIACube HT kit (Qiagen)	Bach Mai Hospital, Hanoi (BMH)	clinical	2017-09-20	Illumina HiSeq X10 machine	405	ESBL	4200466	151	137.552	11	92.1
BMP1184	Roberts et al., 2022	QIACube and QIAamp 96 DNA QIACube HT kit (Qiagen)	Bach Mai Hospital, Hanoi (BMH)	clinical	2017-09-13	Illumina HiSeq X10 machine	648	ESBL	3713574	151	121.608	23	196.996
BMP1185	Roberts et al., 2022	QIACube and QIAamp 96 DNA QIACube HT kit (Qiagen)	Bach Mai Hospital, Hanoi (BMH)	clinical	2017-09-13	Illumina HiSeq X10 machine	648	ESBL	3091390	151	101.234	26	195.692
BMP1187	Roberts et al., 2022	QIACube and QIAamp 96 DNA QIACube HT kit (Qiagen)	Bach Mai Hospital, Hanoi (BMH)	clinical	2017-09-13	Illumina HiSeq X10 machine	206	ESBL	3851704	151	126.132	13	101.191
BMP1231	Roberts et al., 2022	QIACube and QIAamp 96 DNA QIACube HT kit (Qiagen)	Bach Mai Hospital, Hanoi (BMH)	clinical	2017-09-16	Illumina HiSeq X10 machine	648	ESBL	3804502	151	124.586	30	375.785
BMP1234	Roberts et al., 2022	QIACube and QIAamp 96 DNA QIACube HT kit (Qiagen)	Bach Mai Hospital, Hanoi (BMH)	clinical	2017-09-16	Illumina HiSeq X10 machine	648	ESBL	4493512	151	147.149	26	635.794
BMP1232	Roberts et al., 2022	QIACube and QIAamp 96 DNA QIACube HT kit (Qiagen)	Bach Mai Hospital, Hanoi (BMH)	clinical	2017-09-16	Illumina HiSeq X10 machine	410	ESBL	4318082	151	141.404	16	433.249
BMP1189	Roberts et al., 2022	QIACube and QIAamp 96 DNA QIACube HT kit (Qiagen)	Bach Mai Hospital, Hanoi (BMH)	clinical	2017-09-13	Illumina HiSeq X10 machine	1193	ESBL	3913852	151	128.167	16	71.643
BMP1190	Roberts et al., 2022	QIACube and QIAamp 96 DNA QIACube HT kit (Qiagen)	Bach Mai Hospital, Hanoi (BMH)	clinical	2017-09-13	Illumina HiSeq X10 machine	131	ESBL	3733640	151	122.265	12	76.516
BMP1192	Roberts et al., 2022	QIACube and QIAamp 96 DNA QIACube HT kit (Qiagen)	Bach Mai Hospital, Hanoi (BMH)	clinical	2017-09-13	Illumina HiSeq X10 machine	131	ESBL	3975778	151	130.195	10	44.277
BMP1224	Roberts et al., 2022	QIACube and QIAamp 96 DNA QIACube HT kit (Qiagen)	Bach Mai Hospital, Hanoi (BMH)	clinical	2017-09-15	Illumina HiSeq X10 machine	405	ESBL	4934920	151	161.604	8	125.811
BMP1227	Roberts et al., 2022	QIACube and QIAamp 96 DNA QIACube HT kit (Qiagen)	Bach Mai Hospital, Hanoi (BMH)	clinical	2017-09-15	Illumina HiSeq X10 machine	354	CR	4520086	151	148.019	30	162.4
BMP1229	Roberts et al., 2022	QIACube and QIAamp 96 DNA QIACube HT kit (Qiagen)	Bach Mai Hospital, Hanoi (BMH)	clinical	2017-09-15	Illumina HiSeq X10 machine	224	ESBL	2143604	151	70.1965	9	40.855
BMP1239	Roberts et al., 2022	QIACube and QIAamp 96 DNA QIACube HT kit (Qiagen)	Bach Mai Hospital, Hanoi (BMH)	clinical	2017-09-18	Illumina HiSeq X10 machine	131	CR	4517942	151	147.949	33	334.787
BMP1240	Roberts et al., 2022	QIACube and QIAamp 96 DNA QIACube HT kit (Qiagen)	Bach Mai Hospital, Hanoi (BMH)	clinical	2017-09-19	Illumina HiSeq X10 machine	354	ESBL	4853950	151	158.952	19	140.593
BMP1242	Roberts et al., 2022	QIACube and QIAamp 96 DNA QIACube HT kit (Qiagen)	Bach Mai Hospital, Hanoi (BMH)	clinical	2017-09-19	Illumina HiSeq X10 machine	167	CR	4486832	151	146.93	3	16.045
BMP1243	Roberts et al., 2022	QIACube and QIAamp 96 DNA QIACube HT kit (Qiagen)	Bach Mai Hospital, Hanoi (BMH)	clinical	2017-09-19	Illumina HiSeq X10 machine	131	CR	4816896	151	157.739	9	20.988
NHE001	Roberts et al., 2022	QIACube and QIAamp 96 DNA QIACube HT kit (Qiagen)	National Hospital for Tropical Diseases, Hanoi (NHTD)	env	2017-06-19	Illumina HiSeq X10 machine	38	CR	2680338	151	87.7729	12	153.545
NHE179	Roberts et al., 2022	QIACube and QIAamp 96 DNA QIACube HT kit (Qiagen)	National Hospital for Tropical Diseases, Hanoi (NHTD)	env	2017-10-31	Illumina HiSeq X10 machine	624	CR	2246952	151	73.5809	19	254.06
NHE210	Roberts et al., 2022	QIACube and QIAamp 96 DNA QIACube HT kit (Qiagen)	National Hospital for Tropical Diseases, Hanoi (NHTD)	env	2017-10-31	Illumina HiSeq X10 machine	405	ESBL	2340288	151	76.6373	40	251.887
NHE218	Roberts et al., 2022	QIACube and QIAamp 96 DNA QIACube HT kit (Qiagen)	National Hospital for Tropical Diseases, Hanoi (NHTD)	env	2017-11-26	Illumina HiSeq X10 machine	38	CR	2441012	151	79.9357	0	0
NHE224	Roberts et al., 2022	QIACube and QIAamp 96 DNA QIACube HT kit (Qiagen)	National Hospital for Tropical Diseases, Hanoi (NHTD)	env	2017-11-26	Illumina HiSeq X10 machine	617	ESBL	1858200	151	60.8504	39	220.393
NHE234	Roberts et al., 2022	QIACube and QIAamp 96 DNA QIACube HT kit (Qiagen)	National Hospital for Tropical Diseases, Hanoi (NHTD)	env	2017-11-26	Illumina HiSeq X10 machine	617	ESBL	2299950	151	75.3164	12	129.488
NHE235	Roberts et al., 2022	QIACube and QIAamp 96 DNA QIACube HT kit (Qiagen)	National Hospital for Tropical Diseases, Hanoi (NHTD)	env	2017-11-26	Illumina HiSeq X10 machine	617	CR	2090654	151	68.4626	78	317.063
NHE239	Roberts et al., 2022	QIACube and QIAamp 96 DNA QIACube HT kit (Qiagen)	National Hospital for Tropical Diseases, Hanoi (NHTD)	env	2017-11-26	Illumina HiSeq X10 machine	617	CR	2442200	151	79.9746	88	319.254
NHE247	Roberts et al., 2022	QIACube and QIAamp 96 DNA QIACube HT kit (Qiagen)	National Hospital for Tropical Diseases, Hanoi (NHTD)	env	2017-11-26	Illumina HiSeq X10 machine	648	ESBL	2796478	151	91.5762	2	7.26
NHE248	Roberts et al., 2022	QIACube and QIAamp 96 DNA QIACube HT kit (Qiagen)	National Hospital for Tropical Diseases, Hanoi (NHTD)	env	2017-11-26	Illumina HiSeq X10 machine	167	CR	2549714	151	83.4954	18	211.93
NHE254	Roberts et al., 2022	QIACube and QIAamp 96 DNA QIACube HT kit (Qiagen)	National Hospital for Tropical Diseases, Hanoi (NHTD)	env	2017-11-26	Illumina HiSeq X10 machine	224	CR	2269538	151	74.3205	9	49.495
NHE256	Roberts et al., 2022	QIACube and QIAamp 96 DNA QIACube HT kit (Qiagen)	National Hospital for Tropical Diseases, Hanoi (NHTD)	env	2017-11-26	Illumina HiSeq X10 machine	167	ESBL	2288784	151	74.9507	2	24.994
NHE260	Roberts et al., 2022	QIACube and QIAamp 96 DNA QIACube HT kit (Qiagen)	National Hospital for Tropical Diseases, Hanoi (NHTD)	env	2017-11-26	Illumina HiSeq X10 machine	617	CR	2435560	151	79.7572	85	315.899
NHE261	Roberts et al., 2022	QIACube and QIAamp 96 DNA QIACube HT kit (Qiagen)	National Hospital for Tropical Diseases, Hanoi (NHTD)	env	2017-11-26	Illumina HiSeq X10 machine	617	CR	2266526	151	74.2218	80	316.274
NHE270	Roberts et al., 2022	QIACube and QIAamp 96 DNA QIACube HT kit (Qiagen)	National Hospital for Tropical Diseases, Hanoi (NHTD)	env	2017-12-28	Illumina HiSeq X10 machine	448	ESBL	2250146	151	73.6854	31	940.74
NHE283	Roberts et al., 2022	QIACube and QIAamp 96 DNA QIACube HT kit (Qiagen)	National Hospital for Tropical Diseases, Hanoi (NHTD)	env	2017-12-28	Illumina HiSeq X10 machine	410	ESBL	2396986	151	78.494	17	84.523
NHP176	Roberts et al., 2022	QIACube and QIAamp 96 DNA QIACube HT kit (Qiagen)	National Hospital for Tropical Diseases, Hanoi (NHTD)	clinical	2017-07-05	Illumina HiSeq X10 machine	410	CR	4023472	151	131.756	98	2116.6
NHP213	Roberts et al., 2022	QIACube and QIAamp 96 DNA QIACube HT kit (Qiagen)	National Hospital for Tropical Diseases, Hanoi (NHTD)	clinical	2017-07-11	Illumina HiSeq X10 machine	648	ESBL	3465518	151	113.485	24	161.054
NHP215	Roberts et al., 2022	QIACube and QIAamp 96 DNA QIACube HT kit (Qiagen)	National Hospital for Tropical Diseases, Hanoi (NHTD)	clinical	2017-07-11	Illumina HiSeq X10 machine	410	ESBL	4032804	151	132.062	6	90.885
NHP019	Roberts et al., 2022	QIACube and QIAamp 96 DNA QIACube HT kit (Qiagen)	National Hospital for Tropical Diseases, Hanoi (NHTD)	clinical	2017-06-27	Illumina HiSeq X10 machine	1193	ESBL	4460498	151	146.068	15	24.708
NHP225	Roberts et al., 2022	QIACube and QIAamp 96 DNA QIACube HT kit (Qiagen)	National Hospital for Tropical Diseases, Hanoi (NHTD)	clinical	2017-07-11	Illumina HiSeq X10 machine	167	ESBL	3841890	151	125.81	14	129.132
NHP341	Roberts et al., 2022	QIACube and QIAamp 96 DNA QIACube HT kit (Qiagen)	National Hospital for Tropical Diseases, Hanoi (NHTD)	clinical	2017-07-18	Illumina HiSeq X10 machine	1193	ESBL	3255658	151	106.613	16	176.44
NHP029	Roberts et al., 2022	QIACube and QIAamp 96 DNA QIACube HT kit (Qiagen)	National Hospital for Tropical Diseases, Hanoi (NHTD)	clinical	2017-06-27	Illumina HiSeq X10 machine	410	ESBL	3957480	151	129.595	35	190.273
NHP032	Roberts et al., 2022	QIACube and QIAamp 96 DNA QIACube HT kit (Qiagen)	National Hospital for Tropical Diseases, Hanoi (NHTD)	clinical	2017-06-27	Illumina HiSeq X10 machine	410	ESBL	4271680	151	139.885	37	194.353
NHP101	Roberts et al., 2022	QIACube and QIAamp 96 DNA QIACube HT kit (Qiagen)	National Hospital for Tropical Diseases, Hanoi (NHTD)	clinical	2017-07-04	Illumina HiSeq X10 machine	1193	ESBL	3928026	151	128.631	16	152.423
NHP045	Roberts et al., 2022	QIACube and QIAamp 96 DNA QIACube HT kit (Qiagen)	National Hospital for Tropical Diseases, Hanoi (NHTD)	clinical	2017-06-27	Illumina HiSeq X10 machine	354	CR	4328864	151	141.757	8	198.802
NHP103	Roberts et al., 2022	QIACube and QIAamp 96 DNA QIACube HT kit (Qiagen)	National Hospital for Tropical Diseases, Hanoi (NHTD)	clinical	2017-07-04	Illumina HiSeq X10 machine	48	ESBL	3467008	151	113.534	11	157.546
NHP228	Roberts et al., 2022	QIACube and QIAamp 96 DNA QIACube HT kit (Qiagen)	National Hospital for Tropical Diseases, Hanoi (NHTD)	clinical	2017-07-11	Illumina HiSeq X10 machine	405	ESBL	1566940	151	51.3125	5	144.947
NHP294	Roberts et al., 2022	QIACube and QIAamp 96 DNA QIACube HT kit (Qiagen)	National Hospital for Tropical Diseases, Hanoi (NHTD)	clinical	2017-07-12	Illumina HiSeq X10 machine	354	ESBL	3292944	151	107.834	29	539.391
NHP105	Roberts et al., 2022	QIACube and QIAamp 96 DNA QIACube HT kit (Qiagen)	National Hospital for Tropical Diseases, Hanoi (NHTD)	clinical	2017-07-04	Illumina HiSeq X10 machine	167	ESBL	3333234	151	109.153	16	93.461
NHP052	Roberts et al., 2022	QIACube and QIAamp 96 DNA QIACube HT kit (Qiagen)	National Hospital for Tropical Diseases, Hanoi (NHTD)	clinical	2017-06-27	Illumina HiSeq X10 machine	167	ESBL	3918688	151	128.325	67	361.624
NHP056	Roberts et al., 2022	QIACube and QIAamp 96 DNA QIACube HT kit (Qiagen)	National Hospital for Tropical Diseases, Hanoi (NHTD)	clinical	2017-06-27	Illumina HiSeq X10 machine	167	CR	4347808	151	142.378	60	321.986
NHP237	Roberts et al., 2022	QIACube and QIAamp 96 DNA QIACube HT kit (Qiagen)	National Hospital for Tropical Diseases, Hanoi (NHTD)	clinical	2017-07-11	Illumina HiSeq X10 machine	167	ESBL	3622536	151	118.627	32	332.79
NHP240	Roberts et al., 2022	QIACube and QIAamp 96 DNA QIACube HT kit (Qiagen)	National Hospital for Tropical Diseases, Hanoi (NHTD)	clinical	2017-07-11	Illumina HiSeq X10 machine	167	CR	3552236	151	116.325	30	183.494
NHP062	Roberts et al., 2022	QIACube and QIAamp 96 DNA QIACube HT kit (Qiagen)	National Hospital for Tropical Diseases, Hanoi (NHTD)	clinical	2017-06-27	Illumina HiSeq X10 machine	457	ESBL	5090662	151	166.704	17	244.197
NHP342	Roberts et al., 2022	QIACube and QIAamp 96 DNA QIACube HT kit (Qiagen)	National Hospital for Tropical Diseases, Hanoi (NHTD)	clinical	2017-07-18	Illumina HiSeq X10 machine	457	ESBL	3505978	151	114.81	23	165.052
NHP074	Roberts et al., 2022	QIACube and QIAamp 96 DNA QIACube HT kit (Qiagen)	National Hospital for Tropical Diseases, Hanoi (NHTD)	clinical	2017-06-27	Illumina HiSeq X10 machine	648	ESBL	4174380	151	136.698	25	243.889
NHP077	Roberts et al., 2022	QIACube and QIAamp 96 DNA QIACube HT kit (Qiagen)	National Hospital for Tropical Diseases, Hanoi (NHTD)	clinical	2017-06-27	Illumina HiSeq X10 machine	648	CR	3895584	151	127.569	24	199.687
NHP122	Roberts et al., 2022	QIACube and QIAamp 96 DNA QIACube HT kit (Qiagen)	National Hospital for Tropical Diseases, Hanoi (NHTD)	clinical	2017-07-04	Illumina HiSeq X10 machine	648	ESBL	4338834	151	142.084	32	317.394
NHP078	Roberts et al., 2022	QIACube and QIAamp 96 DNA QIACube HT kit (Qiagen)	National Hospital for Tropical Diseases, Hanoi (NHTD)	clinical	2017-06-28	Illumina HiSeq X10 machine	3032	ESBL	3943440	151	129.136	13	437.214
NHP081	Roberts et al., 2022	QIACube and QIAamp 96 DNA QIACube HT kit (Qiagen)	National Hospital for Tropical Diseases, Hanoi (NHTD)	clinical	2017-06-29	Illumina HiSeq X10 machine	410	ESBL	4366182	151	142.979	23	124.204
NHP134	Roberts et al., 2022	QIACube and QIAamp 96 DNA QIACube HT kit (Qiagen)	National Hospital for Tropical Diseases, Hanoi (NHTD)	clinical	2017-07-04	Illumina HiSeq X10 machine	410	ESBL	4247050	151	139.078	37	691.241
NHP137	Roberts et al., 2022	QIACube and QIAamp 96 DNA QIACube HT kit (Qiagen)	National Hospital for Tropical Diseases, Hanoi (NHTD)	clinical	2017-07-04	Illumina HiSeq X10 machine	410	ESBL	4587248	151	150.218	47	766.284
NHP144	Roberts et al., 2022	QIACube and QIAamp 96 DNA QIACube HT kit (Qiagen)	National Hospital for Tropical Diseases, Hanoi (NHTD)	clinical	2017-07-04	Illumina HiSeq X10 machine	410	ESBL	3635082	151	119.038	26	425.235
NHP256	Roberts et al., 2022	QIACube and QIAamp 96 DNA QIACube HT kit (Qiagen)	National Hospital for Tropical Diseases, Hanoi (NHTD)	clinical	2017-07-11	Illumina HiSeq X10 machine	1193	ESBL	4591748	151	150.366	26	226.519
NHP346	Roberts et al., 2022	QIACube and QIAamp 96 DNA QIACube HT kit (Qiagen)	National Hospital for Tropical Diseases, Hanoi (NHTD)	clinical	2017-07-18	Illumina HiSeq X10 machine	410	ESBL	3507372	151	114.856	10	72.293
NHP348	Roberts et al., 2022	QIACube and QIAamp 96 DNA QIACube HT kit (Qiagen)	National Hospital for Tropical Diseases, Hanoi (NHTD)	clinical	2017-07-18	Illumina HiSeq X10 machine	410	ESBL	3615902	151	118.41	32	1178.82
NHP089	Roberts et al., 2022	QIACube and QIAamp 96 DNA QIACube HT kit (Qiagen)	National Hospital for Tropical Diseases, Hanoi (NHTD)	clinical	2017-06-30	Illumina HiSeq X10 machine	131	ESBL	3929614	151	128.683	15	106.654
NHP155	Roberts et al., 2022	QIACube and QIAamp 96 DNA QIACube HT kit (Qiagen)	National Hospital for Tropical Diseases, Hanoi (NHTD)	clinical	2017-07-04	Illumina HiSeq X10 machine	131	ESBL	4138208	151	135.514	15	92.194
NHP156	Roberts et al., 2022	QIACube and QIAamp 96 DNA QIACube HT kit (Qiagen)	National Hospital for Tropical Diseases, Hanoi (NHTD)	clinical	2017-07-04	Illumina HiSeq X10 machine	1193	CR	4327548	151	141.714	29	202.676
NHP264	Roberts et al., 2022	QIACube and QIAamp 96 DNA QIACube HT kit (Qiagen)	National Hospital for Tropical Diseases, Hanoi (NHTD)	clinical	2017-07-11	Illumina HiSeq X10 machine	131	ESBL	3375816	151	110.548	50	1615.39
NHP355	Roberts et al., 2022	QIACube and QIAamp 96 DNA QIACube HT kit (Qiagen)	National Hospital for Tropical Diseases, Hanoi (NHTD)	clinical	2017-07-18	Illumina HiSeq X10 machine	131	ESBL	2061716	151	67.5149	3	11.356
NHP092	Roberts et al., 2022	QIACube and QIAamp 96 DNA QIACube HT kit (Qiagen)	National Hospital for Tropical Diseases, Hanoi (NHTD)	clinical	2017-06-30	Illumina HiSeq X10 machine	38	CR	3921174	151	128.407	0	0
NHP163	Roberts et al., 2022	QIACube and QIAamp 96 DNA QIACube HT kit (Qiagen)	National Hospital for Tropical Diseases, Hanoi (NHTD)	clinical	2017-07-04	Illumina HiSeq X10 machine	167	ESBL	4139258	151	135.548	17	71.4
NHP297	Roberts et al., 2022	QIACube and QIAamp 96 DNA QIACube HT kit (Qiagen)	National Hospital for Tropical Diseases, Hanoi (NHTD)	clinical	2017-07-12	Illumina HiSeq X10 machine	167	ESBL	3361456	151	110.077	2	6.392
NHP299	Roberts et al., 2022	QIACube and QIAamp 96 DNA QIACube HT kit (Qiagen)	National Hospital for Tropical Diseases, Hanoi (NHTD)	clinical	2017-07-12	Illumina HiSeq X10 machine	1193	ESBL	3519448	151	115.251	24	183.091
NHP359	Roberts et al., 2022	QIACube and QIAamp 96 DNA QIACube HT kit (Qiagen)	National Hospital for Tropical Diseases, Hanoi (NHTD)	clinical	2017-07-18	Illumina HiSeq X10 machine	1193	ESBL	3902614	151	127.799	29	701.169
NHP360	Roberts et al., 2022	QIACube and QIAamp 96 DNA QIACube HT kit (Qiagen)	National Hospital for Tropical Diseases, Hanoi (NHTD)	clinical	2017-07-18	Illumina HiSeq X10 machine	2003	ESBL	4880448	151	159.82	49	544.04
NHP428	Roberts et al., 2022	QIACube and QIAamp 96 DNA QIACube HT kit (Qiagen)	National Hospital for Tropical Diseases, Hanoi (NHTD)	clinical	2017-07-21	Illumina HiSeq X10 machine	1193	ESBL	4087966	151	133.868	24	515.415
NHP431	Roberts et al., 2022	QIACube and QIAamp 96 DNA QIACube HT kit (Qiagen)	National Hospital for Tropical Diseases, Hanoi (NHTD)	clinical	2017-07-21	Illumina HiSeq X10 machine	101	ESBL	3936326	151	128.903	29	298.632
NHP094	Roberts et al., 2022	QIACube and QIAamp 96 DNA QIACube HT kit (Qiagen)	National Hospital for Tropical Diseases, Hanoi (NHTD)	clinical	2017-07-03	Illumina HiSeq X10 machine	10	ESBL	3887756	151	127.312	14	47.063
NHP096	Roberts et al., 2022	QIACube and QIAamp 96 DNA QIACube HT kit (Qiagen)	National Hospital for Tropical Diseases, Hanoi (NHTD)	clinical	2017-07-03	Illumina HiSeq X10 machine	457	ESBL	3736830	151	122.37	15	298.754
NHP166	Roberts et al., 2022	QIACube and QIAamp 96 DNA QIACube HT kit (Qiagen)	National Hospital for Tropical Diseases, Hanoi (NHTD)	clinical	2017-07-04	Illumina HiSeq X10 machine	10	ESBL	4011496	151	131.364	25	454.683
NHP167	Roberts et al., 2022	QIACube and QIAamp 96 DNA QIACube HT kit (Qiagen)	National Hospital for Tropical Diseases, Hanoi (NHTD)	clinical	2017-07-04	Illumina HiSeq X10 machine	457	CR	3769882	151	123.452	11	260.175
NHP365	Roberts et al., 2022	QIACube and QIAamp 96 DNA QIACube HT kit (Qiagen)	National Hospital for Tropical Diseases, Hanoi (NHTD)	clinical	2017-07-18	Illumina HiSeq X10 machine	354	ESBL	4513012	151	147.787	73	689.373
NHP505	Roberts et al., 2022	QIACube and QIAamp 96 DNA QIACube HT kit (Qiagen)	National Hospital for Tropical Diseases, Hanoi (NHTD)	clinical	2017-07-26	Illumina HiSeq X10 machine	354	ESBL	5001488	151	163.784	39	436.367
NHP540	Roberts et al., 2022	QIACube and QIAamp 96 DNA QIACube HT kit (Qiagen)	National Hospital for Tropical Diseases, Hanoi (NHTD)	clinical	2017-08-01	Illumina HiSeq X10 machine	773	ESBL	4448164	151	145.664	25	128.284
NHP545	Roberts et al., 2022	QIACube and QIAamp 96 DNA QIACube HT kit (Qiagen)	National Hospital for Tropical Diseases, Hanoi (NHTD)	clinical	2017-08-01	Illumina HiSeq X10 machine	354	ESBL	2265794	151	74.1979	59	667.476
NHP271	Roberts et al., 2022	QIACube and QIAamp 96 DNA QIACube HT kit (Qiagen)	National Hospital for Tropical Diseases, Hanoi (NHTD)	clinical	2017-07-11	Illumina HiSeq X10 machine	206	ESBL	3502448	151	114.695	29	292.16
NHP272	Roberts et al., 2022	QIACube and QIAamp 96 DNA QIACube HT kit (Qiagen)	National Hospital for Tropical Diseases, Hanoi (NHTD)	clinical	2017-07-11	Illumina HiSeq X10 machine	648	ESBL	3175176	151	103.977	19	137.084
NHP195	Roberts et al., 2022	QIACube and QIAamp 96 DNA QIACube HT kit (Qiagen)	National Hospital for Tropical Diseases, Hanoi (NHTD)	clinical	2017-07-07	Illumina HiSeq X10 machine	1193	ESBL	3678736	151	120.467	111	5518.31
NHP370	Roberts et al., 2022	QIACube and QIAamp 96 DNA QIACube HT kit (Qiagen)	National Hospital for Tropical Diseases, Hanoi (NHTD)	clinical	2017-07-18	Illumina HiSeq X10 machine	1193	CR	3783462	151	123.897	21	598.983
NHP457	Roberts et al., 2022	QIACube and QIAamp 96 DNA QIACube HT kit (Qiagen)	National Hospital for Tropical Diseases, Hanoi (NHTD)	clinical	2017-07-25	Illumina HiSeq X10 machine	1193	ESBL	4128046	151	135.181	18	195.929
NHP201	Roberts et al., 2022	QIACube and QIAamp 96 DNA QIACube HT kit (Qiagen)	National Hospital for Tropical Diseases, Hanoi (NHTD)	clinical	2017-07-08	Illumina HiSeq X10 machine	2614	CR	3779194	151	123.757	9	121.556
NHP277	Roberts et al., 2022	QIACube and QIAamp 96 DNA QIACube HT kit (Qiagen)	National Hospital for Tropical Diseases, Hanoi (NHTD)	clinical	2017-07-11	Illumina HiSeq X10 machine	1193	ESBL	4651464	151	152.321	3	11.92
NHP206	Roberts et al., 2022	QIACube and QIAamp 96 DNA QIACube HT kit (Qiagen)	National Hospital for Tropical Diseases, Hanoi (NHTD)	clinical	2017-07-08	Illumina HiSeq X10 machine	448	ESBL	3958078	151	129.615	50	340.286
NHP285	Roberts et al., 2022	QIACube and QIAamp 96 DNA QIACube HT kit (Qiagen)	National Hospital for Tropical Diseases, Hanoi (NHTD)	clinical	2017-07-11	Illumina HiSeq X10 machine	448	ESBL	3564310	151	116.72	36	639.902
NHP373	Roberts et al., 2022	QIACube and QIAamp 96 DNA QIACube HT kit (Qiagen)	National Hospital for Tropical Diseases, Hanoi (NHTD)	clinical	2017-07-18	Illumina HiSeq X10 machine	448	ESBL	3519294	151	115.246	22	507.873
NHP375	Roberts et al., 2022	QIACube and QIAamp 96 DNA QIACube HT kit (Qiagen)	National Hospital for Tropical Diseases, Hanoi (NHTD)	clinical	2017-07-18	Illumina HiSeq X10 machine	648	ESBL	3438358	151	112.596	13	131.258
NHP377	Roberts et al., 2022	QIACube and QIAamp 96 DNA QIACube HT kit (Qiagen)	National Hospital for Tropical Diseases, Hanoi (NHTD)	clinical	2017-07-18	Illumina HiSeq X10 machine	648	CR	3565428	151	116.757	12	118.121
NHP288	Roberts et al., 2022	QIACube and QIAamp 96 DNA QIACube HT kit (Qiagen)	National Hospital for Tropical Diseases, Hanoi (NHTD)	clinical	2017-07-11	Illumina HiSeq X10 machine	1193	ESBL	3518304	151	115.214	18	305.765
NHP319	Roberts et al., 2022	QIACube and QIAamp 96 DNA QIACube HT kit (Qiagen)	National Hospital for Tropical Diseases, Hanoi (NHTD)	clinical	2017-07-14	Illumina HiSeq X10 machine	648	ESBL	3641592	151	119.251	46	186.395
NHP389	Roberts et al., 2022	QIACube and QIAamp 96 DNA QIACube HT kit (Qiagen)	National Hospital for Tropical Diseases, Hanoi (NHTD)	clinical	2017-07-18	Illumina HiSeq X10 machine	648	ESBL	3365992	151	110.226	41	763.037
NHP464	Roberts et al., 2022	QIACube and QIAamp 96 DNA QIACube HT kit (Qiagen)	National Hospital for Tropical Diseases, Hanoi (NHTD)	clinical	2017-07-25	Illumina HiSeq X10 machine	648	ESBL	4297548	151	140.732	16	161.756
NHP393	Roberts et al., 2022	QIACube and QIAamp 96 DNA QIACube HT kit (Qiagen)	National Hospital for Tropical Diseases, Hanoi (NHTD)	clinical	2017-07-18	Illumina HiSeq X10 machine	93	ESBL	3667378	151	120.095	36	658.079
NHP471	Roberts et al., 2022	QIACube and QIAamp 96 DNA QIACube HT kit (Qiagen)	National Hospital for Tropical Diseases, Hanoi (NHTD)	clinical	2017-07-25	Illumina HiSeq X10 machine	93	CR	4217258	151	138.102	13	88.726
NHP721	Roberts et al., 2022	QIACube and QIAamp 96 DNA QIACube HT kit (Qiagen)	National Hospital for Tropical Diseases, Hanoi (NHTD)	clinical	2017-08-08	Illumina HiSeq X10 machine	2003	ESBL	4446172	151	145.599	31	168.111
NHP399	Roberts et al., 2022	QIACube and QIAamp 96 DNA QIACube HT kit (Qiagen)	National Hospital for Tropical Diseases, Hanoi (NHTD)	clinical	2017-07-18	Illumina HiSeq X10 machine	617	ESBL	3676380	151	120.39	56	715.329
NHP323	Roberts et al., 2022	QIACube and QIAamp 96 DNA QIACube HT kit (Qiagen)	National Hospital for Tropical Diseases, Hanoi (NHTD)	clinical	2017-07-15	Illumina HiSeq X10 machine	1011	ESBL	3017300	151	98.8074	11	229.331
NHP324	Roberts et al., 2022	QIACube and QIAamp 96 DNA QIACube HT kit (Qiagen)	National Hospital for Tropical Diseases, Hanoi (NHTD)	clinical	2017-07-16	Illumina HiSeq X10 machine	648	ESBL	4023256	151	131.749	26	53.829
NHP402	Roberts et al., 2022	QIACube and QIAamp 96 DNA QIACube HT kit (Qiagen)	National Hospital for Tropical Diseases, Hanoi (NHTD)	clinical	2017-07-18	Illumina HiSeq X10 machine	1380	CR	3788280	151	124.055	4	11.653
NHP404	Roberts et al., 2022	QIACube and QIAamp 96 DNA QIACube HT kit (Qiagen)	National Hospital for Tropical Diseases, Hanoi (NHTD)	clinical	2017-07-18	Illumina HiSeq X10 machine	1193	ESBL	3610794	151	118.243	80	2801.35
NHP551	Roberts et al., 2022	QIACube and QIAamp 96 DNA QIACube HT kit (Qiagen)	National Hospital for Tropical Diseases, Hanoi (NHTD)	clinical	2017-08-01	Illumina HiSeq X10 machine	648	ESBL	2452896	151	80.3249	36	211.476
NHP552	Roberts et al., 2022	QIACube and QIAamp 96 DNA QIACube HT kit (Qiagen)	National Hospital for Tropical Diseases, Hanoi (NHTD)	clinical	2017-08-01	Illumina HiSeq X10 machine	648	CR	2207002	151	72.2726	51	492.214
NHP724	Roberts et al., 2022	QIACube and QIAamp 96 DNA QIACube HT kit (Qiagen)	National Hospital for Tropical Diseases, Hanoi (NHTD)	clinical	2017-08-08	Illumina HiSeq X10 machine	648	ESBL	4161958	151	136.291	61	543.896
NHP802	Roberts et al., 2022	QIACube and QIAamp 96 DNA QIACube HT kit (Qiagen)	National Hospital for Tropical Diseases, Hanoi (NHTD)	clinical	2017-08-15	Illumina HiSeq X10 machine	648	ESBL	3740810	151	122.5	32	220.59
NHP870	Roberts et al., 2022	QIACube and QIAamp 96 DNA QIACube HT kit (Qiagen)	National Hospital for Tropical Diseases, Hanoi (NHTD)	clinical	2017-08-22	Illumina HiSeq X10 machine	648	ESBL	4441094	151	145.432	14	27.923
NHP326	Roberts et al., 2022	QIACube and QIAamp 96 DNA QIACube HT kit (Qiagen)	National Hospital for Tropical Diseases, Hanoi (NHTD)	clinical	2017-07-16	Illumina HiSeq X10 machine	3076	ESBL	3625128	151	118.712	2	114.564
NHP1163	Roberts et al., 2022	QIACube and QIAamp 96 DNA QIACube HT kit (Qiagen)	National Hospital for Tropical Diseases, Hanoi (NHTD)	clinical	2017-09-12	Illumina HiSeq X10 machine	354	ESBL	4666916	151	152.827	65	255.416
NHP405	Roberts et al., 2022	QIACube and QIAamp 96 DNA QIACube HT kit (Qiagen)	National Hospital for Tropical Diseases, Hanoi (NHTD)	clinical	2017-07-18	Illumina HiSeq X10 machine	3076	CR	3200872	151	104.819	23	1395.47
NHP479	Roberts et al., 2022	QIACube and QIAamp 96 DNA QIACube HT kit (Qiagen)	National Hospital for Tropical Diseases, Hanoi (NHTD)	clinical	2017-07-25	Illumina HiSeq X10 machine	354	ESBL	4326560	151	141.682	41	132.52
NHP481	Roberts et al., 2022	QIACube and QIAamp 96 DNA QIACube HT kit (Qiagen)	National Hospital for Tropical Diseases, Hanoi (NHTD)	clinical	2017-07-25	Illumina HiSeq X10 machine	354	ESBL	4122080	151	134.986	52	247.466
NHP805	Roberts et al., 2022	QIACube and QIAamp 96 DNA QIACube HT kit (Qiagen)	National Hospital for Tropical Diseases, Hanoi (NHTD)	clinical	2017-08-15	Illumina HiSeq X10 machine	354	ESBL	3957018	151	129.58	47	299.512
NHP808	Roberts et al., 2022	QIACube and QIAamp 96 DNA QIACube HT kit (Qiagen)	National Hospital for Tropical Diseases, Hanoi (NHTD)	clinical	2017-08-15	Illumina HiSeq X10 machine	354	CR	3552160	151	116.322	50	299.814
NHP875	Roberts et al., 2022	QIACube and QIAamp 96 DNA QIACube HT kit (Qiagen)	National Hospital for Tropical Diseases, Hanoi (NHTD)	clinical	2017-08-22	Illumina HiSeq X10 machine	354	ESBL	4313856	151	141.266	75	932.91
NHP877	Roberts et al., 2022	QIACube and QIAamp 96 DNA QIACube HT kit (Qiagen)	National Hospital for Tropical Diseases, Hanoi (NHTD)	clinical	2017-08-22	Illumina HiSeq X10 machine	354	CR	5315816	151	174.077	97	1340.56
NHP1073	Roberts et al., 2022	QIACube and QIAamp 96 DNA QIACube HT kit (Qiagen)	National Hospital for Tropical Diseases, Hanoi (NHTD)	clinical	2017-09-06	Illumina HiSeq X10 machine	354	ESBL	4549102	151	148.969	51	251.443
NHP334	Roberts et al., 2022	QIACube and QIAamp 96 DNA QIACube HT kit (Qiagen)	National Hospital for Tropical Diseases, Hanoi (NHTD)	clinical	2017-07-17	Illumina HiSeq X10 machine	167	CR	4140888	151	135.602	12	286.566
NHP409	Roberts et al., 2022	QIACube and QIAamp 96 DNA QIACube HT kit (Qiagen)	National Hospital for Tropical Diseases, Hanoi (NHTD)	clinical	2017-07-18	Illumina HiSeq X10 machine	405	ESBL	3713224	151	121.597	34	303.974
NHP413	Roberts et al., 2022	QIACube and QIAamp 96 DNA QIACube HT kit (Qiagen)	National Hospital for Tropical Diseases, Hanoi (NHTD)	clinical	2017-07-18	Illumina HiSeq X10 machine	167	ESBL	3339256	151	109.35	10	287.706
NHP419	Roberts et al., 2022	QIACube and QIAamp 96 DNA QIACube HT kit (Qiagen)	National Hospital for Tropical Diseases, Hanoi (NHTD)	clinical	2017-07-18	Illumina HiSeq X10 machine	69	ESBL	3846318	151	125.955	43	2006.69
NHP423	Roberts et al., 2022	QIACube and QIAamp 96 DNA QIACube HT kit (Qiagen)	National Hospital for Tropical Diseases, Hanoi (NHTD)	clinical	2017-07-19	Illumina HiSeq X10 machine	131	CR	2248256	151	73.6236	79	316.111
NHP511	Roberts et al., 2022	QIACube and QIAamp 96 DNA QIACube HT kit (Qiagen)	National Hospital for Tropical Diseases, Hanoi (NHTD)	clinical	2017-07-26	Illumina HiSeq X10 machine	NEW	ESBL	4694246	151	153.722	26	85.573
NHP575	Roberts et al., 2022	QIACube and QIAamp 96 DNA QIACube HT kit (Qiagen)	National Hospital for Tropical Diseases, Hanoi (NHTD)	clinical	2017-08-01	Illumina HiSeq X10 machine	69	CR	4484402	151	146.851	14	161.197
NHP567	Roberts et al., 2022	QIACube and QIAamp 96 DNA QIACube HT kit (Qiagen)	National Hospital for Tropical Diseases, Hanoi (NHTD)	clinical	2017-08-01	Illumina HiSeq X10 machine	69	ESBL	4424574	151	144.891	26	540.07
NHP734	Roberts et al., 2022	QIACube and QIAamp 96 DNA QIACube HT kit (Qiagen)	National Hospital for Tropical Diseases, Hanoi (NHTD)	clinical	2017-08-08	Illumina HiSeq X10 machine	69	ESBL	3690880	151	120.865	48	773.57
NHP814	Roberts et al., 2022	QIACube and QIAamp 96 DNA QIACube HT kit (Qiagen)	National Hospital for Tropical Diseases, Hanoi (NHTD)	clinical	2017-08-15	Illumina HiSeq X10 machine	NEW	CR	3526934	151	115.496	30	168.785
NHP812	Roberts et al., 2022	QIACube and QIAamp 96 DNA QIACube HT kit (Qiagen)	National Hospital for Tropical Diseases, Hanoi (NHTD)	clinical	2017-08-15	Illumina HiSeq X10 machine	NEW	ESBL	3800512	151	124.455	19	53.483
NHP424	Roberts et al., 2022	QIACube and QIAamp 96 DNA QIACube HT kit (Qiagen)	National Hospital for Tropical Diseases, Hanoi (NHTD)	clinical	2017-07-19	Illumina HiSeq X10 machine	1193	CR	3623442	151	118.657	23	183.207
NHP516	Roberts et al., 2022	QIACube and QIAamp 96 DNA QIACube HT kit (Qiagen)	National Hospital for Tropical Diseases, Hanoi (NHTD)	clinical	2017-07-26	Illumina HiSeq X10 machine	410	CR	4620590	151	151.31	28	807.81
NHP519	Roberts et al., 2022	QIACube and QIAamp 96 DNA QIACube HT kit (Qiagen)	National Hospital for Tropical Diseases, Hanoi (NHTD)	clinical	2017-07-26	Illumina HiSeq X10 machine	410	ESBL	5015528	151	164.243	20	457.599
NHP583	Roberts et al., 2022	QIACube and QIAamp 96 DNA QIACube HT kit (Qiagen)	National Hospital for Tropical Diseases, Hanoi (NHTD)	clinical	2017-08-01	Illumina HiSeq X10 machine	354	CR	4888332	151	160.078	32	455.903
NHP880	Roberts et al., 2022	QIACube and QIAamp 96 DNA QIACube HT kit (Qiagen)	National Hospital for Tropical Diseases, Hanoi (NHTD)	clinical	2017-08-22	Illumina HiSeq X10 machine	410	ESBL	4274472	151	139.976	37	952.542
NHP884	Roberts et al., 2022	QIACube and QIAamp 96 DNA QIACube HT kit (Qiagen)	National Hospital for Tropical Diseases, Hanoi (NHTD)	clinical	2017-08-22	Illumina HiSeq X10 machine	648	CR	4217640	151	138.115	54	1781.75
NHP958	Roberts et al., 2022	QIACube and QIAamp 96 DNA QIACube HT kit (Qiagen)	National Hospital for Tropical Diseases, Hanoi (NHTD)	clinical	2017-08-29	Illumina HiSeq X10 machine	648	CR	4944390	151	161.914	26	1254.45
NHP435	Roberts et al., 2022	QIACube and QIAamp 96 DNA QIACube HT kit (Qiagen)	National Hospital for Tropical Diseases, Hanoi (NHTD)	clinical	2017-07-21	Illumina HiSeq X10 machine	1193	ESBL	3925532	151	128.549	32	165.289
NHP436	Roberts et al., 2022	QIACube and QIAamp 96 DNA QIACube HT kit (Qiagen)	National Hospital for Tropical Diseases, Hanoi (NHTD)	clinical	2017-07-21	Illumina HiSeq X10 machine	1193	ESBL	4492488	151	147.115	25	171.879
NHP437	Roberts et al., 2022	QIACube and QIAamp 96 DNA QIACube HT kit (Qiagen)	National Hospital for Tropical Diseases, Hanoi (NHTD)	clinical	2017-07-21	Illumina HiSeq X10 machine	1193	ESBL	3729464	151	122.129	25	171.878
NHP1234	Roberts et al., 2022	QIACube and QIAamp 96 DNA QIACube HT kit (Qiagen)	National Hospital for Tropical Diseases, Hanoi (NHTD)	clinical	2017-09-19	Illumina HiSeq X10 machine	131	ESBL	1559454	151	51.0674	20	94.166
NHP1236	Roberts et al., 2022	QIACube and QIAamp 96 DNA QIACube HT kit (Qiagen)	National Hospital for Tropical Diseases, Hanoi (NHTD)	clinical	2017-09-19	Illumina HiSeq X10 machine	131	CR	1798844	151	58.9067	27	185.59
NHP491	Roberts et al., 2022	QIACube and QIAamp 96 DNA QIACube HT kit (Qiagen)	National Hospital for Tropical Diseases, Hanoi (NHTD)	clinical	2017-07-25	Illumina HiSeq X10 machine	1193	ESBL	3767968	151	123.39	18	67.084
NHP586	Roberts et al., 2022	QIACube and QIAamp 96 DNA QIACube HT kit (Qiagen)	National Hospital for Tropical Diseases, Hanoi (NHTD)	clinical	2017-08-01	Illumina HiSeq X10 machine	101	ESBL	4000174	151	130.994	46	816.756
NHP1020	Roberts et al., 2022	QIACube and QIAamp 96 DNA QIACube HT kit (Qiagen)	National Hospital for Tropical Diseases, Hanoi (NHTD)	clinical	2017-09-05	Illumina HiSeq X10 machine	131	ESBL	4387840	151	143.688	42	307.9
NHP1023	Roberts et al., 2022	QIACube and QIAamp 96 DNA QIACube HT kit (Qiagen)	National Hospital for Tropical Diseases, Hanoi (NHTD)	clinical	2017-09-05	Illumina HiSeq X10 machine	131	ESBL	4245042	151	139.012	32	227.563
NHP1166	Roberts et al., 2022	QIACube and QIAamp 96 DNA QIACube HT kit (Qiagen)	National Hospital for Tropical Diseases, Hanoi (NHTD)	clinical	2017-09-12	Illumina HiSeq X10 machine	131	ESBL	4387110	151	143.665	26	53.221
NHP1169	Roberts et al., 2022	QIACube and QIAamp 96 DNA QIACube HT kit (Qiagen)	National Hospital for Tropical Diseases, Hanoi (NHTD)	clinical	2017-09-12	Illumina HiSeq X10 machine	131	ESBL	3939454	151	129.005	43	320.42
NHP1165	Roberts et al., 2022	QIACube and QIAamp 96 DNA QIACube HT kit (Qiagen)	National Hospital for Tropical Diseases, Hanoi (NHTD)	clinical	2017-09-12	Illumina HiSeq X10 machine	354	ESBL	2114056	151	69.2289	1	7.648
NHP589	Roberts et al., 2022	QIACube and QIAamp 96 DNA QIACube HT kit (Qiagen)	National Hospital for Tropical Diseases, Hanoi (NHTD)	clinical	2017-08-01	Illumina HiSeq X10 machine	3171	CR	4505846	151	147.553	11	57.438
NHP496	Roberts et al., 2022	QIACube and QIAamp 96 DNA QIACube HT kit (Qiagen)	National Hospital for Tropical Diseases, Hanoi (NHTD)	clinical	2017-07-25	Illumina HiSeq X10 machine	1722	ESBL	4173006	151	136.653	13	351.707
NHP747	Roberts et al., 2022	QIACube and QIAamp 96 DNA QIACube HT kit (Qiagen)	National Hospital for Tropical Diseases, Hanoi (NHTD)	clinical	2017-08-08	Illumina HiSeq X10 machine	617	ESBL	2313496	151	75.76	23	412.84
NHP448	Roberts et al., 2022	QIACube and QIAamp 96 DNA QIACube HT kit (Qiagen)	National Hospital for Tropical Diseases, Hanoi (NHTD)	clinical	2017-07-24	Illumina HiSeq X10 machine	617	ESBL	4113932	151	134.719	57	142.999
NHP449	Roberts et al., 2022	QIACube and QIAamp 96 DNA QIACube HT kit (Qiagen)	National Hospital for Tropical Diseases, Hanoi (NHTD)	clinical	2017-07-24	Illumina HiSeq X10 machine	617	ESBL	4947454	151	162.014	67	304.256
NHP1241	Roberts et al., 2022	QIACube and QIAamp 96 DNA QIACube HT kit (Qiagen)	National Hospital for Tropical Diseases, Hanoi (NHTD)	clinical	2017-09-19	Illumina HiSeq X10 machine	617	ESBL	2283608	151	74.7812	92	376.754
NHP1244	Roberts et al., 2022	QIACube and QIAamp 96 DNA QIACube HT kit (Qiagen)	National Hospital for Tropical Diseases, Hanoi (NHTD)	clinical	2017-09-19	Illumina HiSeq X10 machine	617	CR	2065664	151	67.6442	65	234.923
NHP756	Roberts et al., 2022	QIACube and QIAamp 96 DNA QIACube HT kit (Qiagen)	National Hospital for Tropical Diseases, Hanoi (NHTD)	clinical	2017-08-08	Illumina HiSeq X10 machine	617	ESBL	4268874	151	139.793	36	85.152
NHP825	Roberts et al., 2022	QIACube and QIAamp 96 DNA QIACube HT kit (Qiagen)	National Hospital for Tropical Diseases, Hanoi (NHTD)	clinical	2017-08-15	Illumina HiSeq X10 machine	617	ESBL	4615186	151	151.133	51	225.311
NHP831	Roberts et al., 2022	QIACube and QIAamp 96 DNA QIACube HT kit (Qiagen)	National Hospital for Tropical Diseases, Hanoi (NHTD)	clinical	2017-08-15	Illumina HiSeq X10 machine	617	ESBL	4092888	151	134.03	40	268.933
NHP890	Roberts et al., 2022	QIACube and QIAamp 96 DNA QIACube HT kit (Qiagen)	National Hospital for Tropical Diseases, Hanoi (NHTD)	clinical	2017-08-22	Illumina HiSeq X10 machine	617	ESBL	4268436	151	139.778	26	61.541
NHP891	Roberts et al., 2022	QIACube and QIAamp 96 DNA QIACube HT kit (Qiagen)	National Hospital for Tropical Diseases, Hanoi (NHTD)	clinical	2017-08-22	Illumina HiSeq X10 machine	617	CR	4342976	151	142.219	30	68.146
NHP895	Roberts et al., 2022	QIACube and QIAamp 96 DNA QIACube HT kit (Qiagen)	National Hospital for Tropical Diseases, Hanoi (NHTD)	clinical	2017-08-22	Illumina HiSeq X10 machine	617	ESBL	2611226	151	85.5097	83	315.606
NHP967	Roberts et al., 2022	QIACube and QIAamp 96 DNA QIACube HT kit (Qiagen)	National Hospital for Tropical Diseases, Hanoi (NHTD)	clinical	2017-08-29	Illumina HiSeq X10 machine	617	ESBL	2283830	151	74.7885	68	184.775
NHP971	Roberts et al., 2022	QIACube and QIAamp 96 DNA QIACube HT kit (Qiagen)	National Hospital for Tropical Diseases, Hanoi (NHTD)	clinical	2017-08-29	Illumina HiSeq X10 machine	617	ESBL	2409496	151	78.9037	58	180.779
NHP1027	Roberts et al., 2022	QIACube and QIAamp 96 DNA QIACube HT kit (Qiagen)	National Hospital for Tropical Diseases, Hanoi (NHTD)	clinical	2017-09-05	Illumina HiSeq X10 machine	617	ESBL	4455690	151	145.91	86	369.693
NHP1173	Roberts et al., 2022	QIACube and QIAamp 96 DNA QIACube HT kit (Qiagen)	National Hospital for Tropical Diseases, Hanoi (NHTD)	clinical	2017-09-12	Illumina HiSeq X10 machine	617	ESBL	4355180	151	142.619	47	240.366
NHP1177	Roberts et al., 2022	QIACube and QIAamp 96 DNA QIACube HT kit (Qiagen)	National Hospital for Tropical Diseases, Hanoi (NHTD)	clinical	2017-09-12	Illumina HiSeq X10 machine	617	CR	4725662	151	154.751	90	334.116
NHP601	Roberts et al., 2022	QIACube and QIAamp 96 DNA QIACube HT kit (Qiagen)	National Hospital for Tropical Diseases, Hanoi (NHTD)	clinical	2017-08-01	Illumina HiSeq X10 machine	131	ESBL	4192512	151	137.292	3	116.048
NHP606	Roberts et al., 2022	QIACube and QIAamp 96 DNA QIACube HT kit (Qiagen)	National Hospital for Tropical Diseases, Hanoi (NHTD)	clinical	2017-08-01	Illumina HiSeq X10 machine	410	ESBL	3920226	151	128.375	37	739.696
NHP603	Roberts et al., 2022	QIACube and QIAamp 96 DNA QIACube HT kit (Qiagen)	National Hospital for Tropical Diseases, Hanoi (NHTD)	clinical	2017-08-01	Illumina HiSeq X10 machine	1193	CR	4436350	151	145.277	10	24.127
NHP607	Roberts et al., 2022	QIACube and QIAamp 96 DNA QIACube HT kit (Qiagen)	National Hospital for Tropical Diseases, Hanoi (NHTD)	clinical	2017-08-01	Illumina HiSeq X10 machine	410	ESBL	4646222	151	152.15	32	765.096
NHP614	Roberts et al., 2022	QIACube and QIAamp 96 DNA QIACube HT kit (Qiagen)	National Hospital for Tropical Diseases, Hanoi (NHTD)	clinical	2017-08-01	Illumina HiSeq X10 machine	457	CR	3977228	151	130.242	12	211.29
NHP611	Roberts et al., 2022	QIACube and QIAamp 96 DNA QIACube HT kit (Qiagen)	National Hospital for Tropical Diseases, Hanoi (NHTD)	clinical	2017-08-01	Illumina HiSeq X10 machine	405	CR	2464044	151	80.69	6	126.337
NHP767	Roberts et al., 2022	QIACube and QIAamp 96 DNA QIACube HT kit (Qiagen)	National Hospital for Tropical Diseases, Hanoi (NHTD)	clinical	2017-08-08	Illumina HiSeq X10 machine	457	CR	4800344	151	157.197	21	619.17
NHP788	Roberts et al., 2022	QIACube and QIAamp 96 DNA QIACube HT kit (Qiagen)	National Hospital for Tropical Diseases, Hanoi (NHTD)	clinical	2017-08-11	Illumina HiSeq X10 machine	31	CR	3300178	151	108.071	4	123.616
NHP629	Roberts et al., 2022	QIACube and QIAamp 96 DNA QIACube HT kit (Qiagen)	National Hospital for Tropical Diseases, Hanoi (NHTD)	clinical	2017-08-03	Illumina HiSeq X10 machine	10	ESBL	3955942	151	129.545	36	275.744
NHP773	Roberts et al., 2022	QIACube and QIAamp 96 DNA QIACube HT kit (Qiagen)	National Hospital for Tropical Diseases, Hanoi (NHTD)	clinical	2017-08-08	Illumina HiSeq X10 machine	4981	ESBL	4569094	151	149.624	20	69.439
NHP841	Roberts et al., 2022	QIACube and QIAamp 96 DNA QIACube HT kit (Qiagen)	National Hospital for Tropical Diseases, Hanoi (NHTD)	clinical	2017-08-15	Illumina HiSeq X10 machine	4981	ESBL	4306312	151	141.019	20	173.406
NHP897	Roberts et al., 2022	QIACube and QIAamp 96 DNA QIACube HT kit (Qiagen)	National Hospital for Tropical Diseases, Hanoi (NHTD)	clinical	2017-08-22	Illumina HiSeq X10 machine	167	CR	4644098	151	152.08	39	320.679
NHP898	Roberts et al., 2022	QIACube and QIAamp 96 DNA QIACube HT kit (Qiagen)	National Hospital for Tropical Diseases, Hanoi (NHTD)	clinical	2017-08-22	Illumina HiSeq X10 machine	167	CR	4226796	151	138.415	12	172.899
NHP716	Roberts et al., 2022	QIACube and QIAamp 96 DNA QIACube HT kit (Qiagen)	National Hospital for Tropical Diseases, Hanoi (NHTD)	clinical	2017-08-05	Illumina HiSeq X10 machine	131	ESBL	3441000	151	112.682	40	341.941
NHP777	Roberts et al., 2022	QIACube and QIAamp 96 DNA QIACube HT kit (Qiagen)	National Hospital for Tropical Diseases, Hanoi (NHTD)	clinical	2017-08-08	Illumina HiSeq X10 machine	131	ESBL	3918708	151	128.326	46	185.183
NHP779	Roberts et al., 2022	QIACube and QIAamp 96 DNA QIACube HT kit (Qiagen)	National Hospital for Tropical Diseases, Hanoi (NHTD)	clinical	2017-08-08	Illumina HiSeq X10 machine	648	CR	3563370	151	116.69	26	202.625
NHP780	Roberts et al., 2022	QIACube and QIAamp 96 DNA QIACube HT kit (Qiagen)	National Hospital for Tropical Diseases, Hanoi (NHTD)	clinical	2017-08-08	Illumina HiSeq X10 machine	1193	CR	4016152	151	131.517	21	136.893
NHP899	Roberts et al., 2022	QIACube and QIAamp 96 DNA QIACube HT kit (Qiagen)	National Hospital for Tropical Diseases, Hanoi (NHTD)	clinical	2017-08-22	Illumina HiSeq X10 machine	1193	CR	1722352	151	56.4018	12	32.516
NHP792	Roberts et al., 2022	QIACube and QIAamp 96 DNA QIACube HT kit (Qiagen)	National Hospital for Tropical Diseases, Hanoi (NHTD)	clinical	2017-08-12	Illumina HiSeq X10 machine	3711	ESBL	3414296	151	111.808	15	149.784
NHP973	Roberts et al., 2022	QIACube and QIAamp 96 DNA QIACube HT kit (Qiagen)	National Hospital for Tropical Diseases, Hanoi (NHTD)	clinical	2017-08-29	Illumina HiSeq X10 machine	3711	ESBL	2398244	151	78.5352	5	29.457
NHP793	Roberts et al., 2022	QIACube and QIAamp 96 DNA QIACube HT kit (Qiagen)	National Hospital for Tropical Diseases, Hanoi (NHTD)	clinical	2017-08-14	Illumina HiSeq X10 machine	1193	ESBL	3949592	151	129.337	12	111.211
NHP920	Roberts et al., 2022	QIACube and QIAamp 96 DNA QIACube HT kit (Qiagen)	National Hospital for Tropical Diseases, Hanoi (NHTD)	clinical	2017-08-22	Illumina HiSeq X10 machine	648	CR	3877028	151	126.961	37	203.999
NHP858	Roberts et al., 2022	QIACube and QIAamp 96 DNA QIACube HT kit (Qiagen)	National Hospital for Tropical Diseases, Hanoi (NHTD)	clinical	2017-08-15	Illumina HiSeq X10 machine	167	CR	3779598	151	123.77	18	352.27
NHP923	Roberts et al., 2022	QIACube and QIAamp 96 DNA QIACube HT kit (Qiagen)	National Hospital for Tropical Diseases, Hanoi (NHTD)	clinical	2017-08-22	Illumina HiSeq X10 machine	93	ESBL	4951612	151	162.15	0	0
NHP859	Roberts et al., 2022	QIACube and QIAamp 96 DNA QIACube HT kit (Qiagen)	National Hospital for Tropical Diseases, Hanoi (NHTD)	clinical	2017-08-15	Illumina HiSeq X10 machine	167	CR	4639870	151	151.942	27	370.036
NHP860	Roberts et al., 2022	QIACube and QIAamp 96 DNA QIACube HT kit (Qiagen)	National Hospital for Tropical Diseases, Hanoi (NHTD)	clinical	2017-08-16	Illumina HiSeq X10 machine	354	CR	4148144	151	135.839	16	120.76
NHP1008	Roberts et al., 2022	QIACube and QIAamp 96 DNA QIACube HT kit (Qiagen)	National Hospital for Tropical Diseases, Hanoi (NHTD)	clinical	2017-08-30	Illumina HiSeq X10 machine	131	ESBL	2255460	151	73.8595	14	176.415
NHP1010	Roberts et al., 2022	QIACube and QIAamp 96 DNA QIACube HT kit (Qiagen)	National Hospital for Tropical Diseases, Hanoi (NHTD)	clinical	2017-08-30	Illumina HiSeq X10 machine	648	CR	2050542	151	67.149	11	90.163
NHP1076	Roberts et al., 2022	QIACube and QIAamp 96 DNA QIACube HT kit (Qiagen)	National Hospital for Tropical Diseases, Hanoi (NHTD)	clinical	2017-09-06	Illumina HiSeq X10 machine	131	ESBL	4512608	151	147.774	50	328.866
NHP1077	Roberts et al., 2022	QIACube and QIAamp 96 DNA QIACube HT kit (Qiagen)	National Hospital for Tropical Diseases, Hanoi (NHTD)	clinical	2017-09-06	Illumina HiSeq X10 machine	131	CR	3849458	151	126.058	3	53.101
NHP1078	Roberts et al., 2022	QIACube and QIAamp 96 DNA QIACube HT kit (Qiagen)	National Hospital for Tropical Diseases, Hanoi (NHTD)	clinical	2017-09-06	Illumina HiSeq X10 machine	4981	ESBL	3912730	151	128.13	27	232.715
NHP1251	Roberts et al., 2022	QIACube and QIAamp 96 DNA QIACube HT kit (Qiagen)	National Hospital for Tropical Diseases, Hanoi (NHTD)	clinical	2017-09-19	Illumina HiSeq X10 machine	131	CR	1988896	151	65.1303	20	47.782
NHP1254	Roberts et al., 2022	QIACube and QIAamp 96 DNA QIACube HT kit (Qiagen)	National Hospital for Tropical Diseases, Hanoi (NHTD)	clinical	2017-09-19	Illumina HiSeq X10 machine	131	CR	2273522	151	74.4509	19	147.089
NHP945	Roberts et al., 2022	QIACube and QIAamp 96 DNA QIACube HT kit (Qiagen)	National Hospital for Tropical Diseases, Hanoi (NHTD)	clinical	2017-08-25	Illumina HiSeq X10 machine	44	ESBL	3744372	151	122.617	45	953.543
NHP1784	Roberts et al., 2022	QIACube and QIAamp 96 DNA QIACube HT kit (Qiagen)	National Hospital for Tropical Diseases, Hanoi (NHTD)	clinical	2017-10-24	Illumina HiSeq X10 machine	617	ESBL	2060488	151	67.4747	13	74.8
NHP1786	Roberts et al., 2022	QIACube and QIAamp 96 DNA QIACube HT kit (Qiagen)	National Hospital for Tropical Diseases, Hanoi (NHTD)	clinical	2017-10-24	Illumina HiSeq X10 machine	617	ESBL	1589436	151	52.0492	24	125.665
NHP1788	Roberts et al., 2022	QIACube and QIAamp 96 DNA QIACube HT kit (Qiagen)	National Hospital for Tropical Diseases, Hanoi (NHTD)	clinical	2017-10-24	Illumina HiSeq X10 machine	617	CR	1682696	151	55.1032	25	303.679
NHP1790	Roberts et al., 2022	QIACube and QIAamp 96 DNA QIACube HT kit (Qiagen)	National Hospital for Tropical Diseases, Hanoi (NHTD)	clinical	2017-10-24	Illumina HiSeq X10 machine	617	CR	1999410	151	65.4746	21	395.594
NHP1795	Roberts et al., 2022	QIACube and QIAamp 96 DNA QIACube HT kit (Qiagen)	National Hospital for Tropical Diseases, Hanoi (NHTD)	clinical	2017-10-24	Illumina HiSeq X10 machine	354	ESBL	1725598	151	56.5081	40	552.611
NHP1793	Roberts et al., 2022	QIACube and QIAamp 96 DNA QIACube HT kit (Qiagen)	National Hospital for Tropical Diseases, Hanoi (NHTD)	clinical	2017-10-24	Illumina HiSeq X10 machine	617	CR	2179696	151	71.3784	25	228.979
NHP1835	Roberts et al., 2022	QIACube and QIAamp 96 DNA QIACube HT kit (Qiagen)	National Hospital for Tropical Diseases, Hanoi (NHTD)	clinical	2017-10-30	Illumina HiSeq X10 machine	617	ESBL	2075058	151	67.9518	23	85.342
NHP1837	Roberts et al., 2022	QIACube and QIAamp 96 DNA QIACube HT kit (Qiagen)	National Hospital for Tropical Diseases, Hanoi (NHTD)	clinical	2017-10-30	Illumina HiSeq X10 machine	617	ESBL	2121376	151	69.4686	17	74.236
NHP1839	Roberts et al., 2022	QIACube and QIAamp 96 DNA QIACube HT kit (Qiagen)	National Hospital for Tropical Diseases, Hanoi (NHTD)	clinical	2017-10-30	Illumina HiSeq X10 machine	617	ESBL	2371164	151	77.6484	28	127.259
NHP983	Roberts et al., 2022	QIACube and QIAamp 96 DNA QIACube HT kit (Qiagen)	National Hospital for Tropical Diseases, Hanoi (NHTD)	clinical	2017-08-29	Illumina HiSeq X10 machine	354	ESBL	4630498	151	151.635	49	1049.57
NHP981	Roberts et al., 2022	QIACube and QIAamp 96 DNA QIACube HT kit (Qiagen)	National Hospital for Tropical Diseases, Hanoi (NHTD)	clinical	2017-08-29	Illumina HiSeq X10 machine	617	ESBL	2135032	151	69.9158	16	76.888
NHP1037	Roberts et al., 2022	QIACube and QIAamp 96 DNA QIACube HT kit (Qiagen)	National Hospital for Tropical Diseases, Hanoi (NHTD)	clinical	2017-09-05	Illumina HiSeq X10 machine	617	CR	1457854	151	47.7403	13	78.215
NHP1258	Roberts et al., 2022	QIACube and QIAamp 96 DNA QIACube HT kit (Qiagen)	National Hospital for Tropical Diseases, Hanoi (NHTD)	clinical	2017-09-19	Illumina HiSeq X10 machine	617	ESBL	1958622	151	64.1389	18	85.304
NHP1262	Roberts et al., 2022	QIACube and QIAamp 96 DNA QIACube HT kit (Qiagen)	National Hospital for Tropical Diseases, Hanoi (NHTD)	clinical	2017-09-19	Illumina HiSeq X10 machine	617	ESBL	1649412	151	54.0132	29	149.335
NHP1261	Roberts et al., 2022	QIACube and QIAamp 96 DNA QIACube HT kit (Qiagen)	National Hospital for Tropical Diseases, Hanoi (NHTD)	clinical	2017-09-19	Illumina HiSeq X10 machine	354	ESBL	2487410	151	81.4551	8	48.017
NHP1394	Roberts et al., 2022	QIACube and QIAamp 96 DNA QIACube HT kit (Qiagen)	National Hospital for Tropical Diseases, Hanoi (NHTD)	clinical	2017-09-26	Illumina HiSeq X10 machine	617	ESBL	1816124	151	59.4725	35	789.978
NHP1391	Roberts et al., 2022	QIACube and QIAamp 96 DNA QIACube HT kit (Qiagen)	National Hospital for Tropical Diseases, Hanoi (NHTD)	clinical	2017-09-26	Illumina HiSeq X10 machine	617	ESBL	2342722	151	76.717	33	241.246
NHP1470	Roberts et al., 2022	QIACube and QIAamp 96 DNA QIACube HT kit (Qiagen)	National Hospital for Tropical Diseases, Hanoi (NHTD)	clinical	2017-10-03	Illumina HiSeq X10 machine	617	CR	2151830	151	70.4659	29	239.148
NHP1466	Roberts et al., 2022	QIACube and QIAamp 96 DNA QIACube HT kit (Qiagen)	National Hospital for Tropical Diseases, Hanoi (NHTD)	clinical	2017-10-03	Illumina HiSeq X10 machine	617	ESBL	2360486	151	77.2987	14	76.595
NHP950	Roberts et al., 2022	QIACube and QIAamp 96 DNA QIACube HT kit (Qiagen)	National Hospital for Tropical Diseases, Hanoi (NHTD)	clinical	2017-08-26	Illumina HiSeq X10 machine	354	CR	4978836	151	163.042	67	870.652
NHP953	Roberts et al., 2022	QIACube and QIAamp 96 DNA QIACube HT kit (Qiagen)	National Hospital for Tropical Diseases, Hanoi (NHTD)	clinical	2017-08-26	Illumina HiSeq X10 machine	354	ESBL	4218332	151	138.138	64	742.743
NHP987	Roberts et al., 2022	QIACube and QIAamp 96 DNA QIACube HT kit (Qiagen)	National Hospital for Tropical Diseases, Hanoi (NHTD)	clinical	2017-08-29	Illumina HiSeq X10 machine	354	CR	2294504	151	75.138	66	830.321
NHP990	Roberts et al., 2022	QIACube and QIAamp 96 DNA QIACube HT kit (Qiagen)	National Hospital for Tropical Diseases, Hanoi (NHTD)	clinical	2017-08-29	Illumina HiSeq X10 machine	354	ESBL	2162842	151	70.8265	55	693.801
NHP1044	Roberts et al., 2022	QIACube and QIAamp 96 DNA QIACube HT kit (Qiagen)	National Hospital for Tropical Diseases, Hanoi (NHTD)	clinical	2017-09-05	Illumina HiSeq X10 machine	354	ESBL	4201868	151	137.598	34	124.687
NHP1047	Roberts et al., 2022	QIACube and QIAamp 96 DNA QIACube HT kit (Qiagen)	National Hospital for Tropical Diseases, Hanoi (NHTD)	clinical	2017-09-05	Illumina HiSeq X10 machine	354	ESBL	4330468	151	141.81	37	124.563
NHP1043	Roberts et al., 2022	QIACube and QIAamp 96 DNA QIACube HT kit (Qiagen)	National Hospital for Tropical Diseases, Hanoi (NHTD)	clinical	2017-09-05	Illumina HiSeq X10 machine	69	ESBL	2259712	151	73.9987	17	108.499
NHP1150	Roberts et al., 2022	QIACube and QIAamp 96 DNA QIACube HT kit (Qiagen)	National Hospital for Tropical Diseases, Hanoi (NHTD)	clinical	2017-09-08	Illumina HiSeq X10 machine	405	ESBL	4579088	151	149.951	8	129.921
NHP1155	Roberts et al., 2022	QIACube and QIAamp 96 DNA QIACube HT kit (Qiagen)	National Hospital for Tropical Diseases, Hanoi (NHTD)	clinical	2017-09-08	Illumina HiSeq X10 machine	354	CR	4750190	151	155.554	26	196.853
NHP1016	Roberts et al., 2022	QIACube and QIAamp 96 DNA QIACube HT kit (Qiagen)	National Hospital for Tropical Diseases, Hanoi (NHTD)	clinical	2017-08-28	Illumina HiSeq X10 machine	4681	CR	5045452	151	165.223	14	581.501
NHP995	Roberts et al., 2022	QIACube and QIAamp 96 DNA QIACube HT kit (Qiagen)	National Hospital for Tropical Diseases, Hanoi (NHTD)	clinical	2017-08-29	Illumina HiSeq X10 machine	131	ESBL	1913840	151	62.6724	18	59.78
NHP1055	Roberts et al., 2022	QIACube and QIAamp 96 DNA QIACube HT kit (Qiagen)	National Hospital for Tropical Diseases, Hanoi (NHTD)	clinical	2017-09-05	Illumina HiSeq X10 machine	131	CR	4413484	151	144.528	60	338.182
NHP1187	Roberts et al., 2022	QIACube and QIAamp 96 DNA QIACube HT kit (Qiagen)	National Hospital for Tropical Diseases, Hanoi (NHTD)	clinical	2017-09-12	Illumina HiSeq X10 machine	410	ESBL	4551826	151	149.058	24	118.395
NHP1190	Roberts et al., 2022	QIACube and QIAamp 96 DNA QIACube HT kit (Qiagen)	National Hospital for Tropical Diseases, Hanoi (NHTD)	clinical	2017-09-12	Illumina HiSeq X10 machine	410	CR	4139216	151	135.547	26	118.653
NHP1265	Roberts et al., 2022	QIACube and QIAamp 96 DNA QIACube HT kit (Qiagen)	National Hospital for Tropical Diseases, Hanoi (NHTD)	clinical	2017-09-19	Illumina HiSeq X10 machine	410	ESBL	2063654	151	67.5784	23	118.898
NHP1006	Roberts et al., 2022	QIACube and QIAamp 96 DNA QIACube HT kit (Qiagen)	National Hospital for Tropical Diseases, Hanoi (NHTD)	clinical	2017-08-29	Illumina HiSeq X10 machine	224	CR	1945832	151	63.7201	36	364.689
NHP1061	Roberts et al., 2022	QIACube and QIAamp 96 DNA QIACube HT kit (Qiagen)	National Hospital for Tropical Diseases, Hanoi (NHTD)	clinical	2017-09-05	Illumina HiSeq X10 machine	167	ESBL	2565454	151	84.0108	69	514.918
NHP1064	Roberts et al., 2022	QIACube and QIAamp 96 DNA QIACube HT kit (Qiagen)	National Hospital for Tropical Diseases, Hanoi (NHTD)	clinical	2017-09-05	Illumina HiSeq X10 machine	224	ESBL	2437120	151	79.8083	10	49.165
NHP1272	Roberts et al., 2022	QIACube and QIAamp 96 DNA QIACube HT kit (Qiagen)	National Hospital for Tropical Diseases, Hanoi (NHTD)	clinical	2017-09-19	Illumina HiSeq X10 machine	167	ESBL	1589856	151	52.063	1	3.225
NHP1352	Roberts et al., 2022	QIACube and QIAamp 96 DNA QIACube HT kit (Qiagen)	National Hospital for Tropical Diseases, Hanoi (NHTD)	clinical	2017-09-26	Illumina HiSeq X10 machine	167	CR	2007546	151	65.741	108	4687.62
NHP1473	Roberts et al., 2022	QIACube and QIAamp 96 DNA QIACube HT kit (Qiagen)	National Hospital for Tropical Diseases, Hanoi (NHTD)	clinical	2017-10-03	Illumina HiSeq X10 machine	167	ESBL	1917986	151	62.8082	32	223.047
NHP1478	Roberts et al., 2022	QIACube and QIAamp 96 DNA QIACube HT kit (Qiagen)	National Hospital for Tropical Diseases, Hanoi (NHTD)	clinical	2017-10-03	Illumina HiSeq X10 machine	167	CR	2069364	151	67.7654	36	219.043
NHP1480	Roberts et al., 2022	QIACube and QIAamp 96 DNA QIACube HT kit (Qiagen)	National Hospital for Tropical Diseases, Hanoi (NHTD)	clinical	2017-10-03	Illumina HiSeq X10 machine	167	ESBL	1781586	151	58.3415	34	184.728
NHP1216	Roberts et al., 2022	QIACube and QIAamp 96 DNA QIACube HT kit (Qiagen)	National Hospital for Tropical Diseases, Hanoi (NHTD)	clinical	2017-09-12	Illumina HiSeq X10 machine	4204	ESBL	1919672	151	62.8634	12	193.246
NHP1283	Roberts et al., 2022	QIACube and QIAamp 96 DNA QIACube HT kit (Qiagen)	National Hospital for Tropical Diseases, Hanoi (NHTD)	clinical	2017-09-19	Illumina HiSeq X10 machine	10	ESBL	1958858	151	64.1466	44	202.984
NHP1200	Roberts et al., 2022	QIACube and QIAamp 96 DNA QIACube HT kit (Qiagen)	National Hospital for Tropical Diseases, Hanoi (NHTD)	clinical	2017-09-12	Illumina HiSeq X10 machine	131	ESBL	4425524	151	144.922	33	89.118
NHP1364	Roberts et al., 2022	QIACube and QIAamp 96 DNA QIACube HT kit (Qiagen)	National Hospital for Tropical Diseases, Hanoi (NHTD)	clinical	2017-09-26	Illumina HiSeq X10 machine	206	ESBL	2225930	151	72.8924	22	105.435
NHP1484	Roberts et al., 2022	QIACube and QIAamp 96 DNA QIACube HT kit (Qiagen)	National Hospital for Tropical Diseases, Hanoi (NHTD)	clinical	2017-10-03	Illumina HiSeq X10 machine	206	CR	1664028	151	54.4919	23	179.996
NHP1487	Roberts et al., 2022	QIACube and QIAamp 96 DNA QIACube HT kit (Qiagen)	National Hospital for Tropical Diseases, Hanoi (NHTD)	clinical	2017-10-03	Illumina HiSeq X10 machine	206	CR	1820028	151	59.6004	35	241.131
NHP1594	Roberts et al., 2022	QIACube and QIAamp 96 DNA QIACube HT kit (Qiagen)	National Hospital for Tropical Diseases, Hanoi (NHTD)	clinical	2017-10-10	Illumina HiSeq X10 machine	206	ESBL	2114174	151	69.2328	27	124.702
NHP1600	Roberts et al., 2022	QIACube and QIAamp 96 DNA QIACube HT kit (Qiagen)	National Hospital for Tropical Diseases, Hanoi (NHTD)	clinical	2017-10-10	Illumina HiSeq X10 machine	206	CR	1908836	151	62.5086	28	127.269
NHP1685	Roberts et al., 2022	QIACube and QIAamp 96 DNA QIACube HT kit (Qiagen)	National Hospital for Tropical Diseases, Hanoi (NHTD)	clinical	2017-10-17	Illumina HiSeq X10 machine	206	ESBL	2125560	151	69.6056	8	12.345
NHP1688	Roberts et al., 2022	QIACube and QIAamp 96 DNA QIACube HT kit (Qiagen)	National Hospital for Tropical Diseases, Hanoi (NHTD)	clinical	2017-10-17	Illumina HiSeq X10 machine	206	CR	2410842	151	78.9478	10	48.921
NHP1608	Roberts et al., 2022	QIACube and QIAamp 96 DNA QIACube HT kit (Qiagen)	National Hospital for Tropical Diseases, Hanoi (NHTD)	clinical	2017-10-10	Illumina HiSeq X10 machine	101	ESBL	2231866	151	73.0868	23	273.345
NHP1209	Roberts et al., 2022	QIACube and QIAamp 96 DNA QIACube HT kit (Qiagen)	National Hospital for Tropical Diseases, Hanoi (NHTD)	clinical	2017-09-12	Illumina HiSeq X10 machine	46	CR	2031544	151	66.5269	34	346.879
NHP1226	Roberts et al., 2022	QIACube and QIAamp 96 DNA QIACube HT kit (Qiagen)	National Hospital for Tropical Diseases, Hanoi (NHTD)	clinical	2017-09-12	Illumina HiSeq X10 machine	421	ESBL	1536490	151	50.3154	39	266.714
NHP1315	Roberts et al., 2022	QIACube and QIAamp 96 DNA QIACube HT kit (Qiagen)	National Hospital for Tropical Diseases, Hanoi (NHTD)	clinical	2017-09-19	Illumina HiSeq X10 machine	1312	ESBL	2351102	151	76.9914	35	83.04
NHP1312	Roberts et al., 2022	QIACube and QIAamp 96 DNA QIACube HT kit (Qiagen)	National Hospital for Tropical Diseases, Hanoi (NHTD)	clinical	2017-09-19	Illumina HiSeq X10 machine	410	ESBL	2401252	151	78.6337	16	380.702
NHP1396	Roberts et al., 2022	QIACube and QIAamp 96 DNA QIACube HT kit (Qiagen)	National Hospital for Tropical Diseases, Hanoi (NHTD)	clinical	2017-09-26	Illumina HiSeq X10 machine	410	CR	1558394	151	51.0327	22	596.989
NHP1400	Roberts et al., 2022	QIACube and QIAamp 96 DNA QIACube HT kit (Qiagen)	National Hospital for Tropical Diseases, Hanoi (NHTD)	clinical	2017-09-26	Illumina HiSeq X10 machine	410	ESBL	2087510	151	68.3596	20	727.58
NHP1494	Roberts et al., 2022	QIACube and QIAamp 96 DNA QIACube HT kit (Qiagen)	National Hospital for Tropical Diseases, Hanoi (NHTD)	clinical	2017-10-03	Illumina HiSeq X10 machine	410	ESBL	1862704	151	60.9979	10	83.128
NHP1498	Roberts et al., 2022	QIACube and QIAamp 96 DNA QIACube HT kit (Qiagen)	National Hospital for Tropical Diseases, Hanoi (NHTD)	clinical	2017-10-03	Illumina HiSeq X10 machine	410	ESBL	1904708	151	62.3734	32	1010.82
NHP1612	Roberts et al., 2022	QIACube and QIAamp 96 DNA QIACube HT kit (Qiagen)	National Hospital for Tropical Diseases, Hanoi (NHTD)	clinical	2017-10-10	Illumina HiSeq X10 machine	410	CR	2190388	151	71.7286	30	857.08
NHP1614	Roberts et al., 2022	QIACube and QIAamp 96 DNA QIACube HT kit (Qiagen)	National Hospital for Tropical Diseases, Hanoi (NHTD)	clinical	2017-10-10	Illumina HiSeq X10 machine	410	ESBL	1945044	151	63.6943	18	216.731
NHP1693	Roberts et al., 2022	QIACube and QIAamp 96 DNA QIACube HT kit (Qiagen)	National Hospital for Tropical Diseases, Hanoi (NHTD)	clinical	2017-10-17	Illumina HiSeq X10 machine	410	ESBL	2026022	151	66.3461	3	46.955
NHP1695	Roberts et al., 2022	QIACube and QIAamp 96 DNA QIACube HT kit (Qiagen)	National Hospital for Tropical Diseases, Hanoi (NHTD)	clinical	2017-10-17	Illumina HiSeq X10 machine	410	ESBL	2173166	151	71.1646	6	96.956
NHP1751	Roberts et al., 2022	QIACube and QIAamp 96 DNA QIACube HT kit (Qiagen)	National Hospital for Tropical Diseases, Hanoi (NHTD)	clinical	2017-10-24	Illumina HiSeq X10 machine	410	ESBL	1686474	151	55.2269	105	5584.71
NHP1571	Roberts et al., 2022	QIACube and QIAamp 96 DNA QIACube HT kit (Qiagen)	National Hospital for Tropical Diseases, Hanoi (NHTD)	clinical	2017-10-06	Illumina HiSeq X10 machine	617	ESBL	1577032	151	51.643	22	105.874
NHP1569	Roberts et al., 2022	QIACube and QIAamp 96 DNA QIACube HT kit (Qiagen)	National Hospital for Tropical Diseases, Hanoi (NHTD)	clinical	2017-10-06	Illumina HiSeq X10 machine	617	ESBL	2158138	151	70.6725	35	128.274
NHP1416	Roberts et al., 2022	QIACube and QIAamp 96 DNA QIACube HT kit (Qiagen)	National Hospital for Tropical Diseases, Hanoi (NHTD)	clinical	2017-09-26	Illumina HiSeq X10 machine	803	ESBL	1886056	151	61.7626	12	106.295
NHP1427	Roberts et al., 2022	QIACube and QIAamp 96 DNA QIACube HT kit (Qiagen)	National Hospital for Tropical Diseases, Hanoi (NHTD)	clinical	2017-09-26	Illumina HiSeq X10 machine	410	CR	2131828	151	69.8109	48	1970.29
NHP1347	Roberts et al., 2022	QIACube and QIAamp 96 DNA QIACube HT kit (Qiagen)	National Hospital for Tropical Diseases, Hanoi (NHTD)	clinical	2017-09-24	Illumina HiSeq X10 machine	1196	ESBL	2211648	151	72.4248	41	398.743
NHP1376	Roberts et al., 2022	QIACube and QIAamp 96 DNA QIACube HT kit (Qiagen)	National Hospital for Tropical Diseases, Hanoi (NHTD)	clinical	2017-09-26	Illumina HiSeq X10 machine	1196	CR	1998838	151	65.4559	34	318.703
NHP1507	Roberts et al., 2022	QIACube and QIAamp 96 DNA QIACube HT kit (Qiagen)	National Hospital for Tropical Diseases, Hanoi (NHTD)	clinical	2017-10-03	Illumina HiSeq X10 machine	1196	ESBL	1720210	151	56.3317	40	882.096
NHP1616	Roberts et al., 2022	QIACube and QIAamp 96 DNA QIACube HT kit (Qiagen)	National Hospital for Tropical Diseases, Hanoi (NHTD)	clinical	2017-10-10	Illumina HiSeq X10 machine	101	ESBL	2170996	151	71.0935	31	965.725
NHP1385	Roberts et al., 2022	QIACube and QIAamp 96 DNA QIACube HT kit (Qiagen)	National Hospital for Tropical Diseases, Hanoi (NHTD)	clinical	2017-09-25	Illumina HiSeq X10 machine	405	ESBL	1900484	151	62.2351	27	233.193
NHP1381	Roberts et al., 2022	QIACube and QIAamp 96 DNA QIACube HT kit (Qiagen)	National Hospital for Tropical Diseases, Hanoi (NHTD)	clinical	2017-09-25	Illumina HiSeq X10 machine	167	ESBL	2070164	151	67.7916	18	152.751
NHP1618	Roberts et al., 2022	QIACube and QIAamp 96 DNA QIACube HT kit (Qiagen)	National Hospital for Tropical Diseases, Hanoi (NHTD)	clinical	2017-10-10	Illumina HiSeq X10 machine	405	ESBL	2139426	151	70.0597	18	195.473
NHP1620	Roberts et al., 2022	QIACube and QIAamp 96 DNA QIACube HT kit (Qiagen)	National Hospital for Tropical Diseases, Hanoi (NHTD)	clinical	2017-10-10	Illumina HiSeq X10 machine	405	ESBL	2035950	151	66.6712	25	387.751
NHP1512	Roberts et al., 2022	QIACube and QIAamp 96 DNA QIACube HT kit (Qiagen)	National Hospital for Tropical Diseases, Hanoi (NHTD)	clinical	2017-10-03	Illumina HiSeq X10 machine	410	CR	2169158	151	71.0333	34	681.467
NHP1515	Roberts et al., 2022	QIACube and QIAamp 96 DNA QIACube HT kit (Qiagen)	National Hospital for Tropical Diseases, Hanoi (NHTD)	clinical	2017-10-03	Illumina HiSeq X10 machine	457	ESBL	2016528	151	66.0352	22	230.002
NHP1628	Roberts et al., 2022	QIACube and QIAamp 96 DNA QIACube HT kit (Qiagen)	National Hospital for Tropical Diseases, Hanoi (NHTD)	clinical	2017-10-10	Illumina HiSeq X10 machine	410	ESBL	2420426	151	79.2616	36	713.217
NHP1630	Roberts et al., 2022	QIACube and QIAamp 96 DNA QIACube HT kit (Qiagen)	National Hospital for Tropical Diseases, Hanoi (NHTD)	clinical	2017-10-10	Illumina HiSeq X10 machine	410	CR	2063832	151	67.5842	34	302.88
NHP1696	Roberts et al., 2022	QIACube and QIAamp 96 DNA QIACube HT kit (Qiagen)	National Hospital for Tropical Diseases, Hanoi (NHTD)	clinical	2017-10-17	Illumina HiSeq X10 machine	410	ESBL	2196604	151	71.9321	42	625.517
NHP1429	Roberts et al., 2022	QIACube and QIAamp 96 DNA QIACube HT kit (Qiagen)	National Hospital for Tropical Diseases, Hanoi (NHTD)	clinical	2017-09-27	Illumina HiSeq X10 machine	44	ESBL	2504864	151	82.0267	26	213.476
NHP1431	Roberts et al., 2022	QIACube and QIAamp 96 DNA QIACube HT kit (Qiagen)	National Hospital for Tropical Diseases, Hanoi (NHTD)	clinical	2017-09-27	Illumina HiSeq X10 machine	4981	ESBL	2129828	151	69.7454	31	151.735
NHP1518	Roberts et al., 2022	QIACube and QIAamp 96 DNA QIACube HT kit (Qiagen)	National Hospital for Tropical Diseases, Hanoi (NHTD)	clinical	2017-10-03	Illumina HiSeq X10 machine	44	ESBL	1705184	151	55.8396	30	456.977
NHP1632	Roberts et al., 2022	QIACube and QIAamp 96 DNA QIACube HT kit (Qiagen)	National Hospital for Tropical Diseases, Hanoi (NHTD)	clinical	2017-10-10	Illumina HiSeq X10 machine	46	ESBL	1949762	151	63.8488	24	79.225
NHP1634	Roberts et al., 2022	QIACube and QIAamp 96 DNA QIACube HT kit (Qiagen)	National Hospital for Tropical Diseases, Hanoi (NHTD)	clinical	2017-10-10	Illumina HiSeq X10 machine	44	CR	2023820	151	66.274	14	54.367
NHP1704	Roberts et al., 2022	QIACube and QIAamp 96 DNA QIACube HT kit (Qiagen)	National Hospital for Tropical Diseases, Hanoi (NHTD)	clinical	2017-10-17	Illumina HiSeq X10 machine	44	ESBL	2105692	151	68.955	18	60.363
NHP1962	Roberts et al., 2022	QIACube and QIAamp 96 DNA QIACube HT kit (Qiagen)	National Hospital for Tropical Diseases, Hanoi (NHTD)	clinical	2017-11-07	Illumina HiSeq X10 machine	44	ESBL	2283052	151	74.763	14	54.368
NHP1434	Roberts et al., 2022	QIACube and QIAamp 96 DNA QIACube HT kit (Qiagen)	National Hospital for Tropical Diseases, Hanoi (NHTD)	clinical	2017-09-28	Illumina HiSeq X10 machine	131	ESBL	1839676	151	60.2438	22	354.381
NHP1436	Roberts et al., 2022	QIACube and QIAamp 96 DNA QIACube HT kit (Qiagen)	National Hospital for Tropical Diseases, Hanoi (NHTD)	clinical	2017-09-28	Illumina HiSeq X10 machine	131	ESBL	2043004	151	66.9022	15	118.948
NHP1444	Roberts et al., 2022	QIACube and QIAamp 96 DNA QIACube HT kit (Qiagen)	National Hospital for Tropical Diseases, Hanoi (NHTD)	clinical	2017-09-28	Illumina HiSeq X10 machine	69	ESBL	1883974	151	61.6944	28	595.823
NHP1525	Roberts et al., 2022	QIACube and QIAamp 96 DNA QIACube HT kit (Qiagen)	National Hospital for Tropical Diseases, Hanoi (NHTD)	clinical	2017-10-03	Illumina HiSeq X10 machine	131	CR	1941704	151	63.5849	19	157.196
NHP1445	Roberts et al., 2022	QIACube and QIAamp 96 DNA QIACube HT kit (Qiagen)	National Hospital for Tropical Diseases, Hanoi (NHTD)	clinical	2017-09-29	Illumina HiSeq X10 machine	131	CR	1761472	151	57.6829	13	126.757
NHP1526	Roberts et al., 2022	QIACube and QIAamp 96 DNA QIACube HT kit (Qiagen)	National Hospital for Tropical Diseases, Hanoi (NHTD)	clinical	2017-10-03	Illumina HiSeq X10 machine	131	ESBL	1697254	151	55.5799	20	106.544
NHP1639	Roberts et al., 2022	QIACube and QIAamp 96 DNA QIACube HT kit (Qiagen)	National Hospital for Tropical Diseases, Hanoi (NHTD)	clinical	2017-10-10	Illumina HiSeq X10 machine	131	ESBL	2107218	151	69.005	6	43.963
NHP1712	Roberts et al., 2022	QIACube and QIAamp 96 DNA QIACube HT kit (Qiagen)	National Hospital for Tropical Diseases, Hanoi (NHTD)	clinical	2017-10-17	Illumina HiSeq X10 machine	131	ESBL	1756646	151	57.5248	26	123.161
NHP1452	Roberts et al., 2022	QIACube and QIAamp 96 DNA QIACube HT kit (Qiagen)	National Hospital for Tropical Diseases, Hanoi (NHTD)	clinical	2017-10-02	Illumina HiSeq X10 machine	648	CR	2010960	151	65.8528	96	487.453
NHP1454	Roberts et al., 2022	QIACube and QIAamp 96 DNA QIACube HT kit (Qiagen)	National Hospital for Tropical Diseases, Hanoi (NHTD)	clinical	2017-10-02	Illumina HiSeq X10 machine	648	ESBL	2281902	151	74.7254	80	436.3
NHP1528	Roberts et al., 2022	QIACube and QIAamp 96 DNA QIACube HT kit (Qiagen)	National Hospital for Tropical Diseases, Hanoi (NHTD)	clinical	2017-10-03	Illumina HiSeq X10 machine	648	CR	1771636	151	58.0157	25	197.409
NHP1530	Roberts et al., 2022	QIACube and QIAamp 96 DNA QIACube HT kit (Qiagen)	National Hospital for Tropical Diseases, Hanoi (NHTD)	clinical	2017-10-03	Illumina HiSeq X10 machine	648	CR	1746798	151	57.2023	27	202.649
NHP1646	Roberts et al., 2022	QIACube and QIAamp 96 DNA QIACube HT kit (Qiagen)	National Hospital for Tropical Diseases, Hanoi (NHTD)	clinical	2017-10-10	Illumina HiSeq X10 machine	648	ESBL	2264846	151	74.1668	99	505.432
NHP1535	Roberts et al., 2022	QIACube and QIAamp 96 DNA QIACube HT kit (Qiagen)	National Hospital for Tropical Diseases, Hanoi (NHTD)	clinical	2017-10-03	Illumina HiSeq X10 machine	224	ESBL	1873314	151	61.3453	29	871.689
NHP1650	Roberts et al., 2022	QIACube and QIAamp 96 DNA QIACube HT kit (Qiagen)	National Hospital for Tropical Diseases, Hanoi (NHTD)	clinical	2017-10-10	Illumina HiSeq X10 machine	224	ESBL	2027422	151	66.3919	29	875.115
NHP1714	Roberts et al., 2022	QIACube and QIAamp 96 DNA QIACube HT kit (Qiagen)	National Hospital for Tropical Diseases, Hanoi (NHTD)	clinical	2017-10-17	Illumina HiSeq X10 machine	648	ESBL	2034560	151	66.6257	28	79.978
NHP1536	Roberts et al., 2022	QIACube and QIAamp 96 DNA QIACube HT kit (Qiagen)	National Hospital for Tropical Diseases, Hanoi (NHTD)	clinical	2017-10-04	Illumina HiSeq X10 machine	117	ESBL	1788776	151	58.577	24	496.19
NHP1651	Roberts et al., 2022	QIACube and QIAamp 96 DNA QIACube HT kit (Qiagen)	National Hospital for Tropical Diseases, Hanoi (NHTD)	clinical	2017-10-10	Illumina HiSeq X10 machine	648	ESBL	1968194	151	64.4524	16	65.265
NHP1652	Roberts et al., 2022	QIACube and QIAamp 96 DNA QIACube HT kit (Qiagen)	National Hospital for Tropical Diseases, Hanoi (NHTD)	clinical	2017-10-10	Illumina HiSeq X10 machine	648	ESBL	1873040	151	61.3364	34	476.382
NHP1718	Roberts et al., 2022	QIACube and QIAamp 96 DNA QIACube HT kit (Qiagen)	National Hospital for Tropical Diseases, Hanoi (NHTD)	clinical	2017-10-17	Illumina HiSeq X10 machine	648	ESBL	2292032	151	75.0571	40	791.224
NHP1766	Roberts et al., 2022	QIACube and QIAamp 96 DNA QIACube HT kit (Qiagen)	National Hospital for Tropical Diseases, Hanoi (NHTD)	clinical	2017-10-24	Illumina HiSeq X10 machine	410	ESBL	2021170	151	66.1872	45	1157.32
NHP1576	Roberts et al., 2022	QIACube and QIAamp 96 DNA QIACube HT kit (Qiagen)	National Hospital for Tropical Diseases, Hanoi (NHTD)	clinical	2017-10-09	Illumina HiSeq X10 machine	167	ESBL	2014558	151	65.9707	18	36.417
NHP1667	Roberts et al., 2022	QIACube and QIAamp 96 DNA QIACube HT kit (Qiagen)	National Hospital for Tropical Diseases, Hanoi (NHTD)	clinical	2017-10-10	Illumina HiSeq X10 machine	1630	ESBL	2045492	151	66.9836	24	51.843
NHP1970	Roberts et al., 2022	QIACube and QIAamp 96 DNA QIACube HT kit (Qiagen)	National Hospital for Tropical Diseases, Hanoi (NHTD)	clinical	2017-11-07	Illumina HiSeq X10 machine	624	ESBL	2479134	151	81.1841	17	256.767
NHP1673	Roberts et al., 2022	QIACube and QIAamp 96 DNA QIACube HT kit (Qiagen)	National Hospital for Tropical Diseases, Hanoi (NHTD)	clinical	2017-10-12	Illumina HiSeq X10 machine	3711	CR	2085982	151	68.3096	7	90.831
NHP1676	Roberts et al., 2022	QIACube and QIAamp 96 DNA QIACube HT kit (Qiagen)	National Hospital for Tropical Diseases, Hanoi (NHTD)	clinical	2017-10-12	Illumina HiSeq X10 machine	410	ESBL	2251888	151	73.7425	56	1275.26
NHP2037	Roberts et al., 2022	QIACube and QIAamp 96 DNA QIACube HT kit (Qiagen)	National Hospital for Tropical Diseases, Hanoi (NHTD)	clinical	2017-11-14	Illumina HiSeq X10 machine	410	ESBL	1659916	151	54.3572	30	471.944
NHP2039	Roberts et al., 2022	QIACube and QIAamp 96 DNA QIACube HT kit (Qiagen)	National Hospital for Tropical Diseases, Hanoi (NHTD)	clinical	2017-11-14	Illumina HiSeq X10 machine	410	ESBL	1653812	151	54.1573	18	252.546
NHP2116	Roberts et al., 2022	QIACube and QIAamp 96 DNA QIACube HT kit (Qiagen)	National Hospital for Tropical Diseases, Hanoi (NHTD)	clinical	2017-11-21	Illumina HiSeq X10 machine	410	ESBL	1614036	151	52.8548	25	259.81
NHP1679	Roberts et al., 2022	QIACube and QIAamp 96 DNA QIACube HT kit (Qiagen)	National Hospital for Tropical Diseases, Hanoi (NHTD)	clinical	2017-10-15	Illumina HiSeq X10 machine	10	ESBL	2030512	151	66.4931	0	0
NHP1773	Roberts et al., 2022	QIACube and QIAamp 96 DNA QIACube HT kit (Qiagen)	National Hospital for Tropical Diseases, Hanoi (NHTD)	clinical	2017-10-24	Illumina HiSeq X10 machine	10	ESBL	2048502	151	67.0822	6	93.042
NHP1725	Roberts et al., 2022	QIACube and QIAamp 96 DNA QIACube HT kit (Qiagen)	National Hospital for Tropical Diseases, Hanoi (NHTD)	clinical	2017-10-17	Illumina HiSeq X10 machine	38	ESBL	1951550	151	63.9073	25	36.844
NHP2053	Roberts et al., 2022	QIACube and QIAamp 96 DNA QIACube HT kit (Qiagen)	National Hospital for Tropical Diseases, Hanoi (NHTD)	clinical	2017-11-14	Illumina HiSeq X10 machine	156	ESBL	1483224	151	48.5711	25	81.473
NHP1818	Roberts et al., 2022	QIACube and QIAamp 96 DNA QIACube HT kit (Qiagen)	National Hospital for Tropical Diseases, Hanoi (NHTD)	clinical	2017-10-24	Illumina HiSeq X10 machine	617	CR	2181280	151	71.4303	62	4807.89
NHP1822	Roberts et al., 2022	QIACube and QIAamp 96 DNA QIACube HT kit (Qiagen)	National Hospital for Tropical Diseases, Hanoi (NHTD)	clinical	2017-10-24	Illumina HiSeq X10 machine	617	ESBL	1398658	151	45.8018	24	248.708
NHP1904	Roberts et al., 2022	QIACube and QIAamp 96 DNA QIACube HT kit (Qiagen)	National Hospital for Tropical Diseases, Hanoi (NHTD)	clinical	2017-10-31	Illumina HiSeq X10 machine	46	ESBL	1873976	151	61.367	11	86.375
NHP1979	Roberts et al., 2022	QIACube and QIAamp 96 DNA QIACube HT kit (Qiagen)	National Hospital for Tropical Diseases, Hanoi (NHTD)	clinical	2017-11-07	Illumina HiSeq X10 machine	410	ESBL	2087718	151	68.3664	6	34.892
NHP1977	Roberts et al., 2022	QIACube and QIAamp 96 DNA QIACube HT kit (Qiagen)	National Hospital for Tropical Diseases, Hanoi (NHTD)	clinical	2017-11-07	Illumina HiSeq X10 machine	410	CR	2653256	151	86.8861	16	624.239
NHP1833	Roberts et al., 2022	QIACube and QIAamp 96 DNA QIACube HT kit (Qiagen)	National Hospital for Tropical Diseases, Hanoi (NHTD)	clinical	2017-10-27	Illumina HiSeq X10 machine	354	ESBL	2092762	151	68.5316	7	56.179
NHP1831	Roberts et al., 2022	QIACube and QIAamp 96 DNA QIACube HT kit (Qiagen)	National Hospital for Tropical Diseases, Hanoi (NHTD)	clinical	2017-10-27	Illumina HiSeq X10 machine	354	CR	2473212	151	80.9902	19	528.066
NHP1868	Roberts et al., 2022	QIACube and QIAamp 96 DNA QIACube HT kit (Qiagen)	National Hospital for Tropical Diseases, Hanoi (NHTD)	clinical	2017-10-31	Illumina HiSeq X10 machine	354	ESBL	2040434	151	66.818	10	188.211
NHP1874	Roberts et al., 2022	QIACube and QIAamp 96 DNA QIACube HT kit (Qiagen)	National Hospital for Tropical Diseases, Hanoi (NHTD)	clinical	2017-10-31	Illumina HiSeq X10 machine	617	ESBL	1942364	151	63.6065	33	285.714
NHP2008	Roberts et al., 2022	QIACube and QIAamp 96 DNA QIACube HT kit (Qiagen)	National Hospital for Tropical Diseases, Hanoi (NHTD)	clinical	2017-11-07	Illumina HiSeq X10 machine	6753	ESBL	2536782	151	83.0719	10	24.772
NHP1878	Roberts et al., 2022	QIACube and QIAamp 96 DNA QIACube HT kit (Qiagen)	National Hospital for Tropical Diseases, Hanoi (NHTD)	clinical	2017-10-31	Illumina HiSeq X10 machine	1193	ESBL	2262710	151	74.0969	5	13.334
NHP1984	Roberts et al., 2022	QIACube and QIAamp 96 DNA QIACube HT kit (Qiagen)	National Hospital for Tropical Diseases, Hanoi (NHTD)	clinical	2017-11-07	Illumina HiSeq X10 machine	1193	ESBL	2485334	151	81.3871	10	66.191
NHP1985	Roberts et al., 2022	QIACube and QIAamp 96 DNA QIACube HT kit (Qiagen)	National Hospital for Tropical Diseases, Hanoi (NHTD)	clinical	2017-11-07	Illumina HiSeq X10 machine	156	ESBL	2319514	151	75.957	4	65.713
NHP1986	Roberts et al., 2022	QIACube and QIAamp 96 DNA QIACube HT kit (Qiagen)	National Hospital for Tropical Diseases, Hanoi (NHTD)	clinical	2017-11-07	Illumina HiSeq X10 machine	1193	ESBL	2553370	151	83.6151	9	24.723
NHP2044	Roberts et al., 2022	QIACube and QIAamp 96 DNA QIACube HT kit (Qiagen)	National Hospital for Tropical Diseases, Hanoi (NHTD)	clinical	2017-11-14	Illumina HiSeq X10 machine	156	CR	1491286	151	48.8351	12	146.764
NHP2045	Roberts et al., 2022	QIACube and QIAamp 96 DNA QIACube HT kit (Qiagen)	National Hospital for Tropical Diseases, Hanoi (NHTD)	clinical	2017-11-14	Illumina HiSeq X10 machine	1193	ESBL	1829902	151	59.9237	9	24.702
NHP1953	Roberts et al., 2022	QIACube and QIAamp 96 DNA QIACube HT kit (Qiagen)	National Hospital for Tropical Diseases, Hanoi (NHTD)	clinical	2017-11-02	Illumina HiSeq X10 machine	131	ESBL	2246762	151	73.5746	12	55.306
NHP1955	Roberts et al., 2022	QIACube and QIAamp 96 DNA QIACube HT kit (Qiagen)	National Hospital for Tropical Diseases, Hanoi (NHTD)	clinical	2017-11-04	Illumina HiSeq X10 machine	617	ESBL	2442032	151	79.9691	28	188.477
NHP2020	Roberts et al., 2022	QIACube and QIAamp 96 DNA QIACube HT kit (Qiagen)	National Hospital for Tropical Diseases, Hanoi (NHTD)	clinical	2017-11-11	Illumina HiSeq X10 machine	38	CR	2343814	151	76.7528	70	279.874
NHP2061	Roberts et al., 2022	QIACube and QIAamp 96 DNA QIACube HT kit (Qiagen)	National Hospital for Tropical Diseases, Hanoi (NHTD)	clinical	2017-11-14	Illumina HiSeq X10 machine	617	ESBL	2034564	151	66.6258	22	144.552
NHP1997	Roberts et al., 2022	QIACube and QIAamp 96 DNA QIACube HT kit (Qiagen)	National Hospital for Tropical Diseases, Hanoi (NHTD)	clinical	2017-11-07	Illumina HiSeq X10 machine	167	ESBL	2347992	151	76.8896	7	22.867
NHP2016	Roberts et al., 2022	QIACube and QIAamp 96 DNA QIACube HT kit (Qiagen)	National Hospital for Tropical Diseases, Hanoi (NHTD)	clinical	2017-11-07	Illumina HiSeq X10 machine	10	ESBL	2430592	151	79.5945	8	23.865
NHP2017	Roberts et al., 2022	QIACube and QIAamp 96 DNA QIACube HT kit (Qiagen)	National Hospital for Tropical Diseases, Hanoi (NHTD)	clinical	2017-11-08	Illumina HiSeq X10 machine	648	CR	2235818	151	73.2162	49	265.911
NHP2165	Roberts et al., 2022	QIACube and QIAamp 96 DNA QIACube HT kit (Qiagen)	National Hospital for Tropical Diseases, Hanoi (NHTD)	clinical	2017-11-21	Illumina HiSeq X10 machine	648	ESBL	2605970	151	85.3376	59	288.335
NHP2031	Roberts et al., 2022	QIACube and QIAamp 96 DNA QIACube HT kit (Qiagen)	National Hospital for Tropical Diseases, Hanoi (NHTD)	clinical	2017-11-11	Illumina HiSeq X10 machine	457	CR	1683526	151	55.1304	20	202.592
NHP2048	Roberts et al., 2022	QIACube and QIAamp 96 DNA QIACube HT kit (Qiagen)	National Hospital for Tropical Diseases, Hanoi (NHTD)	clinical	2017-11-14	Illumina HiSeq X10 machine	131	ESBL	1812536	151	59.355	9	30.487
NHP2125	Roberts et al., 2022	QIACube and QIAamp 96 DNA QIACube HT kit (Qiagen)	National Hospital for Tropical Diseases, Hanoi (NHTD)	clinical	2017-11-21	Illumina HiSeq X10 machine	38	CR	2091826	151	68.5009	0	0
NHP2379	Roberts et al., 2022	QIACube and QIAamp 96 DNA QIACube HT kit (Qiagen)	National Hospital for Tropical Diseases, Hanoi (NHTD)	clinical	2017-12-05	Illumina HiSeq X10 machine	131	ESBL	1814622	151	59.4234	8	17.497
NHP2436	Roberts et al., 2022	QIACube and QIAamp 96 DNA QIACube HT kit (Qiagen)	National Hospital for Tropical Diseases, Hanoi (NHTD)	clinical	2017-12-12	Illumina HiSeq X10 machine	131	CR	2306260	151	75.523	15	41.405
NHP2170	Roberts et al., 2022	QIACube and QIAamp 96 DNA QIACube HT kit (Qiagen)	National Hospital for Tropical Diseases, Hanoi (NHTD)	clinical	2017-11-21	Illumina HiSeq X10 machine	448	ESBL	2400142	151	78.5974	7	62.521
NHP2175	Roberts et al., 2022	QIACube and QIAamp 96 DNA QIACube HT kit (Qiagen)	National Hospital for Tropical Diseases, Hanoi (NHTD)	clinical	2017-11-21	Illumina HiSeq X10 machine	648	ESBL	2379384	151	77.9176	14	32.346
NHP2176	Roberts et al., 2022	QIACube and QIAamp 96 DNA QIACube HT kit (Qiagen)	National Hospital for Tropical Diseases, Hanoi (NHTD)	clinical	2017-11-21	Illumina HiSeq X10 machine	648	ESBL	2221370	151	72.7431	17	79.304
NHP2307	Roberts et al., 2022	QIACube and QIAamp 96 DNA QIACube HT kit (Qiagen)	National Hospital for Tropical Diseases, Hanoi (NHTD)	clinical	2017-11-29	Illumina HiSeq X10 machine	648	CR	1475302	151	48.3117	21	117.373
NHP2440	Roberts et al., 2022	QIACube and QIAamp 96 DNA QIACube HT kit (Qiagen)	National Hospital for Tropical Diseases, Hanoi (NHTD)	clinical	2017-12-12	Illumina HiSeq X10 machine	448	ESBL	2261208	151	74.0477	19	267.269
NHP2444	Roberts et al., 2022	QIACube and QIAamp 96 DNA QIACube HT kit (Qiagen)	National Hospital for Tropical Diseases, Hanoi (NHTD)	clinical	2017-12-12	Illumina HiSeq X10 machine	448	CR	2074674	151	67.9393	20	246.32
NHP2530	Roberts et al., 2022	QIACube and QIAamp 96 DNA QIACube HT kit (Qiagen)	National Hospital for Tropical Diseases, Hanoi (NHTD)	clinical	2017-12-19	Illumina HiSeq X10 machine	448	ESBL	2179750	151	71.3802	16	291.329
NHP2536	Roberts et al., 2022	QIACube and QIAamp 96 DNA QIACube HT kit (Qiagen)	National Hospital for Tropical Diseases, Hanoi (NHTD)	clinical	2017-12-19	Illumina HiSeq X10 machine	448	CR	2150514	151	70.4228	5	130.229
NHP2050	Roberts et al., 2022	QIACube and QIAamp 96 DNA QIACube HT kit (Qiagen)	National Hospital for Tropical Diseases, Hanoi (NHTD)	clinical	2017-11-14	Illumina HiSeq X10 machine	10	CR	1820556	151	59.6177	18	158.6
NHP2149	Roberts et al., 2022	QIACube and QIAamp 96 DNA QIACube HT kit (Qiagen)	National Hospital for Tropical Diseases, Hanoi (NHTD)	clinical	2017-11-21	Illumina HiSeq X10 machine	648	ESBL	2131678	151	69.806	16	127.073
NHP2255	Roberts et al., 2022	QIACube and QIAamp 96 DNA QIACube HT kit (Qiagen)	National Hospital for Tropical Diseases, Hanoi (NHTD)	clinical	2017-11-28	Illumina HiSeq X10 machine	648	ESBL	2365332	151	77.4574	10	87.796
NHP2257	Roberts et al., 2022	QIACube and QIAamp 96 DNA QIACube HT kit (Qiagen)	National Hospital for Tropical Diseases, Hanoi (NHTD)	clinical	2017-11-28	Illumina HiSeq X10 machine	648	CR	2307318	151	75.5577	13	113.342
NHP2067	Roberts et al., 2022	QIACube and QIAamp 96 DNA QIACube HT kit (Qiagen)	National Hospital for Tropical Diseases, Hanoi (NHTD)	clinical	2017-11-16	Illumina HiSeq X10 machine	1193	ESBL	2209748	151	72.3625	31	208.34
NHP2073	Roberts et al., 2022	QIACube and QIAamp 96 DNA QIACube HT kit (Qiagen)	National Hospital for Tropical Diseases, Hanoi (NHTD)	clinical	2017-11-16	Illumina HiSeq X10 machine	167	ESBL	1856820	151	60.8052	39	488.775
NHP2086	Roberts et al., 2022	QIACube and QIAamp 96 DNA QIACube HT kit (Qiagen)	National Hospital for Tropical Diseases, Hanoi (NHTD)	clinical	2017-11-19	Illumina HiSeq X10 machine	167	CR	1642448	151	53.7852	36	488.561
NHP2089	Roberts et al., 2022	QIACube and QIAamp 96 DNA QIACube HT kit (Qiagen)	National Hospital for Tropical Diseases, Hanoi (NHTD)	clinical	2017-11-19	Illumina HiSeq X10 machine	354	CR	1812982	151	59.3697	6	35.815
NHP2184	Roberts et al., 2022	QIACube and QIAamp 96 DNA QIACube HT kit (Qiagen)	National Hospital for Tropical Diseases, Hanoi (NHTD)	clinical	2017-11-21	Illumina HiSeq X10 machine	354	CR	2584810	151	84.6447	3	35.068
NHP2129	Roberts et al., 2022	QIACube and QIAamp 96 DNA QIACube HT kit (Qiagen)	National Hospital for Tropical Diseases, Hanoi (NHTD)	clinical	2017-11-21	Illumina HiSeq X10 machine	354	ESBL	2214956	151	72.5331	8	67.226
NHP2127	Roberts et al., 2022	QIACube and QIAamp 96 DNA QIACube HT kit (Qiagen)	National Hospital for Tropical Diseases, Hanoi (NHTD)	clinical	2017-11-21	Illumina HiSeq X10 machine	354	CR	1925416	151	63.0515	7	50.596
NHP2077	Roberts et al., 2022	QIACube and QIAamp 96 DNA QIACube HT kit (Qiagen)	National Hospital for Tropical Diseases, Hanoi (NHTD)	clinical	2017-11-17	Illumina HiSeq X10 machine	354	ESBL	1898174	151	62.1594	9	44.051
NHP2348	Roberts et al., 2022	QIACube and QIAamp 96 DNA QIACube HT kit (Qiagen)	National Hospital for Tropical Diseases, Hanoi (NHTD)	clinical	2017-12-05	Illumina HiSeq X10 machine	156	ESBL	2126928	151	69.6504	5	148.936
NHP2449	Roberts et al., 2022	QIACube and QIAamp 96 DNA QIACube HT kit (Qiagen)	National Hospital for Tropical Diseases, Hanoi (NHTD)	clinical	2017-12-12	Illumina HiSeq X10 machine	131	ESBL	2366094	151	77.4824	22	235.442
NHP2136	Roberts et al., 2022	QIACube and QIAamp 96 DNA QIACube HT kit (Qiagen)	National Hospital for Tropical Diseases, Hanoi (NHTD)	clinical	2017-11-21	Illumina HiSeq X10 machine	156	ESBL	2472696	151	80.9733	19	307.711
NHP2141	Roberts et al., 2022	QIACube and QIAamp 96 DNA QIACube HT kit (Qiagen)	National Hospital for Tropical Diseases, Hanoi (NHTD)	clinical	2017-11-21	Illumina HiSeq X10 machine	8125	ESBL	2082064	151	68.1813	21	97.859
NHP2266	Roberts et al., 2022	QIACube and QIAamp 96 DNA QIACube HT kit (Qiagen)	National Hospital for Tropical Diseases, Hanoi (NHTD)	clinical	2017-11-28	Illumina HiSeq X10 machine	8125	ESBL	2587746	151	84.7408	33	84.937
NHP2270	Roberts et al., 2022	QIACube and QIAamp 96 DNA QIACube HT kit (Qiagen)	National Hospital for Tropical Diseases, Hanoi (NHTD)	clinical	2017-11-28	Illumina HiSeq X10 machine	8125	ESBL	2354390	151	77.0991	33	87.433
NHP2383	Roberts et al., 2022	QIACube and QIAamp 96 DNA QIACube HT kit (Qiagen)	National Hospital for Tropical Diseases, Hanoi (NHTD)	clinical	2017-12-05	Illumina HiSeq X10 machine	8125	ESBL	2046636	151	67.0211	38	511.875
NHP2385	Roberts et al., 2022	QIACube and QIAamp 96 DNA QIACube HT kit (Qiagen)	National Hospital for Tropical Diseases, Hanoi (NHTD)	clinical	2017-12-05	Illumina HiSeq X10 machine	8125	ESBL	2104736	151	68.9237	36	88.36
NHP2452	Roberts et al., 2022	QIACube and QIAamp 96 DNA QIACube HT kit (Qiagen)	National Hospital for Tropical Diseases, Hanoi (NHTD)	clinical	2017-12-12	Illumina HiSeq X10 machine	8125	ESBL	2094354	151	68.5837	48	116.294
NHP2456	Roberts et al., 2022	QIACube and QIAamp 96 DNA QIACube HT kit (Qiagen)	National Hospital for Tropical Diseases, Hanoi (NHTD)	clinical	2017-12-12	Illumina HiSeq X10 machine	156	ESBL	2293852	151	75.1167	11	435.69
NHP2145	Roberts et al., 2022	QIACube and QIAamp 96 DNA QIACube HT kit (Qiagen)	National Hospital for Tropical Diseases, Hanoi (NHTD)	clinical	2017-11-21	Illumina HiSeq X10 machine	127	ESBL	2235524	151	73.2066	0	0
NHP2276	Roberts et al., 2022	QIACube and QIAamp 96 DNA QIACube HT kit (Qiagen)	National Hospital for Tropical Diseases, Hanoi (NHTD)	clinical	2017-11-28	Illumina HiSeq X10 machine	1421	ESBL	2437894	151	79.8336	36	224.109
NHP2458	Roberts et al., 2022	QIACube and QIAamp 96 DNA QIACube HT kit (Qiagen)	National Hospital for Tropical Diseases, Hanoi (NHTD)	clinical	2017-12-12	Illumina HiSeq X10 machine	2690	ESBL	1965226	151	64.3552	22	141.508
NHP2461	Roberts et al., 2022	QIACube and QIAamp 96 DNA QIACube HT kit (Qiagen)	National Hospital for Tropical Diseases, Hanoi (NHTD)	clinical	2017-12-12	Illumina HiSeq X10 machine	127	ESBL	2529246	151	82.8251	10	119.689
NHP2107	Roberts et al., 2022	QIACube and QIAamp 96 DNA QIACube HT kit (Qiagen)	National Hospital for Tropical Diseases, Hanoi (NHTD)	clinical	2017-11-21	Illumina HiSeq X10 machine	1485	ESBL	1639108	151	53.6758	13	62.263
NHP2286	Roberts et al., 2022	QIACube and QIAamp 96 DNA QIACube HT kit (Qiagen)	National Hospital for Tropical Diseases, Hanoi (NHTD)	clinical	2017-11-28	Illumina HiSeq X10 machine	1485	ESBL	2482814	151	81.3046	19	151.685
NHP2281	Roberts et al., 2022	QIACube and QIAamp 96 DNA QIACube HT kit (Qiagen)	National Hospital for Tropical Diseases, Hanoi (NHTD)	clinical	2017-11-28	Illumina HiSeq X10 machine	1485	ESBL	2239922	151	73.3506	13	62.375
NHP2396	Roberts et al., 2022	QIACube and QIAamp 96 DNA QIACube HT kit (Qiagen)	National Hospital for Tropical Diseases, Hanoi (NHTD)	clinical	2017-12-05	Illumina HiSeq X10 machine	206	ESBL	2323502	151	76.0876	48	970.782
NHP2399	Roberts et al., 2022	QIACube and QIAamp 96 DNA QIACube HT kit (Qiagen)	National Hospital for Tropical Diseases, Hanoi (NHTD)	clinical	2017-12-05	Illumina HiSeq X10 machine	206	CR	2280296	151	74.6728	27	285.499
NHP2546	Roberts et al., 2022	QIACube and QIAamp 96 DNA QIACube HT kit (Qiagen)	National Hospital for Tropical Diseases, Hanoi (NHTD)	clinical	2017-12-19	Illumina HiSeq X10 machine	206	CR	2568966	151	84.1258	28	97.471
NHP2614	Roberts et al., 2022	QIACube and QIAamp 96 DNA QIACube HT kit (Qiagen)	National Hospital for Tropical Diseases, Hanoi (NHTD)	clinical	2017-12-26	Illumina HiSeq X10 machine	206	ESBL	1892892	151	61.9865	19	83.255
NHP2617	Roberts et al., 2022	QIACube and QIAamp 96 DNA QIACube HT kit (Qiagen)	National Hospital for Tropical Diseases, Hanoi (NHTD)	clinical	2017-12-26	Illumina HiSeq X10 machine	206	CR	1856862	151	60.8066	18	75.007
NHP2192	Roberts et al., 2022	QIACube and QIAamp 96 DNA QIACube HT kit (Qiagen)	National Hospital for Tropical Diseases, Hanoi (NHTD)	clinical	2017-11-21	Illumina HiSeq X10 machine	405	ESBL	2546434	151	83.388	25	306.609
NHP2189	Roberts et al., 2022	QIACube and QIAamp 96 DNA QIACube HT kit (Qiagen)	National Hospital for Tropical Diseases, Hanoi (NHTD)	clinical	2017-11-21	Illumina HiSeq X10 machine	354	ESBL	1989882	151	65.1626	3	11.724
NHP2320	Roberts et al., 2022	QIACube and QIAamp 96 DNA QIACube HT kit (Qiagen)	National Hospital for Tropical Diseases, Hanoi (NHTD)	clinical	2017-11-29	Illumina HiSeq X10 machine	354	CR	2681680	151	87.8169	44	868.434
NHP2195	Roberts et al., 2022	QIACube and QIAamp 96 DNA QIACube HT kit (Qiagen)	National Hospital for Tropical Diseases, Hanoi (NHTD)	clinical	2017-11-24	Illumina HiSeq X10 machine	8346	ESBL	2452434	151	80.3098	5	133.412
NHP2197	Roberts et al., 2022	QIACube and QIAamp 96 DNA QIACube HT kit (Qiagen)	National Hospital for Tropical Diseases, Hanoi (NHTD)	clinical	2017-11-24	Illumina HiSeq X10 machine	617	ESBL	2537168	151	83.0845	27	223.34
NHP2294	Roberts et al., 2022	QIACube and QIAamp 96 DNA QIACube HT kit (Qiagen)	National Hospital for Tropical Diseases, Hanoi (NHTD)	clinical	2017-11-28	Illumina HiSeq X10 machine	8346	ESBL	2208620	151	72.3256	18	501.783
NHP2295	Roberts et al., 2022	QIACube and QIAamp 96 DNA QIACube HT kit (Qiagen)	National Hospital for Tropical Diseases, Hanoi (NHTD)	clinical	2017-11-28	Illumina HiSeq X10 machine	10	ESBL	2189024	151	71.6839	25	303.751
NHP2298	Roberts et al., 2022	QIACube and QIAamp 96 DNA QIACube HT kit (Qiagen)	National Hospital for Tropical Diseases, Hanoi (NHTD)	clinical	2017-11-28	Illumina HiSeq X10 machine	10	ESBL	2228344	151	72.9715	32	304.711
NHP2300	Roberts et al., 2022	QIACube and QIAamp 96 DNA QIACube HT kit (Qiagen)	National Hospital for Tropical Diseases, Hanoi (NHTD)	clinical	2017-11-28	Illumina HiSeq X10 machine	10	ESBL	2016714	151	66.0413	65	1501.89
NHP2201	Roberts et al., 2022	QIACube and QIAamp 96 DNA QIACube HT kit (Qiagen)	National Hospital for Tropical Diseases, Hanoi (NHTD)	clinical	2017-11-27	Illumina HiSeq X10 machine	457	ESBL	2546616	151	83.3939	18	139.345
NHP2326	Roberts et al., 2022	QIACube and QIAamp 96 DNA QIACube HT kit (Qiagen)	National Hospital for Tropical Diseases, Hanoi (NHTD)	clinical	2017-11-29	Illumina HiSeq X10 machine	457	ESBL	2068692	151	67.7434	9	54.207
NHP2351	Roberts et al., 2022	QIACube and QIAamp 96 DNA QIACube HT kit (Qiagen)	National Hospital for Tropical Diseases, Hanoi (NHTD)	clinical	2017-12-05	Illumina HiSeq X10 machine	457	ESBL	2503814	151	81.9923	20	252.868
NHP2356	Roberts et al., 2022	QIACube and QIAamp 96 DNA QIACube HT kit (Qiagen)	National Hospital for Tropical Diseases, Hanoi (NHTD)	clinical	2017-12-05	Illumina HiSeq X10 machine	46	ESBL	2415020	151	79.0846	13	46.502
NHP2472	Roberts et al., 2022	QIACube and QIAamp 96 DNA QIACube HT kit (Qiagen)	National Hospital for Tropical Diseases, Hanoi (NHTD)	clinical	2017-12-12	Illumina HiSeq X10 machine	206	ESBL	2235140	151	73.194	17	36.782
NHP2551	Roberts et al., 2022	QIACube and QIAamp 96 DNA QIACube HT kit (Qiagen)	National Hospital for Tropical Diseases, Hanoi (NHTD)	clinical	2017-12-19	Illumina HiSeq X10 machine	1193	CR	1926566	151	63.0892	13	61.46
NHP2553	Roberts et al., 2022	QIACube and QIAamp 96 DNA QIACube HT kit (Qiagen)	National Hospital for Tropical Diseases, Hanoi (NHTD)	clinical	2017-12-19	Illumina HiSeq X10 machine	1193	ESBL	2389366	151	78.2445	12	28.406
NHP2330	Roberts et al., 2022	QIACube and QIAamp 96 DNA QIACube HT kit (Qiagen)	National Hospital for Tropical Diseases, Hanoi (NHTD)	clinical	2017-11-29	Illumina HiSeq X10 machine	226	ESBL	2176468	151	71.2727	11	69.434
NHP2358	Roberts et al., 2022	QIACube and QIAamp 96 DNA QIACube HT kit (Qiagen)	National Hospital for Tropical Diseases, Hanoi (NHTD)	clinical	2017-12-05	Illumina HiSeq X10 machine	1722	CR	2248094	151	73.6182	52	248.832
NHP2480	Roberts et al., 2022	QIACube and QIAamp 96 DNA QIACube HT kit (Qiagen)	National Hospital for Tropical Diseases, Hanoi (NHTD)	clinical	2017-12-12	Illumina HiSeq X10 machine	38	ESBL	2186290	151	71.5944	11	145.692
NHP2557	Roberts et al., 2022	QIACube and QIAamp 96 DNA QIACube HT kit (Qiagen)	National Hospital for Tropical Diseases, Hanoi (NHTD)	clinical	2017-12-19	Illumina HiSeq X10 machine	38	ESBL	2069118	151	67.7573	9	148.477
NHP2633	Roberts et al., 2022	QIACube and QIAamp 96 DNA QIACube HT kit (Qiagen)	National Hospital for Tropical Diseases, Hanoi (NHTD)	clinical	2017-12-26	Illumina HiSeq X10 machine	38	ESBL	2138506	151	70.0296	25	396.514
NHP2331	Roberts et al., 2022	QIACube and QIAamp 96 DNA QIACube HT kit (Qiagen)	National Hospital for Tropical Diseases, Hanoi (NHTD)	clinical	2017-12-02	Illumina HiSeq X10 machine	394	CR	2605924	151	85.3361	14	88.441
NHP2362	Roberts et al., 2022	QIACube and QIAamp 96 DNA QIACube HT kit (Qiagen)	National Hospital for Tropical Diseases, Hanoi (NHTD)	clinical	2017-12-05	Illumina HiSeq X10 machine	405	ESBL	1922658	151	62.9612	11	113.978
NHP2488	Roberts et al., 2022	QIACube and QIAamp 96 DNA QIACube HT kit (Qiagen)	National Hospital for Tropical Diseases, Hanoi (NHTD)	clinical	2017-12-12	Illumina HiSeq X10 machine	405	ESBL	2317160	151	75.8799	3	65.118
NHP2490	Roberts et al., 2022	QIACube and QIAamp 96 DNA QIACube HT kit (Qiagen)	National Hospital for Tropical Diseases, Hanoi (NHTD)	clinical	2017-12-12	Illumina HiSeq X10 machine	405	CR	2043086	151	66.9049	16	435.749
NHP2365	Roberts et al., 2022	QIACube and QIAamp 96 DNA QIACube HT kit (Qiagen)	National Hospital for Tropical Diseases, Hanoi (NHTD)	clinical	2017-12-04	Illumina HiSeq X10 machine	410	CR	2541954	151	83.2413	23	186.213
NHP2407	Roberts et al., 2022	QIACube and QIAamp 96 DNA QIACube HT kit (Qiagen)	National Hospital for Tropical Diseases, Hanoi (NHTD)	clinical	2017-12-05	Illumina HiSeq X10 machine	410	ESBL	2290928	151	75.0209	10	74.651
NHP2374	Roberts et al., 2022	QIACube and QIAamp 96 DNA QIACube HT kit (Qiagen)	National Hospital for Tropical Diseases, Hanoi (NHTD)	clinical	2017-12-05	Illumina HiSeq X10 machine	457	ESBL	1936036	151	63.3993	23	782.571
NHP2370	Roberts et al., 2022	QIACube and QIAamp 96 DNA QIACube HT kit (Qiagen)	National Hospital for Tropical Diseases, Hanoi (NHTD)	clinical	2017-12-05	Illumina HiSeq X10 machine	457	CR	1925066	151	63.0401	14	210.467
NHP2505	Roberts et al., 2022	QIACube and QIAamp 96 DNA QIACube HT kit (Qiagen)	National Hospital for Tropical Diseases, Hanoi (NHTD)	clinical	2017-12-12	Illumina HiSeq X10 machine	131	ESBL	2308950	151	75.6111	38	88.377
NHP2559	Roberts et al., 2022	QIACube and QIAamp 96 DNA QIACube HT kit (Qiagen)	National Hospital for Tropical Diseases, Hanoi (NHTD)	clinical	2017-12-19	Illumina HiSeq X10 machine	648	CR	2144110	151	70.2131	15	165.962
NHP2422	Roberts et al., 2022	QIACube and QIAamp 96 DNA QIACube HT kit (Qiagen)	National Hospital for Tropical Diseases, Hanoi (NHTD)	clinical	2017-12-08	Illumina HiSeq X10 machine	224	ESBL	2063986	151	67.5893	3	40.141
NHP2430	Roberts et al., 2022	QIACube and QIAamp 96 DNA QIACube HT kit (Qiagen)	National Hospital for Tropical Diseases, Hanoi (NHTD)	clinical	2017-12-08	Illumina HiSeq X10 machine	131	ESBL	2296912	151	75.2169	72	465.992
NHP2514	Roberts et al., 2022	QIACube and QIAamp 96 DNA QIACube HT kit (Qiagen)	National Hospital for Tropical Diseases, Hanoi (NHTD)	clinical	2017-12-11	Illumina HiSeq X10 machine	73	ESBL	2089636	151	68.4292	28	188.054
NHP2595	Roberts et al., 2022	QIACube and QIAamp 96 DNA QIACube HT kit (Qiagen)	National Hospital for Tropical Diseases, Hanoi (NHTD)	clinical	2017-12-19	Illumina HiSeq X10 machine	156	ESBL	2238348	151	73.2991	0	0
NHP2520	Roberts et al., 2022	QIACube and QIAamp 96 DNA QIACube HT kit (Qiagen)	National Hospital for Tropical Diseases, Hanoi (NHTD)	clinical	2017-12-12	Illumina HiSeq X10 machine	648	ESBL	1993808	151	65.2912	66	322.442
NHP2486	Roberts et al., 2022	QIACube and QIAamp 96 DNA QIACube HT kit (Qiagen)	National Hospital for Tropical Diseases, Hanoi (NHTD)	clinical	2017-12-13	Illumina HiSeq X10 machine	224	ESBL	2220718	151	72.7218	7	134.058
NHP2570	Roberts et al., 2022	QIACube and QIAamp 96 DNA QIACube HT kit (Qiagen)	National Hospital for Tropical Diseases, Hanoi (NHTD)	clinical	2017-12-19	Illumina HiSeq X10 machine	131	ESBL	2354664	151	77.1081	44	313.211
NHP2582	Roberts et al., 2022	QIACube and QIAamp 96 DNA QIACube HT kit (Qiagen)	National Hospital for Tropical Diseases, Hanoi (NHTD)	clinical	2017-12-19	Illumina HiSeq X10 machine	1722	ESBL	2138390	151	70.0258	45	448.803
NHP2655	Roberts et al., 2022	QIACube and QIAamp 96 DNA QIACube HT kit (Qiagen)	National Hospital for Tropical Diseases, Hanoi (NHTD)	clinical	2017-12-26	Illumina HiSeq X10 machine	1286	ESBL	2523382	151	82.6331	48	171.91
NHP2748	Roberts et al., 2022	QIACube and QIAamp 96 DNA QIACube HT kit (Qiagen)	National Hospital for Tropical Diseases, Hanoi (NHTD)	clinical	2018-01-02	Illumina HiSeq X10 machine	131	CR	2556474	151	83.7168	66	143.855
NHP2524	Roberts et al., 2022	QIACube and QIAamp 96 DNA QIACube HT kit (Qiagen)	National Hospital for Tropical Diseases, Hanoi (NHTD)	clinical	2017-12-15	Illumina HiSeq X10 machine	10	ESBL	2199620	151	72.0309	18	76.315
NHP2525	Roberts et al., 2022	QIACube and QIAamp 96 DNA QIACube HT kit (Qiagen)	National Hospital for Tropical Diseases, Hanoi (NHTD)	clinical	2017-12-17	Illumina HiSeq X10 machine	6823	non-ESBL	2169914	151	71.0581	15	102.417
NHP2658	Roberts et al., 2022	QIACube and QIAamp 96 DNA QIACube HT kit (Qiagen)	National Hospital for Tropical Diseases, Hanoi (NHTD)	clinical	2017-12-26	Illumina HiSeq X10 machine	448	non-ESBL	2279080	151	74.6329	21	236.393
NHP2661	Roberts et al., 2022	QIACube and QIAamp 96 DNA QIACube HT kit (Qiagen)	National Hospital for Tropical Diseases, Hanoi (NHTD)	clinical	2017-12-26	Illumina HiSeq X10 machine	448	non-ESBL	2366354	151	77.4909	39	710.883
NHP2754	Roberts et al., 2022	QIACube and QIAamp 96 DNA QIACube HT kit (Qiagen)	National Hospital for Tropical Diseases, Hanoi (NHTD)	clinical	2018-01-02	Illumina HiSeq X10 machine	1193	ESBL	2151932	151	70.4692	23	163.575
NHP2826	Roberts et al., 2022	QIACube and QIAamp 96 DNA QIACube HT kit (Qiagen)	National Hospital for Tropical Diseases, Hanoi (NHTD)	clinical	2018-01-09	Illumina HiSeq X10 machine	448	ESBL	1796406	151	58.8268	37	885.546
NHP2665	Roberts et al., 2022	QIACube and QIAamp 96 DNA QIACube HT kit (Qiagen)	National Hospital for Tropical Diseases, Hanoi (NHTD)	clinical	2017-12-26	Illumina HiSeq X10 machine	90	ESBL	2213728	151	72.4929	22	327.866
NHP2590	Roberts et al., 2022	QIACube and QIAamp 96 DNA QIACube HT kit (Qiagen)	National Hospital for Tropical Diseases, Hanoi (NHTD)	clinical	2017-12-19	Illumina HiSeq X10 machine	58	ESBL	2175270	151	71.2335	8	45.889
NHP2597	Roberts et al., 2022	QIACube and QIAamp 96 DNA QIACube HT kit (Qiagen)	National Hospital for Tropical Diseases, Hanoi (NHTD)	clinical	2017-12-19	Illumina HiSeq X10 machine	410	ESBL	1829440	151	59.9086	12	107.289
NHP2596	Roberts et al., 2022	QIACube and QIAamp 96 DNA QIACube HT kit (Qiagen)	National Hospital for Tropical Diseases, Hanoi (NHTD)	clinical	2017-12-19	Illumina HiSeq X10 machine	410	ESBL	2020552	151	66.1669	15	187.342
NHP2602	Roberts et al., 2022	QIACube and QIAamp 96 DNA QIACube HT kit (Qiagen)	National Hospital for Tropical Diseases, Hanoi (NHTD)	clinical	2017-12-21	Illumina HiSeq X10 machine	354	ESBL	2229162	151	72.9983	9	21.549
NHP2771	Roberts et al., 2022	QIACube and QIAamp 96 DNA QIACube HT kit (Qiagen)	National Hospital for Tropical Diseases, Hanoi (NHTD)	clinical	2018-01-02	Illumina HiSeq X10 machine	6823	ESBL	2369728	151	77.6014	6	120.371
NHP2843	Roberts et al., 2022	QIACube and QIAamp 96 DNA QIACube HT kit (Qiagen)	National Hospital for Tropical Diseases, Hanoi (NHTD)	clinical	2018-01-09	Illumina HiSeq X10 machine	448	ESBL	2332426	151	76.3799	18	232.556
NHP2848	Roberts et al., 2022	QIACube and QIAamp 96 DNA QIACube HT kit (Qiagen)	National Hospital for Tropical Diseases, Hanoi (NHTD)	clinical	2018-01-09	Illumina HiSeq X10 machine	448	ESBL	2302378	151	75.3959	20	239.738
NHP2785	Roberts et al., 2022	QIACube and QIAamp 96 DNA QIACube HT kit (Qiagen)	National Hospital for Tropical Diseases, Hanoi (NHTD)	clinical	2018-01-02	Illumina HiSeq X10 machine	167	CR	1986580	151	65.0545	126	4540.18
NHP2609	Roberts et al., 2022	QIACube and QIAamp 96 DNA QIACube HT kit (Qiagen)	National Hospital for Tropical Diseases, Hanoi (NHTD)	clinical	2017-12-25	Illumina HiSeq X10 machine	405	CR	2279790	151	74.6562	12	167.678
NHP2792	Roberts et al., 2022	QIACube and QIAamp 96 DNA QIACube HT kit (Qiagen)	National Hospital for Tropical Diseases, Hanoi (NHTD)	clinical	2018-01-02	Illumina HiSeq X10 machine	167	ESBL	2110500	151	69.1125	10	128.467
NHP2794	Roberts et al., 2022	QIACube and QIAamp 96 DNA QIACube HT kit (Qiagen)	National Hospital for Tropical Diseases, Hanoi (NHTD)	clinical	2018-01-02	Illumina HiSeq X10 machine	155	ESBL	2435222	151	79.7461	8	15.367
NHP2799	Roberts et al., 2022	QIACube and QIAamp 96 DNA QIACube HT kit (Qiagen)	National Hospital for Tropical Diseases, Hanoi (NHTD)	clinical	2018-01-02	Illumina HiSeq X10 machine	2179	ESBL	2105844	151	68.96	26	91.409
NHP2803	Roberts et al., 2022	QIACube and QIAamp 96 DNA QIACube HT kit (Qiagen)	National Hospital for Tropical Diseases, Hanoi (NHTD)	clinical	2018-01-02	Illumina HiSeq X10 machine	2179	CR	2298550	151	75.2705	6	61.23
NHP2809	Roberts et al., 2022	QIACube and QIAamp 96 DNA QIACube HT kit (Qiagen)	National Hospital for Tropical Diseases, Hanoi (NHTD)	clinical	2018-01-02	Illumina HiSeq X10 machine	155	CR	2613644	151	85.5889	13	22.393
E3585	Tuan-Anh et al., 2020	Wizard Kit (Promega)	Children’s Hospital 1, Ho Chi Minh (CH1-HCM)	clinical	2017-2019	MiSeq	405	ESBL	1436392	250	45.996	29	358.121
E3823	Tuan-Anh et al., 2020	Wizard Kit (Promega)	Children’s Hospital 1, Ho Chi Minh (CH1-HCM)	clinical	2017-2019	MiSeq	405	CR	1420346	250	54.4834	50	285.902
E4569	Tuan-Anh et al., 2020	Wizard Kit (Promega)	Children’s Hospital 1, Ho Chi Minh (CH1-HCM)	clinical	2017-2019	MiSeq	6726	ESBL	1202164	250	38.5365	2	16.041
E6348	Tuan-Anh et al., 2020	Wizard Kit (Promega)	Children’s Hospital 1, Ho Chi Minh (CH1-HCM)	clinical	2017-2019	MiSeq	998	CR	1596066	250	50.7571	15	113.632
E8964	Tuan-Anh et al., 2020	Wizard Kit (Promega)	Children’s Hospital 1, Ho Chi Minh (CH1-HCM)	clinical	2017-2019	MiSeq	127	ESBL	1820320	250	58.4575	9	47.267
E9833	Tuan-Anh et al., 2020	Wizard Kit (Promega)	Children’s Hospital 1, Ho Chi Minh (CH1-HCM)	clinical	2017-2019	MiSeq	48	ESBL	1546110	250	49.3512	20	143.108
E10085	Tuan-Anh et al., 2020	Wizard Kit (Promega)	Children’s Hospital 1, Ho Chi Minh (CH1-HCM)	clinical	2017-2019	MiSeq	1193	ESBL	1456838	250	46.6955	15	182.95
E10487	Tuan-Anh et al., 2020	Wizard Kit (Promega)	Children’s Hospital 1, Ho Chi Minh (CH1-HCM)	clinical	2017-2019	MiSeq	410	CR	2106216	250	67.1043	30	179.344
E10996	Tuan-Anh et al., 2020	Wizard Kit (Promega)	Children’s Hospital 1, Ho Chi Minh (CH1-HCM)	clinical	2017-2019	MiSeq	95	CR	1553202	250	47.5286	37	133.489
E11030	Tuan-Anh et al., 2020	Wizard Kit (Promega)	Children’s Hospital 1, Ho Chi Minh (CH1-HCM)	clinical	2017-2019	MiSeq	1193	ESBL	1048220	250	33.8909	8	83.812
E12236	Tuan-Anh et al., 2020	Wizard Kit (Promega)	Children’s Hospital 1, Ho Chi Minh (CH1-HCM)	clinical	2017-2019	MiSeq	113	ESBL	1170418	250	37.0568	6	13.426
E12241	Tuan-Anh et al., 2020	Wizard Kit (Promega)	Children’s Hospital 1, Ho Chi Minh (CH1-HCM)	clinical	2017-2019	MiSeq	95	CR	1032602	250	40.0831	13	171.233
E12674	Tuan-Anh et al., 2020	Wizard Kit (Promega)	Children’s Hospital 1, Ho Chi Minh (CH1-HCM)	clinical	2017-2019	MiSeq	1193	ESBL	1009280	250	32.5999	9	94.288
E14252	Tuan-Anh et al., 2020	Wizard Kit (Promega)	Children’s Hospital 1, Ho Chi Minh (CH1-HCM)	clinical	2017-2019	MiSeq	744	ESBL	1160728	250	36.3377	15	381.934
E14488	Tuan-Anh et al., 2020	Wizard Kit (Promega)	Children’s Hospital 1, Ho Chi Minh (CH1-HCM)	clinical	2017-2019	MiSeq	1193	CR	1305886	250	41.428	11	61.469
E15475	Tuan-Anh et al., 2020	Wizard Kit (Promega)	Children’s Hospital 1, Ho Chi Minh (CH1-HCM)	clinical	2017-2019	MiSeq	648	CR	987822	250	51.2702	31	127.605
E15476	Tuan-Anh et al., 2020	Wizard Kit (Promega)	Children’s Hospital 1, Ho Chi Minh (CH1-HCM)	clinical	2017-2019	MiSeq	648	ESBL	1071818	250	55.2854	47	143.518
E15583	Tuan-Anh et al., 2020	Wizard Kit (Promega)	Children’s Hospital 1, Ho Chi Minh (CH1-HCM)	clinical	2017-2019	MiSeq	648	ESBL	1144138	250	59.1865	37	134.048
E1456	Tuan-Anh et al., 2020	Wizard Kit (Promega)	Children’s Hospital 1, Ho Chi Minh (CH1-HCM)	clinical	2017-2019	MiSeq	127	ESBL	1591952	250	83.3725	11	82.806
E1965	Tuan-Anh et al., 2020	Wizard Kit (Promega)	Children’s Hospital 1, Ho Chi Minh (CH1-HCM)	clinical	2017-2019	MiSeq	1193	ESBL	839576	250	44.2677	17	75.878
E2408	Tuan-Anh et al., 2020	Wizard Kit (Promega)	Children’s Hospital 1, Ho Chi Minh (CH1-HCM)	clinical	2017-2019	MiSeq	1193	CR	1007664	250	52.0521	14	106.073
E2542	Tuan-Anh et al., 2020	Wizard Kit (Promega)	Children’s Hospital 1, Ho Chi Minh (CH1-HCM)	clinical	2017-2019	MiSeq	1193	ESBL	1116358	250	56.3314	15	101.13
E4751	Tuan-Anh et al., 2020	Wizard Kit (Promega)	Children’s Hospital 1, Ho Chi Minh (CH1-HCM)	clinical	2017-2019	MiSeq	410	ESBL	1082196	250	34.8053	27	205.329
E5306	Tuan-Anh et al., 2020	Wizard Kit (Promega)	Children’s Hospital 1, Ho Chi Minh (CH1-HCM)	clinical	2017-2019	MiSeq	69	ESBL	1095228	250	34.7266	36	558.528
E5610	Tuan-Anh et al., 2020	Wizard Kit (Promega)	Children’s Hospital 1, Ho Chi Minh (CH1-HCM)	clinical	2017-2019	MiSeq	1193	ESBL	1027576	250	32.9975	17	196.76
E5896	Tuan-Anh et al., 2020	Wizard Kit (Promega)	Children’s Hospital 1, Ho Chi Minh (CH1-HCM)	clinical	2017-2019	MiSeq	113	CR	1271482	250	48.4535	20	134.841
E6227	Tuan-Anh et al., 2020	Wizard Kit (Promega)	Children’s Hospital 1, Ho Chi Minh (CH1-HCM)	clinical	2017-2019	MiSeq	113	ESBL	1370922	250	52.2309	29	108.462
