# Supplementary material for: Large-scale analysis of putative plasmids in clinical multidrug-resistant Escherichia coli isolates from Vietnamese patients
Source: Front Microbiol. 2023 May 31;14:1094119. doi: 10.3389/fmicb.2023.1094119 (PMC10265513; doi:10.3389/fmicb.2023.1094119)
Supplement: Supplementary file 4 [file Table_2.XLSX]

## Sheet: TableS2
Supplementary Table S2. Summary of the AMR genes on plasmid contigs across isolates grouped in function of their antibiotic resistance phenotype.
Gene	Number of AMR genes				AMR Gene Family	Drug Class	Resistance Mechanism
	CR isolates (n = 197)	ESBL isolates (n = 550)	non-ESBL isolates (n = 4)	All isolates (n = 751)
rmtB	18	21	0	39	16S rRNA methyltransferase (G1405)	aminoglycoside antibiotic	antibiotic target alteration
TolC	1	4	0	5	ABC/MFS/RND antibiotic efflux pump	aminocoumarin antibiotic;aminoglycoside antibiotic;carbapenem;cephalosporin;cephamycin;disinfecting agents and antiseptics;fluoroquinolone antibiotic;glycylcycline;macrolide antibiotic;penam;penem;peptide antibiotic;phenicol antibiotic;rifamycin antibiotic;tetracycline antibiotic	antibiotic efflux
ADC-203	0	1	0	1	ADC ß-lactamases pending classification for carbapenemase activity	cephalosporin	antibiotic inactivation
APH(4)-Ia	0	1	0	1	Aminoglycoside 4-phosphotransferase APH(4)	aminoglycoside antibiotic	antibiotic inactivation
AAC(6')-Ib-cr6	82	83	0	165	Aminoglycoside 6'-N-acetyl transferase type Ib-cr	aminoglycoside antibiotic;fluoroquinolone antibiotic	antibiotic inactivation
AAC(6')-Ib-cr1	2	1	0	3	Aminoglycoside 6'-N-acetyl transferase type Ib-cr	aminoglycoside antibiotic;fluoroquinolone antibiotic	antibiotic inactivation
AAC(6')-Ib10	1	1	0	2	Aminoglycoside 6'-N-acetyltransferase	aminoglycoside antibiotic	antibiotic inactivation
AAC(6')-Ib7	0	1	0	1	Aminoglycoside 6'-N-acetyltransferase	aminoglycoside antibiotic	antibiotic inactivation
APH(6)-Id	52	142	1	195	Aminoglycoside 6-phosphotransferase APH(6)	aminoglycoside antibiotic	antibiotic inactivation
ANT(2'')-Ia	1	1	0	2	Aminoglycoside acetyltransferase ANT(2'')	aminoglycoside antibiotic	antibiotic inactivation
aadA5	59	147	0	206	Aminoglycoside acetyltransferase ANT(3'')	aminoglycoside antibiotic	antibiotic inactivation
aadA2	39	66	0	105	Aminoglycoside acetyltransferase ANT(3'')	aminoglycoside antibiotic	antibiotic inactivation
aadA16	40	33	0	73	Aminoglycoside acetyltransferase ANT(3'')	aminoglycoside antibiotic	antibiotic inactivation
ANT(3'')-IIa	10	40	0	50	Aminoglycoside acetyltransferase ANT(3'')	aminoglycoside antibiotic	antibiotic inactivation
aadA22	5	8	0	13	Aminoglycoside acetyltransferase ANT(3'')	aminoglycoside antibiotic	antibiotic inactivation
aadA17	2	7	0	9	Aminoglycoside acetyltransferase ANT(3'')	aminoglycoside antibiotic	antibiotic inactivation
aadA	1	6	0	7	Aminoglycoside acetyltransferase ANT(3'')	aminoglycoside antibiotic	antibiotic inactivation
AAC(3)-IId	32	83	0	115	Aminoglycoside N(3)-acetyltransferase	aminoglycoside antibiotic	antibiotic inactivation
AAC(3)-IIe	6	29	0	35	Aminoglycoside N(3)-acetyltransferase	aminoglycoside antibiotic	antibiotic inactivation
AAC(3)-IV	0	1	0	1	Aminoglycoside N(3)-acetyltransferase	aminoglycoside antibiotic	antibiotic inactivation
APH(3')-Ia	9	32	0	41	Aminoglycoside 3'-phosphotransferase	aminoglycoside antibiotic	antibiotic inactivation
APH(3')-IIa	3	9	0	12	Aminoglycoside 3'-phosphotransferase	aminoglycoside antibiotic	antibiotic inactivation
APH(3')-VIa	1	0	0	1	Aminoglycoside 3'-phosphotransferase	aminoglycoside antibiotic	antibiotic inactivation
APH(3'')-Ib	52	138	1	191	Aminoglycoside 3''-phosphotransferase	aminoglycoside antibiotic	antibiotic inactivation
msbA	0	1	0	1	ATP-binding cassette (ABC) antibiotic efflux pump	nitroimidazole antibiotic	antibiotic efflux
YojI	0	1	0	1	ATP-binding cassette (ABC) antibiotic efflux pump	peptide antibiotic	antibiotic efflux
BRP(MBL)	56	45	0	101	Bleomycin resistant protein	glycopeptide antibiotic	antibiotic inactivation
BLMT	3	9	0	12	Bleomycin resistant protein	glycopeptide antibiotic	antibiotic inactivation
cfrA	0	1	0	1	Cfr 23S ribosomal RNA methyltransferase	lincosamide antibiotic;oxazolidinone antibiotic;phenicol antibiotic;pleuromutilin antibiotic;streptogramin A antibiotic;streptogramin antibiotic	antibiotic target alteration
catB3	44	52	0	96	Chloramphenicol acetyltransferase (CAT)	phenicol antibiotic	antibiotic inactivation
catI	18	27	0	45	Chloramphenicol acetyltransferase (CAT)	phenicol antibiotic	antibiotic inactivation
catII_from_Escherichia_coli_K-12	4	16	0	20	Chloramphenicol acetyltransferase (CAT)	phenicol antibiotic	antibiotic inactivation
CMY-59	19	47	0	66	CMY ß-lactamase	cephamycin	antibiotic inactivation
CTX-M-27	19	87	0	106	CTX-M ß-lactamase	carbapenem;cephalosporin;penam	antibiotic inactivation
CTX-M-15	35	61	0	96	CTX-M ß-lactamase	cephalosporin;penam	antibiotic inactivation
CTX-M-55	15	53	0	68	CTX-M ß-lactamase	cephalosporin	antibiotic inactivation
CTX-M-14	4	14	0	18	CTX-M ß-lactamase	cephalosporin	antibiotic inactivation
CTX-M-64	1	2	0	3	CTX-M ß-lactamase	cephalosporin	antibiotic inactivation
CTX-M-65	1	2	0	3	CTX-M ß-lactamase	cephalosporin	antibiotic inactivation
CTX-M-123	0	1	0	1	CTX-M ß-lactamase	cephalosporin	antibiotic inactivation
CTX-M-3	0	1	0	1	CTX-M ß-lactamase	cephalosporin;cephamycin;penam	antibiotic inactivation
DHA-1	1	10	0	11	DHA ß-lactamase	cephalosporin;cephamycin	antibiotic inactivation
EC-15	2	4	0	6	EC ß-lactamase	cephalosporin	antibiotic inactivation
EC-5	0	2	0	2	EC ß-lactamase	cephalosporin	antibiotic inactivation
EC-8	0	1	0	1	EC ß-lactamase	cephalosporin	antibiotic inactivation
ErmB	29	120	0	149	Erm 23S ribosomal RNA methyltransferase	lincosamide antibiotic;macrolide antibiotic;streptogramin A antibiotic;streptogramin B antibiotic;streptogramin antibiotic	antibiotic target alteration
FosA3	12	12	0	24	Fosfomycin thiol transferase	phosphonic acid antibiotic	antibiotic inactivation
FosA4	2	2	0	4	Fosfomycin thiol transferase	phosphonic acid antibiotic	antibiotic inactivation
OmpA	0	1	0	1	General Bacterial Porin	peptide antibiotic	reduced permeability to antibiotic
marA	13	44	0	57	General Bacterial Porin; RND antibiotic efflux pump	carbapenem;cephalosporin;cephamycin;disinfecting agents and antiseptics;fluoroquinolone antibiotic;glycylcycline;monobactam;penam;penem;phenicol antibiotic;rifamycin antibiotic;tetracycline antibiotic	antibiotic efflux;reduced permeability to antibiotic
ramA	9	21	0	30	General Bacterial Porin; RND antibiotic efflux pump	carbapenem;cephalosporin;cephamycin;disinfecting agents and antiseptics;fluoroquinolone antibiotic;glycylcycline;monobactam;penam;penem;phenicol antibiotic;rifamycin antibiotic;tetracycline antibiotic	antibiotic efflux;reduced permeability to antibiotic
LpsB	1	3	0	4	Intrinsic peptide antibiotic resistant Lps	peptide antibiotic	reduced permeability to antibiotic
KPC-2	36	31	0	67	KPC ß-lactamase	carbapenem;cephalosporin;monobactam;penam	antibiotic inactivation
LAP-2	1	5	0	6	LAP ß-lactamase	cephalosporin;penam;penem	antibiotic inactivation
linG	5	24	0	29	Lincosamide nucleotidyltransferase (LNU)	lincosamide antibiotic	antibiotic inactivation
mphA	84	222	0	306	Macrolide phosphotransferase (MPH)	macrolide antibiotic	antibiotic inactivation
mphE	1	0	0	1	Macrolide phosphotransferase (MPH)	macrolide antibiotic	antibiotic inactivation
qacEdelta1	112	211	0	323	Major facilitator superfamily (MFS) antibiotic efflux pump	disinfecting agents and antiseptics	antibiotic efflux
tet(A)	34	122	1	157	Major facilitator superfamily (MFS) antibiotic efflux pump	tetracycline antibiotic	antibiotic efflux
tet(B)	41	68	1	110	Major facilitator superfamily (MFS) antibiotic efflux pump	tetracycline antibiotic	antibiotic efflux
floR	14	49	0	63	Major facilitator superfamily (MFS) antibiotic efflux pump	phenicol antibiotic	antibiotic efflux
cmlA1	3	20	0	23	Major facilitator superfamily (MFS) antibiotic efflux pump	phenicol antibiotic	antibiotic efflux
mdtN	5	10	0	15	Major facilitator superfamily (MFS) antibiotic efflux pump	disinfecting agents and antiseptics;nucleoside antibiotic	antibiotic efflux
mdtO	5	10	0	15	Major facilitator superfamily (MFS) antibiotic efflux pump	disinfecting agents and antiseptics;nucleoside antibiotic	antibiotic efflux
mdtP	5	10	0	15	Major facilitator superfamily (MFS) antibiotic efflux pump	disinfecting agents and antiseptics;nucleoside antibiotic	antibiotic efflux
QepA2	4	9	0	13	Major facilitator superfamily (MFS) antibiotic efflux pump	fluoroquinolone antibiotic	antibiotic efflux
QepA4	3	6	0	9	Major facilitator superfamily (MFS) antibiotic efflux pump	fluoroquinolone antibiotic	antibiotic efflux
mdtM	2	3	0	5	Major facilitator superfamily (MFS) antibiotic efflux pump	disinfecting agents and antiseptics;fluoroquinolone antibiotic;lincosamide antibiotic;nucleoside antibiotic;phenicol antibiotic	antibiotic efflux
cmlA5	1	3	0	4	Major facilitator superfamily (MFS) antibiotic efflux pump	phenicol antibiotic	antibiotic efflux
emrK	1	3	0	4	Major facilitator superfamily (MFS) antibiotic efflux pump	tetracycline antibiotic	antibiotic efflux
emrY	1	3	0	4	Major facilitator superfamily (MFS) antibiotic efflux pump	tetracycline antibiotic	antibiotic efflux
Acinetobacter_baumannii_AbaF	1	2	0	3	Major facilitator superfamily (MFS) antibiotic efflux pump	phosphonic acid antibiotic	antibiotic efflux
Acinetobacter_baumannii_AmvA	1	2	0	3	Major facilitator superfamily (MFS) antibiotic efflux pump	disinfecting agents and antiseptics;macrolide antibiotic	antibiotic efflux
emrA	0	2	0	2	Major facilitator superfamily (MFS) antibiotic efflux pump	fluoroquinolone antibiotic	antibiotic efflux
emrB	0	2	0	2	Major facilitator superfamily (MFS) antibiotic efflux pump	fluoroquinolone antibiotic	antibiotic efflux
emrR	0	2	0	2	Major facilitator superfamily (MFS) antibiotic efflux pump	fluoroquinolone antibiotic	antibiotic efflux
cmlA6	0	1	0	1	Major facilitator superfamily (MFS) antibiotic efflux pump	phenicol antibiotic	antibiotic efflux
Escherichia_coli_mdfA	0	1	0	1	Major facilitator superfamily (MFS) antibiotic efflux pump	disinfecting agents and antiseptics;tetracycline antibiotic	antibiotic efflux
mdtG	0	1	0	1	Major facilitator superfamily (MFS) antibiotic efflux pump	phosphonic acid antibiotic	antibiotic efflux
mdtH	0	1	0	1	Major facilitator superfamily (MFS) antibiotic efflux pump	fluoroquinolone antibiotic	antibiotic efflux
tet(39)	1	0	0	1	Major facilitator superfamily (MFS) antibiotic efflux pump	tetracycline antibiotic	antibiotic efflux
MCR-1.1	1	8	0	9	MCR phosphoethanolamine transferase	peptide antibiotic	antibiotic target alteration
MCR-3.5	0	1	0	1	MCR phosphoethanolamine transferase	peptide antibiotic	antibiotic target alteration
evgA	2	5	0	7	MFS/RND antibiotic efflux pump	fluoroquinolone antibiotic;macrolide antibiotic;penam;tetracycline antibiotic	antibiotic efflux
evgS	2	5	0	7	MFS/RND antibiotic efflux pump	fluoroquinolone antibiotic;macrolide antibiotic;penam;tetracycline antibiotic	antibiotic efflux
H-NS	0	4	0	4	MFS/RND antibiotic efflux pump	cephalosporin;cephamycin;fluoroquinolone antibiotic;macrolide antibiotic;penam;tetracycline antibiotic	antibiotic efflux
msrE	1	0	0	1	Msr-type ABC-F protein	macrolide antibiotic;streptogramin antibiotic	antibiotic target protection
abeM	2	3	0	5	Multidrug and toxic compound extrusion (MATE) transporter	disinfecting agents and antiseptics;fluoroquinolone antibiotic	antibiotic efflux
NDM-5	46	37	0	83	NDM ß-lactamase	carbapenem;cephalosporin;cephamycin;penam	antibiotic inactivation
NDM-4	3	4	0	7	NDM ß-lactamase	carbapenem;cephalosporin;cephamycin;penam;penem	antibiotic inactivation
NDM-1	4	1	0	5	NDM ß-lactamase	carbapenem;cephalosporin;cephamycin;penam	antibiotic inactivation
NDM-7	3	2	0	5	NDM ß-lactamase	carbapenem;cephalosporin;cephamycin;penam	antibiotic inactivation
OXA-1	44	52	0	96	OXA ß-lactamase	carbapenem;cephalosporin;penam	antibiotic inactivation
OXA-48	12	7	0	19	OXA ß-lactamase	carbapenem;cephalosporin;penam	antibiotic inactivation
OXA-181	10	7	0	17	OXA ß-lactamase	carbapenem;cephalosporin;penam	antibiotic inactivation
OXA-9	1	1	0	2	OXA ß-lactamase	carbapenem;cephalosporin;penam	antibiotic inactivation
OXA-23	0	1	0	1	OXA ß-lactamase	carbapenem;cephalosporin;penam	antibiotic inactivation
OXA-339	0	1	0	1	OXA ß-lactamase	carbapenem;cephalosporin;penam	antibiotic inactivation
OXA-70	1	0	0	1	OXA ß-lactamase	carbapenem;cephalosporin;penam	antibiotic inactivation
OXA-928	0	1	0	1	OXA ß-lactamase	carbapenem;cephalosporin;penam	antibiotic inactivation
eptA	3	9	0	12	Pmr phosphoethanolamine transferase	peptide antibiotic	antibiotic target alteration
PmrF	0	2	0	2	Pmr phosphoethanolamine transferase	peptide antibiotic	antibiotic efflux;antibiotic target alteration
ugd	0	1	0	1	Pmr phosphoethanolamine transferase	peptide antibiotic	antibiotic target alteration
QnrS1	17	32	0	49	Quinolone resistance protein (qnr)	fluoroquinolone antibiotic	antibiotic target protection
QnrB6	8	4	0	12	Quinolone resistance protein (qnr)	fluoroquinolone antibiotic	antibiotic target protection
QnrB4	1	10	0	11	Quinolone resistance protein (qnr)	fluoroquinolone antibiotic	antibiotic target protection
QnrS2	1	2	0	3	Quinolone resistance protein (qnr)	fluoroquinolone antibiotic	antibiotic target protection
cpxA	28	72	0	100	Resistance-nodulation-cell division (RND) antibiotic efflux pump	aminocoumarin antibiotic;aminoglycoside antibiotic	antibiotic efflux
gadW	15	22	0	37	Resistance-nodulation-cell division (RND) antibiotic efflux pump	fluoroquinolone antibiotic;macrolide antibiotic;penam	antibiotic efflux
gadX	15	22	0	37	Resistance-nodulation-cell division (RND) antibiotic efflux pump	fluoroquinolone antibiotic;macrolide antibiotic;penam	antibiotic efflux
mdtE	15	22	0	37	Resistance-nodulation-cell division (RND) antibiotic efflux pump	fluoroquinolone antibiotic;macrolide antibiotic;penam	antibiotic efflux
mdtF	15	22	0	37	Resistance-nodulation-cell division (RND) antibiotic efflux pump	fluoroquinolone antibiotic;macrolide antibiotic;penam	antibiotic efflux
CRP	4	11	0	15	Resistance-nodulation-cell division (RND) antibiotic efflux pump	fluoroquinolone antibiotic;macrolide antibiotic;penam	antibiotic efflux
AcrE	1	9	0	10	Resistance-nodulation-cell division (RND) antibiotic efflux pump	cephalosporin;cephamycin;fluoroquinolone antibiotic;penam	antibiotic efflux
AcrF	1	9	0	10	Resistance-nodulation-cell division (RND) antibiotic efflux pump	cephalosporin;cephamycin;fluoroquinolone antibiotic;penam	antibiotic efflux
AcrS	1	9	0	10	Resistance-nodulation-cell division (RND) antibiotic efflux pump	cephalosporin;cephamycin;disinfecting agents and antiseptics;fluoroquinolone antibiotic;glycylcycline;penam;phenicol antibiotic;rifamycin antibiotic;tetracycline antibiotic	antibiotic efflux
adeI	1	3	0	4	Resistance-nodulation-cell division (RND) antibiotic efflux pump	carbapenem;cephalosporin;diaminopyrimidine antibiotic;fluoroquinolone antibiotic;lincosamide antibiotic;macrolide antibiotic;penem;phenicol antibiotic;rifamycin antibiotic;tetracycline antibiotic	antibiotic efflux
adeJ	1	3	0	4	Resistance-nodulation-cell division (RND) antibiotic efflux pump	carbapenem;cephalosporin;diaminopyrimidine antibiotic;fluoroquinolone antibiotic;lincosamide antibiotic;macrolide antibiotic;penem;phenicol antibiotic;rifamycin antibiotic;tetracycline antibiotic	antibiotic efflux
adeK	1	3	0	4	Resistance-nodulation-cell division (RND) antibiotic efflux pump	carbapenem;cephalosporin;diaminopyrimidine antibiotic;fluoroquinolone antibiotic;lincosamide antibiotic;macrolide antibiotic;penem;phenicol antibiotic;rifamycin antibiotic;tetracycline antibiotic	antibiotic efflux
oqxA	1	2	0	3	Resistance-nodulation-cell division (RND) antibiotic efflux pump	diaminopyrimidine antibiotic;fluoroquinolone antibiotic;glycylcycline;nitrofuran antibiotic;tetracycline antibiotic	antibiotic efflux
oqxB	1	2	0	3	Resistance-nodulation-cell division (RND) antibiotic efflux pump	diaminopyrimidine antibiotic;fluoroquinolone antibiotic;glycylcycline;nitrofuran antibiotic;tetracycline antibiotic	antibiotic efflux
acrB	0	2	0	2	Resistance-nodulation-cell division (RND) antibiotic efflux pump	cephalosporin;disinfecting agents and antiseptics;fluoroquinolone antibiotic;glycylcycline;penam;phenicol antibiotic;rifamycin antibiotic;tetracycline antibiotic	antibiotic efflux
acrD	0	2	0	2	Resistance-nodulation-cell division (RND) antibiotic efflux pump	aminoglycoside antibiotic	antibiotic efflux
adeF	0	2	0	2	Resistance-nodulation-cell division (RND) antibiotic efflux pump	fluoroquinolone antibiotic;tetracycline antibiotic	antibiotic efflux
adeG	0	2	0	2	Resistance-nodulation-cell division (RND) antibiotic efflux pump	fluoroquinolone antibiotic;tetracycline antibiotic	antibiotic efflux
adeH	0	2	0	2	Resistance-nodulation-cell division (RND) antibiotic efflux pump	fluoroquinolone antibiotic;tetracycline antibiotic	antibiotic efflux
adeL	0	2	0	2	Resistance-nodulation-cell division (RND) antibiotic efflux pump	fluoroquinolone antibiotic;tetracycline antibiotic	antibiotic efflux
adeN	1	1	0	2	Resistance-nodulation-cell division (RND) antibiotic efflux pump	carbapenem;cephalosporin;diaminopyrimidine antibiotic;fluoroquinolone antibiotic;lincosamide antibiotic;macrolide antibiotic;penem;phenicol antibiotic;rifamycin antibiotic;tetracycline antibiotic	antibiotic efflux
baeR	0	2	0	2	Resistance-nodulation-cell division (RND) antibiotic efflux pump	aminocoumarin antibiotic;aminoglycoside antibiotic	antibiotic efflux
baeS	0	2	0	2	Resistance-nodulation-cell division (RND) antibiotic efflux pump	aminocoumarin antibiotic;aminoglycoside antibiotic	antibiotic efflux
Escherichia_coli_acrA	0	2	0	2	Resistance-nodulation-cell division (RND) antibiotic efflux pump	cephalosporin;disinfecting agents and antiseptics;fluoroquinolone antibiotic;glycylcycline;penam;phenicol antibiotic;rifamycin antibiotic;tetracycline antibiotic	antibiotic efflux
mdtA	0	2	0	2	Resistance-nodulation-cell division (RND) antibiotic efflux pump	aminocoumarin antibiotic	antibiotic efflux
mdtB	0	2	0	2	Resistance-nodulation-cell division (RND) antibiotic efflux pump	aminocoumarin antibiotic	antibiotic efflux
mdtC	0	2	0	2	Resistance-nodulation-cell division (RND) antibiotic efflux pump	aminocoumarin antibiotic	antibiotic efflux
adeA	1	0	0	1	Resistance-nodulation-cell division (RND) antibiotic efflux pump	glycylcycline;tetracycline antibiotic	antibiotic efflux
adeB	1	0	0	1	Resistance-nodulation-cell division (RND) antibiotic efflux pump	glycylcycline;tetracycline antibiotic	antibiotic efflux
adeR	1	0	0	1	Resistance-nodulation-cell division (RND) antibiotic efflux pump	glycylcycline;tetracycline antibiotic	antibiotic efflux
adeS	1	0	0	1	Resistance-nodulation-cell division (RND) antibiotic efflux pump	glycylcycline;tetracycline antibiotic	antibiotic efflux
arr-3	41	35	0	76	Rifampin ADP-ribosyltransferase (Arr)	rifamycin antibiotic	antibiotic inactivation
arr-2	7	11	0	18	Rifampin ADP-ribosyltransferase (Arr)	rifamycin antibiotic	antibiotic inactivation
SHV-12	0	1	0	1	SHV beta-lactamase	carbapenem;cephalosporin;penam	antibiotic inactivation
qacL	7	35	0	42	Small multidrug resistance (SMR) antibiotic efflux pump	disinfecting agents and antiseptics	antibiotic efflux
abeS	1	2	0	3	Small multidrug resistance (SMR) antibiotic efflux pump	aminocoumarin antibiotic;macrolide antibiotic	antibiotic efflux
Escherichia_coli_emrE	0	1	0	1	Small multidrug resistance (SMR) antibiotic efflux pump	macrolide antibiotic	antibiotic efflux
SAT-2	1	0	0	1	Streptothricin acetyltransferase (SAT)	nucleoside antibiotic	antibiotic inactivation
sul1	111	203	0	314	sulfonamide resistance	sulfonamide antibiotic;sulfone antibiotic	antibiotic target replacement
sul2	56	146	1	203	sulfonamide resistance	sulfonamide antibiotic;sulfone antibiotic	antibiotic target replacement
sul3	7	39	0	46	sulfonamide resistance	sulfonamide antibiotic;sulfone antibiotic	antibiotic target replacement
TEM-215	47	107	2	156	TEM ß-lactamase	cephalosporin;monobactam;penam;penem	antibiotic inactivation
TEM-214	12	14	0	26	TEM ß-lactamase	cephalosporin;monobactam;penam;penem	antibiotic inactivation
TEM-135	2	6	0	8	TEM ß-lactamase	cephalosporin;monobactam;penam;penem	antibiotic inactivation
TEM-40	1	5	0	6	TEM ß-lactamase	cephalosporin;monobactam;penam;penem	antibiotic inactivation
TEM-210	1	3	0	4	TEM ß-lactamase	cephalosporin;monobactam;penam;penem	antibiotic inactivation
TEM-176	1	1	0	2	TEM ß-lactamase	cephalosporin;monobactam;penam;penem	antibiotic inactivation
TEM-216	0	2	0	2	TEM ß-lactamase	cephalosporin;monobactam;penam;penem	antibiotic inactivation
TEM-33	1	0	0	1	TEM ß-lactamase	cephalosporin;monobactam;penam;penem	antibiotic inactivation
TEM-35	0	1	0	1	TEM ß-lactamase	cephalosporin;monobactam;penam;penem	antibiotic inactivation
TEM-55	0	1	0	1	TEM ß-lactamase	cephalosporin;monobactam;penam;penem	antibiotic inactivation
TEM-57	1	0	0	1	TEM ß-lactamase	cephalosporin;monobactam;penam;penem	antibiotic inactivation
TEM-90	0	1	0	1	TEM ß-lactamase	cephalosporin;monobactam;penam;penem	antibiotic inactivation
tet(M)	5	14	0	19	Tetracycline-resistant ribosomal protection protein	tetracycline antibiotic	antibiotic target protection
dfrA17	64	173	0	237	Trimethoprim resistant dihydrofolate reductase dfr	diaminopyrimidine antibiotic	antibiotic target replacement
dfrA12	42	71	0	113	Trimethoprim resistant dihydrofolate reductase dfr	diaminopyrimidine antibiotic	antibiotic target replacement
dfrA27	40	33	0	73	Trimethoprim resistant dihydrofolate reductase dfr	diaminopyrimidine antibiotic	antibiotic target replacement
dfrA14	10	33	0	43	Trimethoprim resistant dihydrofolate reductase dfr	diaminopyrimidine antibiotic	antibiotic target replacement
dfrA1	1	3	0	4	Trimethoprim resistant dihydrofolate reductase dfr	diaminopyrimidine antibiotic	antibiotic target replacement
dfrA5	0	1	0	1	Trimethoprim resistant dihydrofolate reductase dfr	diaminopyrimidine antibiotic	antibiotic target replacement
dfrA7	0	1	0	1	Trimethoprim resistant dihydrofolate reductase dfr	diaminopyrimidine antibiotic	antibiotic target replacement
dfrA8	0	1	0	1	Trimethoprim resistant dihydrofolate reductase dfr	diaminopyrimidine antibiotic	antibiotic target replacement
kdpE	0	1	0	1	Two-component system response regulator KdpE	aminoglycoside antibiotic	antibiotic efflux
bacA	1	4	0	5	Undecaprenyl pyrophosphate related proteins	peptide antibiotic	antibiotic target alteration
Total	1792	3703	7	5502
